# Supplementary material for: Kinase domain-targeted isolation of defense-related receptor-like kinases (RLK/Pelle) in Platanus × acerifolia: phylogenetic and structural analysis
Source: PubMed Central journal article supplement (PMC4295470; doi:10.1186/1756-0500-7-884), 2014-12-08
Supplement: 13104_2014_3456_MOESM1_ESM.pdf [file 13104_2014_3456_MOESM1_ESM.pdf]

**Additional file 1. Degenerate primers successfully used for PCR amplifications of kinase domain of RLK/Pelle genes.**

| Primer name <sup>a, b</sup> | Annealing site <sup>c</sup> | Sequence (5'→3') <sup>d</sup>              | Deg. degree | Targeted amino acid sequence <sup>e</sup>                               |
|-----------------------------|-----------------------------|--------------------------------------------|-------------|-------------------------------------------------------------------------|
| Xa21.F.I <sup>α</sup>       | Subd. I                     | GGMASYTTYGGKACTGTDAYAA                     | 1/192       | G <del>X</del> FGTVY <del>X</del>                                       |
| Xa21. F.II <sup>α</sup>     | Subd. I                     | GGDTCWGGMASYTTYGGWTCTGT                    | 1/192       | GSG <del>X</del> FGSV                                                   |
| Xa21.F.Ispec <sup>α</sup>   | Subd. I                     | GGMTSMTTTGGMTCAGTATAYAA                    | 1/32        | G <del>X</del> FGSVY <del>X</del>                                       |
| Xa21.R.I-gl <sup>α</sup>    | Subd. VIII                  | CCATAYTCTGGWGCDCRATAKCC                    | 1/48        | GY <del>X</del> APEYG                                                   |
| Pto.F.IB <sup>β</sup>       | Subd. I                     | GGYGSMTTYGGGAWGGTTTWTYARRGG                | 1/512       | G <del>X</del> FG <del>X</del> V <del>X</del> X <del>X</del> G          |
| Pto.F.II <sup>β, γ</sup>    | Subd. I                     | GGAKWGGGTGSMTTTGGRAMRGTTTA                 | 1/128       | G <del>X</del> G <del>X</del> FG <del>X</del> V <del>X</del>            |
| Pto.F.IA.n <sup>β</sup>     | Subd. I                     | GGACWKGGYGKMTTYGGGAWGGTTT                  | 1/128       | G <del>X</del> G <del>X</del> FG <del>X</del> V <del>X</del>            |
| Pto.F.IB.n <sup>β, δ</sup>  | Subd. I                     | GGYGKMTTYGGGAWGGTTTWTYARRGG                | 1/512       | G <del>X</del> FG <del>X</del> V <del>X</del> X <del>X</del> G          |
| Pto.F.II.pl <sup>γ</sup>    | Subd. I                     | GGACWTGGTGTCTTTGGRAMRGTTTA                 | 1/16        | G <del>X</del> GVFG <del>X</del> V <del>X</del>                         |
| Pto.R.I <sup>δ</sup>        | Subd. IX                    | ACWACACCRAAWGAATAMACRTC                    | 1/32        | DVYSFGVV                                                                |
| Pto.R.II.A <sup>β</sup>     | Subd. IX                    | GCRGRYCTAGCRCAAAGWACKTC                    | 1/64        | <del>X</del> VLCAR <del>X</del> A                                       |
| Pto.R.II.B <sup>γ</sup>     | Subd. IX                    | GCMGRCTWGCACAMARWACYTC                     | 1/128       | EV <del>X</del> CAR <del>X</del> A                                      |
| WAK1.F <sup>ε</sup>         | Subd. I                     | GGCYAWGGAACRGTBTACAAAGG                    | 1/24        | G <del>X</del> GTVYKG                                                   |
| WAK1.R <sup>ε</sup>         | Subd. IX                    | TCCATWAGGACDACYCCRAARCTAT                  | 1/48        | SFGVVL <del>X</del>                                                     |
| WAK.Ar.A.F <sup>η</sup>     | < Subd. I                   | AGAGYTDGARAAAGCYACYGADAAC                  | 1/144       | <del>X</del> E <del>X</del> EKAT <del>X</del> N                         |
| WAK.Ar.A.R <sup>η</sup>     | Subd. IX                    | CCRAARCTATARACATCACTYTTNTC                 | 1/16        | <del>X</del> KSDVYSFG                                                   |
| WAK.Ar.B.F <sup>θ</sup>     | < Subd. I                   | CYGGCARAGAAATCRYSAAGCMAC                   | 1/64        | <del>X</del> G <del>X</del> EI <del>X</del> KAT                         |
| WAK.Ar.B.R <sup>θ</sup>     | Subd. IX                    | CACAACCCGAAGCTRRTACACRTCGC                 | 1/4         | DVYSFGVV                                                                |
| WAK.Ar.C.F <sup>κ</sup>     | < Subd. I                   | GAGARAGCDACMRATRGTTCCTCYG                  | 1/96        | E <del>X</del> AT <del>X</del> FS <del>X</del>                          |
| WAK.Ar.C.R <sup>κ</sup>     | Subd. IX                    | ACVACYCCRAAGCTRRTASACRTRCTC                | 1/192       | SDVYSFGVV                                                               |
| WAK.Vt.A.F <sup>λ</sup>     | Subd. I                     | GRRTTMTTGGWCRWGGARGYCAAGG                  | 1/128       | <del>X</del> <del>X</del> <del>X</del> G <del>X</del> G <del>X</del> QG |
| WAK.Vt.A.R <sup>λ</sup>     | Subd. IX                    | AACWATTCCAAARCTATAKACATCAC                 | 1/8         | DVYSFG <del>X</del> V                                                   |
| WAK.Vt.B.F <sup>μ</sup>     | < Subd. I                   | GARGAGYTGSARARRGCMACAGAT                   | 1/128       | EE <del>X</del> <del>X</del> ATD                                        |
| WAK.Vt.B.R <sup>μ</sup>     | Subd. XI                    | MAAYTTSTTTCATKGTGGYCTTTT                   | 1/32        | KRPTMK <del>X</del> <del>X</del> <del>X</del>                           |
| EFR.F.I <sup>μ</sup>        | Subd. I                     | WTTYGGYWMWGTRTWYAAAGG                      | 1/512       | FG <del>X</del> V <del>X</del> KG                                       |
| EFR.R.I <sup>μ</sup>        | Subd. VIII                  | CCATAYTCTGGHGCCKGCATAKCCRAT                | 1/48        | IGYAAPEYG                                                               |
| EFR.R.II <sup>μ</sup>       | Subd. IX                    | ATYCCRWAGCTGTAMAYATCTCC                    | 1/32        | GD <del>X</del> YS <del>X</del> G <del>X</del>                          |
| Xa26.F <sup>ν</sup>         | Subd. I                     | GGVKYYGGAAGYTTTGGWAAWGGTTT                 | 1/192       | G <del>X</del> GSFG <del>X</del> V <del>X</del>                         |
| Xa26.R.II <sup>ν</sup>      | Subd. IX                    | ATGATSCCRWARCTGAAYACATCRCT                 | 1/64        | SDVFS <del>X</del> GI <del>X</del>                                      |
| BRI1.F <sup>π</sup>         | < Subd. I                   | GRAARCTYACNTTYGCDGATCTTCT                  | 1/192       | KLTFADLL                                                                |
| BRI1.R <sup>π</sup>         | Subd. XI                    | CKGCTTGDAYTTCCTTRAACWTNGCC                 | 1/192       | A <del>X</del> FKEIQA <del>X</del>                                      |
| BRL1.F <sup>ξ</sup>         | < Subd. I                   | TWGAAGCBACMAAYGGBTTYAG                     | 1/144       | EATNGF <del>X</del>                                                     |
| BRL1.R <sup>ξ</sup>         | Subd. X                     | CCCA <del>X</del> CCNACMAGRTRTRTRTCWTC     | 1/256       | <del>X</del> DNNLVGW <del>X</del>                                       |
| BRL2.FII <sup>ψ</sup>       | < Subd. I                   | ACAACATGGAARATTGACAARGAGAAAGA              | 1/4         | TTWKIDKEK <del>X</del>                                                  |
| BRL2.FIII <sup>ω</sup>      | < Subd. I                   | CTCATTGARGCYACCAA <del>X</del> GGCTTCTCWGC | 1/16        | LIEATNGFSA                                                              |
| BRL2.RI <sup>ψ</sup>        | Subd. X                     | CACCAHCCCACCAARTTRGTGTCKCC                 | 1/24        | GDTNLVGVV                                                               |
| BRL2.RII <sup>ω</sup>       | Subd. XI                    | CCAGGYATCAGCTCYCTCAACATGGCYAC              | 1/8         | VAMLREL <del>X</del> PG                                                 |

<sup>a</sup> Primer codes contain the reference gene acronyms (*Xa21*, *Xa26*, *EFR*, *Pto*, *BRI1*) or the structural gene class acronyms (WAK kinase, which include *RF01*) from which they were generated; forward and reverse primers are indicated by the letters F and R, respectively, within each code. <sup>b</sup> Forward primers were paired with reverse primers showing the same Greek letter. <sup>c</sup> < =upstream. <sup>d</sup> Degenerate IUPAC 1-letter code abbreviations are used. <sup>e</sup> X represents a variable residue as computed by the Emboss Transeq tool.
