# Supplementary material for: Kinase domain-targeted isolation of defense-related receptor-like kinases (RLK/Pelle) in Platanus × acerifolia: phylogenetic and structural analysis
Source: PubMed Central journal article supplement (PMC4295470; doi:10.1186/1756-0500-7-884), 2014-12-08
Supplement: 13104_2014_3456_MOESM2_ESM.pdf [file 13104_2014_3456_MOESM2_ESM.pdf]

**Additional file 2. Primer pairs used to isolate RLK/Pelle gene fragments and efficiency of the gene fishing process.**

| Primer pairs |             | $\frac{\text{RLK}}{\text{n.Seq.}}^a$ | Primer pairs |            | $\frac{\text{RLK}}{\text{n.Seq.}}^a$ |
|--------------|-------------|--------------------------------------|--------------|------------|--------------------------------------|
| For          | Rev         |                                      | For          | Rev        |                                      |
| Xa21.F.I     | Xa21.R.I-gl | 26/26                                | Pto.F.IB     | Pto.R.IIA  | 5/5                                  |
| Xa21.F.II    | Xa21.R.I-gl | 17/17                                | Pto.F.II     | Pto.R.IIA  | 5/5                                  |
| Xa21.F.Ispec | Xa21.R.I-gl | 1/4                                  | Pto.F.II     | Pto.R.II.B | 4/5                                  |
| Xa26.F       | Xa26.R.II   | 7/8                                  | Pto.F.IA.n   | Pto.R.II.A | 7/7                                  |
| EFR.F.I      | EFR.R.I     | 13/13                                | Pto.F.IB.n   | Pto.R.I    | 6/6                                  |
| EFR.F.I      | EFR.R.II    | 3/8                                  | Pto.F.IBn    | Pto.R.II.A | 9/10                                 |
| WAK1.F       | WAK1.R      | 14/14                                | Pto.F.II.pl  | Pto.R.II.B | 5/5                                  |
| WAK.Ar.A.F   | WAK.Ar.A.R  | 11/11                                | BRI1.F       | BRI1.F     | 12/12                                |
| WAK.Ar.B.F   | WAK.Ar.B.R  | 3/10                                 | BRL1.F       | BRL1.R     | 8/12                                 |
| WAK.Ar.C.F   | WAK.Ar.C.R  | 13/13                                | BRL2.FII     | BRL2.RI    | 12/12                                |
| WAK.Vt.A..F  | WAK.Vt.A.R  | 13/13                                | BRL2.FIII    | BRL2.RII   | 18/18                                |
| WAK.Vt.B.F   | WAK.Vt.B.R  | 13/13                                |              |            |                                      |

<sup>a</sup> Ratio of the number of RLK/Pelle gene fragments which were obtained out of the total number of sequenced PCR clones.
