# Supplementary material for: Kinase domain-targeted isolation of defense-related receptor-like kinases (RLK/Pelle) in Platanus × acerifolia: phylogenetic and structural analysis
Source: PubMed Central journal article supplement (PMC4295470; doi:10.1186/1756-0500-7-884), 2014-12-08
Supplement: 13104_2014_3456_MOESM3_ESM.pdf [file 13104_2014_3456_MOESM3_ESM.pdf]

**Additional file 3. *Platanus* × *acerifolia* (Pac) RLK/Pelles: NCBI GenBank accession numbers, subfamily classification and sequence text.** Sequences in A and B were obtained in this work, those in C were used for comparison. In D nucleotide and amino acidic sequences are listed.

## A

| Continuous ORF | Acc. Nos. | RLK/Pelle subfamily |
|----------------|-----------|---------------------|
| pac.x.5.1      | EU722764  | LRR XII-like        |
| pac.x.5.2      | EU722765  | LRR XII-like        |
| pac.x.5.3      | EU722766  | LRR XII-like        |
| pac.x.5.4      | EU722767  | LRR XII-like        |
| pac.x.5.6      | EU722768  | LRR XII-like        |
| pac.x.5.8      | EU722769  | LRR XII-like        |
| pac.x.5.9      | EU722770  | LRR XII-like        |
| pac.x.5.12     | EU722771  | LRR XII-like        |
| pac.x.5.13     | EU722772  | LRR XII-like        |
| pac.x.5.14     | EU722773  | LRR XII-like        |
| pac.x.5.17     | EU722774  | LRR XII-like        |
| pac.x.5.18     | EU722775  | LRR XII-like        |
| pac.x.5.19     | EU722776  | LRR XII-like        |
| pac.x.5.26     | EU722777  | LRR XII-like        |
| pac.x.5.39     | EU722778  | LRR VII-like        |
| pac.x.5.43     | EU722779  | LRR VII-like        |
| pac.x.6.102    | EU722780  | LRR XII-like        |
| pac.x.6.103    | EU722781  | LRR XII-like        |
| pac.x.6.104    | EU722782  | LRR XII-like        |
| pac.x.6.107    | EU722783  | LRR XII-like        |
| pac.x.6.108    | EU722784  | LRR XII-like        |
| pac.x.6.109    | EU722785  | LRR XII-like        |
| pac.x.6.112    | EU722786  | LRR XII-like        |
| pac.x.6.115    | EU722787  | LRR XII-like        |
| pac.x.6.123    | EU722788  | LRR XII-like        |
| pac.x.6.124    | EU722789  | LRR XII-like        |
| pac.x.6.129    | EU722790  | LRR XII-like        |
| pac.x.7.4      | EU722791  | LRR XII-like        |
| pac.x6.52      | EU722792  | L-Lectin-like       |
| pac.x6.53      | EU722793  | L-Lectin-like       |
| pac.x6.54      | EU722794  | L-Lectin-like       |
| pac.x6.55      | EU722795  | L-Lectin-like       |
| pac.pt.4.7     | EU722796  | CrRLK1L-like        |
| pac.pt.4.8     | EU722797  | CrRLK1L-like        |
| pac.pt.4.11    | EU722798  | CrRLK1L-like        |
| pac.pt.4.13    | EU722799  | CrRLK1L-like        |
| pac.pt.4.14    | EU722800  | CrRLK1L-like        |
| pac.pt.5.102   | EU722801  | CrRLK1L-like        |

|                |          |               |
|----------------|----------|---------------|
| pac.pt.5.103   | EU722802 | CrRLK1L-like  |
| pac.pt.5.104   | EU722803 | CrRLK1L-like  |
| pac.pt.5.106   | EU722804 | CrRLK1L-like  |
| pac.pt.5.107   | EU722805 | CrRLK1L-like  |
| pac.pt.5.110   | EU722806 | CrRLK1L-like  |
| pac.pt.5.113   | EU722807 | CrRLK1L-like  |
| pac.pt.2.202   | EU722808 | CrRLK1L-like  |
| pac.pt.2.203   | EU722809 | CrRLK1L-like  |
| pac.pt.2.205   | EU722810 | CrRLK1L-like  |
| pac.pt.2.207   | EU722811 | CrRLK1L-like  |
| pac.pt.2.209   | EU722812 | CrRLK1L-like  |
| pac.pt.2.210   | EU722813 | CrRLK1L-like  |
| pac.pt.10.301  | EU722814 | CrRLK1L-like  |
| pac.pt.10.306  | EU722815 | CrRLK1L-like  |
| pac.pt.10.309  | EU722816 | CrRLK1L-like  |
| pac.pt.10.310  | EU722817 | CrRLK1L-like  |
| pac.ptd.5.2    | EU722818 | CrRLK1L-like  |
| pac.ptd.5.5    | EU722819 | CrRLK1L-like  |
| pac.ptd.8.21   | EU722820 | CrRLK1L-like  |
| pac.ptd.8.22   | EU722821 | CrRLK1L-like  |
| pac.ptd.8.23   | EU722822 | CrRLK1L-like  |
| pac.ptd.9.41   | EU722823 | CrRLK1L-like  |
| pac.Erf.2      | EU722824 | Uncertain     |
| pac.Erf.3      | EU722825 | LRR XII-like  |
| pac.Erf.4      | EU722826 | LRR XII-like  |
| pac.Erf.5      | EU722827 | LRR XII-like  |
| pac.Erf.6      | EU722828 | LRR XII-like  |
| pac.Erf.7      | EU722829 | LRR XII-like  |
| pac.Erf.9      | EU722830 | Uncertain     |
| pac.Erf.10     | EU722831 | LRR XII-like  |
| pac.Erf.11     | EU722832 | LRR XII-like  |
| pac.Erf.13     | EU722833 | Uncertain     |
| pac.Erf.14     | EU722834 | LRR XII-like  |
| pac.Erf.2B.210 | EU722835 | SD-2-like     |
| pac.Erf.2B.211 | EU722836 | SD-2-like     |
| pac.W.ArA.3    | EU722837 | Wak-like-like |
| pac.W.ArA.4    | EU722838 | Uncertain     |
| pac.W.ArA.5    | EU722839 | Uncertain     |
| pac.W.ArA.6    | EU722840 | Wak-like-like |
| pac.W.ArA.7    | EU722841 | Wak-like-like |
| pac.W.ArA.8    | EU722842 | Wak-like-like |
| pac.W.ArA.9    | EU722843 | Wak-like-like |
| pac.W.ArA.11   | EU722844 | Wak-like-like |
| pac.W.ArA.12   | EU722845 | Uncertain     |
| pac.W.ArA.14   | EU722846 | Wak-like-like |
| pac.W.ArB.305  | EU722847 | Wak-like-like |
| pac.W.ArB.312  | EU722848 | Wak-like-like |

|               |          |                      |
|---------------|----------|----------------------|
| pac.W.VtA.101 | EU722849 | Wak-like-like        |
| pac.W.VtA.102 | EU722850 | Wak-like-like        |
| pac.W.VtA.105 | EU722851 | Wak-like-like        |
| pac.W.VtA.107 | EU722852 | Wak-like-like        |
| pac.W.VtA.108 | EU722853 | Wak-like-like        |
| pac.W.VtA.109 | EU722854 | Wak-like-like        |
| pac.W.VtA.110 | EU722855 | Wak-like-like        |
| pac.W.VtA.113 | EU722856 | Wak-like-like        |
| pac.W.VtB.201 | EU722857 | Wak-like-like        |
| pac.W.VtB.203 | EU722858 | Wak-like-like        |
| pac.W.VtB.208 | EU722859 | Wak-like-like        |
| pac.W.VtB.209 | EU722860 | Wak-like-like        |
| pac.W.Ch.152  | EU722861 | Wak-like-like        |
| pac.W.Ch.156  | EU722862 | Wak-like-like        |
| pac.W.Ch.157  | EU722863 | Wak-like-like        |
| pac.W.Ch.158  | EU722864 | Wak-like-like        |
| pac.W.Ch.160  | EU722865 | Wak-like-like        |
| pac.W.Ch.162  | EU722866 | Wak-like-like        |
| pac.W.Ch.164  | EU722867 | Wak-like-like        |
| pac.BRL.L.2   | EU722868 | LRR X BRI group-like |
| pac.BRL.L.6   | EU722869 | LRR X BRI group-like |
| pac.BRL.B.8   | EU722871 | LRR X BRI group-like |
| pac.BRL.B.9   | EU722872 | LRR X BRI group-like |
| pac.BRL.B.12  | EU722873 | LRR X BRI group-like |
| pac.BRL.B.14  | EU722874 | LRR X BRI group-like |
| pac.BRL2.102  | HQ425329 | LRR X BRI group-like |
| pac.BRL2.8    | HQ425330 | LRR X BRI group-like |

---

## B

| Interrupted ORF   | Acc. Nos. |
|-------------------|-----------|
| pac.x.5.5-St      | EU722875  |
| pac.x.5.7-St      | EU722876  |
| pac.x.5.11-St     | EU722877  |
| pac.x.5.27-St     | EU722878  |
| pac.x.6.105-St    | EU722879  |
| pac.x.6.111-st    | EU722880  |
| pac.x.6.130-St    | EU722881  |
| pac.Pt.4.9-St     | EU722882  |
| pac.Pt.5.105-St   | EU722883  |
| pac.Pt.10.308-St  | EU722884  |
| pac.Erf.8-st      | EU722885  |
| pac.Erf.2B.205-st | EU722886  |
| pac.W.VtA.103-st  | EU722887  |
| pac.W.VtA.104-st  | EU722888  |

|                  |          |
|------------------|----------|
| pac.W.VtA.106-st | EU722889 |
| pac.W.VtA.111-st | EU722890 |
| pac.W.VtA.114-st | EU722891 |
| pac.W.VtB.205-st | EU722892 |
| pac.W.VtB.206-st | EU722893 |
| pac.W.VtB.211-st | EU722894 |
| pac.W.VtB.212-st | EU722895 |
| pac.W.VtB.214-st | EU722896 |
| pac.W.Ch.151-st  | EU722897 |
| pac.W.Ch.154-st  | EU722898 |
| pac.W.Ch.159-st  | EU722899 |
| pac.W.Ch.163-st  | EU722900 |

## C

| Long ORF | Acc. Nos. | RLK/Pelle subfamily |
|----------|-----------|---------------------|
| Isotig1  | KF208644  | CrRLK1L             |
| Isotig2  | KF208645  | CrRLK1L             |
| Isotig3  | KF208646  | CrRLK1L             |
| Isotig4  | KF208647  | LRR XII             |
| Isotig5  | KF208648  | LRR XII             |
| Isotig6  | KF208649  | LRR XII             |
| Isotig7  | KF208650  | LRR XII             |
| Isotig8  | KF208651  | Wak-like            |
| Isotig9  | KF208652  | LRR X-BRI1          |
| Isotig10 | KF208653  | LRR X-BRL           |

## D

### nt sequences

```

>pac.x.5.1
AGGGGTACTATCTGACCGGACTATTGGTGCTATAAAGGTTTTCAATTTGGAATTTCTAGC
AGCATTTAAGAGTTTTGATGCAGAATGTGAAGTAATGCGTAATATATGCCACCGGAACCT
TGTCAAAATCATAAGTAGTTGCTCCAATACTGAATTTAGAGCATTGATTCTTGAGTACAT
GCCAATGGAAGCCTCGAGAAGTGGTTGTATTCTTACAACATATTATCTGGATTTTCATGCA
AAGACTGGACATTATGTTAGATGTGGCATCTGCACTGGAATATCTTCATCACGATTATTC
AACAGCAGTGGTACATTGTGACTTGAAGCCAAGCAATGTCTTACTAGATGAAGACATGGT
TGGGCATGTATGTGATTTCCGCATCGCAAAGCTCTTGCCAGAAAATGAATCTACCAAACA
AACAAAGACATTAGGGACATTG
>pac.x.5.2
AGGAATTCCTTCATCAAGATAAACTACCTGTTGCTGTGAAGGTACTCAATCTACAAGAACG
GGGGGCTTCGAAGAGTTTTCATGGCTGAATGTGAGATCTTGAGAGAAAATTCGGCATCGAAA
CCTTCTCAAGATATTAGCTTCTTGTCTCAACTATTGACTTTCAAGGTAATGATTTTAAAGC
TCTTGTTTTTTGAGCTCATGCCTAACGGGAGTCTTGAAAGGTGGTTGCACCCAAGTACAGA
TGGACAACATTTGTTGAATTTATGCTTGGGCAAGAGATTAGACATAGCAATTGATAT
CGCTTCTGCTTTGGATTATCTTCATCACCATAACCAAACCTCCAATTGTTCACTGTGATCT
AAAGCCAAGCAACATTTCTTCTTGATGATAGCATGGCCGCTCATATGGGTGATTTTGGGTT
AGCAAAGTTCCTTTCTAAAGACACCAACTTTTCTGATAAAAATGAACTAGTTCAATAGC
CATAAAGGGTCTATT

```

>pac.x.5.3

AGGGATTCTTCCCTCGAGATGAGCTACCTGTTGCTGTAAAGGTAAGTCAACCTTCAAGAATG  
CGGGGCTTCCAAGAGTTTTCATGGCTGAATGTGAAGCCTTGAGAGCAATTCGGCACCGGAA  
CCTCCTCAAGATCTTAACATCTTGCTCAGGTGTGGACTTTGAAGGTAACGATTTCAAAGC  
TCTTGTTTTTGGAGTCTATGCATAATGGGAGTCTTGAAAAGTGGTTGCACCCAACATATAGA  
TGGACGACATCTATTGAATAAATTTGAGGTTTGGGCAGAGATTAATAATAGCAATTGATGT  
CGCTTCTGCTTTGGATTATCTTCACCACCATTGCCAAACTCCAATTGTTACCCGCGATAT  
AAAGCCAAGCAATGTCCTTCTTGATGATGACATGACTGCCCATGTTGGTGATTTGGGTT  
GGCAAAGTTCCTTTCTAATCCCAAAAACAATTCAGAAAATTTGAAAGTAGTTCCGGTTGC  
CTTAAGAGGATCTATT

>pac.x.5.4

AGGACTTCTAAATCAGGGTGAACAATTTGTTGCAGTGAAGGTAAGTCAACCTTCAACAATA  
CGGATCCTATAAGAGCTTTCATGGCTGAGTGCAGATCCTTGAGGAACATCCAGCATCGGAA  
TCTCGTCAAGGTCATAACTTCTGCTCAAGTATAGATTTTGAGGGCAATGATTTCAAAGC  
TCTAGTTTACGAGTTTCATGAGTAATGGAAGTTTAGAGAGGTTGGTTACATCCAATGCAGA  
AGATGCACAAGTTGAACAGAGGAATTTAAATCTTCTTCAAAGGCTTAACATTGCCATTGA  
TGTTGCCTGTGCACCTGATTTACTTCTTATCACAACCTTAAAACACCAATTGTTCAATGTGA  
TCTAAAGCCAAGCAACGTTCTCTTGATGACGACATGGTTGCTCATGTGGTGATTTGG  
TTTATCAAGATTCCTTCCAATGACAATTAATAATTCCTCTCGAAGTCAAACCAGCTCTAT  
GGGAATA

>pac.x.5.6

AGGAATGGTTTCATCAGGATGGAAGACTAGTATCGGTTGCTGTGAAGGTATTGAACCTTCA  
ACAACAAGAAGCATCCAAGACTTTTATGGCCGAATGCAAAGCATTGAGGAATGTCCGGCA  
TCGAAATCTCCTCAAGATCATTACTTCTTGTTGAGTGCAGGATTTAAGGGTAATGAGTT  
TAAGGCTCTAGTTTTGGAGTTTCATGCCTAATGGGAGTCTAGAGAGTTGGTTGCACCCAAG  
GATAGATGGACAACCTTCAATTGAGATACTTGAGCATTAGTCAAAGATTGAATATAGCAAT  
TGATGTTGCTTTAGCATTGGATTATCTTACACACCATTGTCAAATTCCTATTGCTCATTG  
TGATCTAAAACCAAGCAATGTTCTTCTTAATGATGACATGACTGCCCATGTTGGTGACTT  
TGGACTAGCCAAATTCCTTTATAGGGCTTCAAACAATTTGTTGGTGAAGGTCAACACAGTTC  
AGCTGCACCTAAGGGAACCTATT

>pac.x.5.8

AGGAATTCCTTTGTCAGATGAACCACCTGTTGCTGTGAAGGTAAGTCAACCTTCAAGAACA  
GGGGGCTTCCAAGAGTTTTCATGGCTGAATGTGAAGCTTTAAGAGAGATTCGACATCGAAA  
CCTCCTTAAGATCTTAACTTCTGCTCAAGTGTGGACTTTGAAGGTATTGATTTCAAAGC  
TCTTGTTTTTGGAGTCTATGCCTAATGGGAGTCTTGAAAATTTGGTTGCACCAAAGTACAAA  
TGGACAACATCTGAATGATTTGAACCTTCGGCCAGAGGTTAAACATAGCGATGGATGTGCG  
TTTGGCTTTGGATTATCTTCACTCACCCTGCAAAACCCCTATTGTTCACTGTGATTTAAA  
GCCAAGCAATGTTCTTCTCGATGATAACATGGTGGCCCATCTCGGTGATTTTGGGTTAGC  
AAAGATCCTTTCTATGACCTCCAACCTATTCAGTGAATAATGAAACTATTTCAATTGTGAT  
AAAGGGATCTATT

>pac.x.5.9

AGGGATTCTTCCCTCGAGATGAGCTACCTGTTGCTGTAAAGGTAAGTCAACCTTCAAGAATA  
CGGGGCTTCCAAGAGTTTTCATGGCTGAATGTGAAGCCTTGAGAGCAATTCGGCACCGGAA  
CCTCCTCAAGATCTTAACATCTTGCTCAGGTGTGGACTTTGAAGGTAACGATTTCAAAGC  
TCTTGTTTTTGGAGTCTATGCATAATGGGAGTCTTGAAAAGTGGTTGCACCCAACATATAGA  
TGGACAACATCTATTGAATAAATTTGAGGTTTGGGCAGAGATTAATAATAGCAATTGATGT  
CGCTTCTGCTTTGGATTATCTTCACCACCATTGCCAAACTCCAATTGTTACCCGCGATCT  
AAAGCCAAGCAATGTCCTTCTTGATGATGACATGACTGCCCATGTTGGTGATTTGGGTT  
GGCAAAGTTCCTTTCTAATCCCAAAAACAATTCAGAAAATTTGAAAGCAGTTCCGGTTGC  
CTTAAGAGGGTCTATT

>pac.x.5.12

AGGAATTCCTTCGTCAGGATGAACAACCTATTGCTGTGAAGGTAGTCAACCTTCAAGAACA  
AGGGGCTTCCAAGAGTTTTCATGGCTGAATGTGAAGCCTTGAGAGAAATTCGACATCGAAA  
TCTCCTTAAGATCTTAACTTCTGCTCAAGTGTGGACTTTCAAGGTAATGATTTCAAAGC  
TCTTGTTTTTGGAGTCTATGCCTAATGGGAGTCTTGAAAAGTGGTTGCATCCAAAACAAA  
TGAACAAAATCAATTGAATAAGTTGAATCTTAGACAGAGATTAACATATCAATTGATGT  
CGCTTCTGCTTTGGATTATCTTCACTCATCAGTGCCAAACCCCTATTGTTCAATTGTGATTT  
AAAGCCAAGCAATGTTCTTCTTGATGATGACATGACTGCCCATGTTGGTGATTTGGGTT  
GGCAAAGTTCCTTTCTAATCCCAAAAACAATTCAGAAAATTTGAAAGCAGTTCCGGTTGC  
CTTAAGAGGGTCTATT

>pac.x.5.13

AGGTAATCTTCCCTCGAGATGATCTACCTGTTGCTGTAAAGGTAAGTCAACCTTCAAGAATG  
TGGGGCTTCCAAGAGTTTTCATGGCTGAATGTGAAGCCTTGAGAGCAATTCGGCATCGGAA  
CCTCGTCAAGATCTTAACATCTTGCTCAAGTGTGGACTTTGAAGGTAACGATTTCAAAGC  
TCTTGTTTTTGGAGTCTATGCATAATGGGAGTCTTGAAAAGTGGTTGCACCCAACCTTAGA  
TGGGCGACATCTATTGAATAAATTTGAGGTTTGGGCAGAGATTAATAATAGCAATTGATGT  
CGCTTCCGCTTTGGATTATCTTCACCACCATTGCCAAACTCCAATTGTTCACTGCGATCT  
AAAACCAAGCAATGTTCTTCTTGATGATGACATGACTGCCCATGTTGGTGATTTGGGTT  
GGCAAAGTTCCTTTTCTAATCCCAAAAACAATTCAGAAAAATTTGAAAGTAGTTCCGGTTGC  
CTTAAGAGGATCTATT

>pac.x.5.14

AGGACTTCTAAATCAGGGTGAAACAAATGTTGCAGTGAAGGTATTCAACCTTCCACAACA  
TGGAGCCTCTAAGAGTTTCATGGCTGAGTGTGAATCCTTGAGAAACATCCGGCATCGGAA  
TCTCGTCAAGGTTATAACTTCTGCTCGAGTATAGATTTTGC GGCAATGATTTCAAAGC  
TCTAGTTTACGAGTTTATGAGTAATGGAAGTTTAGAGAGGTGGTTATATCCAAATGCAGA  
AGTGGCACAAGTTGAACAAAGGAATTTAAATATTTCTTCAAAGACTTAACATTGCCATTGA  
TGTTGCCTCTGCACTAGATTATCTTTCATCACAACCTGTAAAACACCAATCATTTCATTGTGA  
TCTAAAGCCAAGCAACATTCTCCTTGATGACGACATGGTTGCTCACGTGGGTGATTTTGG  
TTTATCAAGATTCTCCCAATGACGATTAATAATTTCTCAAAGTCAAACCAGCTCTATTGG  
AATAAAAGGATCCATT

>pac.x.5.17

AGGGATTCTTCATCAGAATGAACTACCTATTGCTGTGAAGGTATTCAATCTTCTGGAACA  
TGGGGCTTCCAAGAGTTTCATGACCGAATGTGAAGCTTTGAGAGAGATTCCGGCATCGAAA  
CCTCCTCAAGATCTTAACTTCTTGTCTCAAGTACCGACTTTGAAGGTAATGACTTCAAAGC  
TCTTGTTTTTGTGCTCATGCCTAATGGGAGTCTTGAAAACCTGGTTGCACCAAAGTACATA  
TGGACGACATCAAAATTTTGAACCTTTGACCAGAGATTAACATAGCAATTGACGTGCGC  
ATCTGCTTTGGACTATCTTTCATCACCAGTGCCAAACCCCTATTGTTCACTCTGATCTAAA  
GCCAAGCAATGTTCTTCTTGACGATGACATGGTTGCCCATGTGAGTATTTGGGTAGC  
AAAGTTTCAATTTCTAAGCCACCAAAATTTCTGGTAAACAATAAACTAGTTTCACTGTCAT  
AAAGGGATCTATT

>pac.x.5.18

AGGGATTCTTCTCGAGATGATCTACCTGTTGCTGTAAAGGTACTCAACCTTCAAGAATG  
TGGGGCTTCCAAGAGTTTCATGGCTGAATGTGAAGCCTTGAGAGCAATTCGGCATCGGAA  
CCTCGTCAAGATCTTAACTTCTTGTCTCAAGTGTGGACTTTGAAGGTAACGATTTCAAAGC  
TCTTGTTTTTGTGCTCATGCATAATGGGAGTCTTGAAAACCTGGTTGCACCAAACCTTTAGA  
TGGGCAACATCTATTGAATAATTTGAGGTTTGGGCAGAGATTAATAATAGCAATTGATGT  
CGCTTCTGCTTTGGATTATCTTCACCACCATTGCCAAACTCTAATTGTTCACTGTGACCT  
AAAACCAAGCAATGTTCTTCTTGATGATGACATGACTGCCCATGTGGGTGATTTTGGGTT  
AGCAAAATTCATTTCAAAGCCTACCAACTATTTTGGTAAAAATGACACTAGTTTCACTCAAT  
TGCTATAAAAGGATCTATC

>pac.x.5.19

AGGGATTCTTCTCGAGATGATCTACCTGTTGCTGTAAAGGTACTCAACCTTCAAGAATG  
TGGGGCTTCCAAGAGTTTCATGGCTGAATGTGAAGCCTTGAGAGCAATTCGGCATCGGAA  
CCTCGTCAAGATCTTAACTTCTTGTCTCAAGTGTGGACTTTGAAGGTAACGATTTCAAAGC  
TCTTGTTTTTGTGCTCATGCATAATGGGAGTCTTGAAAACCTGGTTGCACCAAACCTTTAGA  
TGGGCAACATCTATTGAATAATTTGAGGTTTGGGCAGAGATTAATAATAGCAATTGATGT  
CGCTTCTGCTTTGGATTATCTTCACCACCATTGCCAAACTCCAAATTGTTCACTGCGATTT  
AAAACCAAGCAATGTTCTTCTTGATGATGACATGACTGCCCATGTGGGTGATTTTGGGTT  
AGCAAAGATCCTTTCTAAACCCACCAGCTACACTGGGAAAAATGAACTAGTTTCACTTGC  
CATAAAGGGATCAATT

>pac.x.5.26

AGGACTTCTAAATCAGGGTGAAACAAATGTTGCAGTGAAGGTATTCAACCTTCCACAACA  
TGGAGCCTCTAAGAGTTTCATGGCTGAGTGTGAATCCTTGAGAAACATCCGGCATCGGAA  
TCTCGTCAAGGTTATAACTTCTGCTCGAGTATAGATTTTGC GGCAATGATTTCAAAGC  
TCTAGTTTACGAGTTTATGAGTAATGGAAGTTTAGAGAGGTGGTTATATCCAAATGCAGA  
AGTGGCACAAGTTGAACAAAGGAATTTAAATATTTCTTCAAAGACTTAACATTGCCATTGA  
TGTTGCCTCTGCACTAGATTATCTTTCATCACAACCTGTAAAACACCAATCATTTCATTGTGA  
TCTAAAGCCAAGCAACATTCTCCTTGATGACGACATGGTTGCTCACGTGGGTGATTTTGG  
TTTATCAAGATTCTCCCAATGACAATTAATAATTTCTTCTCGAAGTCAAACCAGCTCTAT  
TGAATAAAAGGATCCATT

>pac.x.5.39

GGCTTCTCTAGGTGGAGAAAAGAGGATTTTGGCCATTAAGAAGCTTGTAACCTCTAACAT  
AATCCAATATCCAGAAGATTTTACAGAGAAGTTAGAATTTAGGAAAAGCTATGCACCC  
AAATCTGATGACACTCAAAGGTTACTACTGGACTCCTCAGTTGCAGCTTCTGATATCTGA  
TTATGCTCCCAATGGAAGCTTGCACTCCAACTCCATGAAAGGTCCCCGTCCACCCCTTC  
TCTTTCTTGGGCCAACCGATTCAAAATTTGCTTGGAAACAGCAAAGGACTTGCTCATCT  
GCATCAGTCTTTCCGTCCACCAATCATACTACAATGTCAAACCAAGCAATATCTTGCT  
TGATGAGAATTACAATCCAAAGATCTCCGACTTTGGACTGGCAAGGCTTCTTCCCAAGCT  
CGACAAGCATGTGATAAATAGCAGGTTTTCAGAGTGCCTTA

>pac.x.5.43

GGCTTCTCTAGGTGGAGAAAAGAGGATTTTGGCCATTAAGAAGCTTGTAACCTCTAACAT  
AATCCAATATCCAGAAGATTTTACAGAGAAGTTAGAATTTAGGAAAAGCTATGCACCC  
AAATCTGATGACACTCAAAGGTTACTACTGGACTCCTCAGTTGCAGCTTCTGATATCTGA  
TTATGCTCCCAATGGAAGCTTGCACTCCAACTCCATGAAAGGTCCCCGTCCACCCCTTC  
TCTTTCTTGGGCCAACCGATTCAAAATTTGCTTGGAAACAGCAAAGGACTTGCTCATCT  
GCATCAGTCTTTCCGTCCACCAATCATACTACAATGTCAAACCAAGCAATATCTTGCT  
TGATGAGAATTACAATCCAAAGATCTCCGACTTTGGACTGGCAAGGCTTCTTCCCAAGCT  
CGACAAGCATGTGATAAATAGCAGGTTTTCAGAGTGCCTTA

>pac.x.6.102

GTATAAAGGAATTTCTTTCATCAAGATAAACTACCTGTTGCTGTGAAGGTACTCAATCTACA

AGAACGGGGGCTTCGAAGAGTTTCATGGCTGAATGTGAGATCTTGAGAGAAATTCGGCA  
TCGAAACCTTCTCAAGATATTAGCTTCTTGCTCAACTATTGACTTTCAAGGTAATGATTT  
TAAAGCTCTTGTTTTTGAGCTCATGCCTAACGGGAGTCTTGAAAGATGGTTGCACCCAAG  
TACAGATGGACAACATTTGTTGAATTATTTATGCTTGGGCAAGAGATTAGACATGGCAAT  
TGATATCGCTTCTGCTTTGGATTATCTTCATCACCATAACCAAACCTCCAATTGTTCACTG  
TGATCTAAAGCCAAGCAACATTTCTTCTTGATGATAGCATGACCGCTCATATGGGTGATTT  
TGGGTTAGCAAAGTTCTTTCTAAAGACACCAAACCTTTTCTGATAAAAATGAACTAGTTC  
AATAGCCATAAAGGGTCTATT

>pac.x.6.103

GTATAAAGGAATCCTTCATCGAGATGAATCTCCTATTGCTGTGAAGGTATTCAATCTTCT  
GGAACATGGGGCTTCCAAGAGTTTCATGACCGAATGTGAAGCTTTGAGAGAGATTCGGCA  
TCGAAACCTCCTCAAGATCTTAACTTCTTGCTCAAGTACCGACTTTGAAGGTAATGACTT  
CAAAGCTCTTGTTTTTGTGCTCGTGCCTAATGGGAGTCTTGAAAACCTGGTTGCACCAAAG  
TACATATGGACGACATCAAAATTTTGAACCTTGACCAGAGATTAAACATAGCAATTGA  
CGTCGCATCTGCTTTGGACTATCTTCATCACCAGTGCCAAACCCCTATTGTTCACTCTGA  
TCTAAAGCCAAGCAATGTTCTTCTTGACGATGGCATGGTTGCCATGTCAGTGATTTTGG  
GTTAGCAAAGTTCATTTCTAAGCCCACCAAATATTCTGGTAACAATAAACTAGTTCAGT  
TGTCATAAAGGGATCTATT

>pac.x.6.104

ATATAAAGGAATGGTTCATCAGGATGGAAGACTAGTATCGGTTGCTGTGAAGGTATTGAA  
CCTTCAACAACAAGAAGCATCCAAGACTTTTTATGGCCGAATGCAAAGCATTGAGGAATGT  
CCGGCATCGAAATCTCCTCAAGATCATTACTTCTTGTTCGAGTGCAGGATTTTAAGGGTAA  
TGAGTTTAAGGCTCTAGTTTTGGAGTTCATGCCTAATGGGAGTCTAGAGAGTTGGTTGCA  
CCCAAGGATAGATGGACAACCTCAATTGAGATACTTGAGCATTAGTCAAAGATTGAATAT  
AGCAATTGATGTTGCTTTAGCATTGGATTATCTTCACAACCATTGTCAAATTCCTATTGC  
TCATTGTGATCTAAAACCAAGCAATGTTCTTCTTAATGATGACATGACTGCCCATGTGGG  
TGACTTTGGACTCGCCAAGTTCCTTTCTAGGGCTACCAGCAATCTGGTGAAGGTCAACA  
CAGCTCAGTTGCAATTAAGGGAACCTATT

>pac.x.6.107

ATATAAAGGAATTATCATTATGATGGAACACCAGCACCAGGTTGCTGTGAAGGTTTTGAA  
CCTTCAACAACAAGAGAGCTTCCAACAACTTTTCATGGTTGAATGCAATGCCTTGAGAAAAAT  
CAGGCACCGAAATCTCCTCAAGATCATAACTTCTTGCTCCAGTGTGGATTTTAAGGGTAA  
TGACTTTAAGGCTCTAGTTTTGAATACATGCCTAGTGAAGTCTGGAGAGCTGGTTGCA  
CCCAAGTATAGATGAAAAACATCAATCAAGATATTTGAACCTTAGCCAAAGATTAGACAT  
AGCAATTGATGCTGCTTTTGCAATGGATTATCTTAAAAACCATGCCCCAACCCGATCGT  
TCATTGTGATATAAAACCAAGCAACGTTCTTCTTGATGATGACATGACCGCTCATGTGGG  
TGACTTCGGACTAGCCAAGCTTCTTAGGGCTTCAAACAATTGTGGTGAAGGTCAACA  
CAGTTCAGCTGCACTTAAGGGAACCTATT

>pac.x.6.108

GTATAAAGGCATCTTTGTCAAGATGAACAACCTGTTGCTATAAAGGTTCTTATCCTTCA  
GGAAAGGGGGCTTCCAAGAGTTTATGGCCAAATGTGAAGCCTTAAGAGAAATTCAGCA  
TCGAAACCTCCTCAAAATCTTCACTTCTGCTCAACTGTGGACTTTGAAGGTAATTTTTT  
CAGAGCTTTTGTTCGAGTTCCTGCCTAATGGGAGTCTTGAAAACCTGGTTGCACCCAAG  
TACCGATGGACAACATCTATTGAAGAATTTGAGCTTTAGCCAGAGATTAACATAGCAAT  
TGATGTTGCTTTTACTTTGGATTATCTACATCACCATTGCCAAACCCCAATTGTTCAATTG  
TGATCTAAAGCCAAGCAATATTTCTTCTTGATGATGACATGACCACCCATGTGGGTGATTT  
TGGGTTAGCAAATTCCTATCTAAACCAACCAATTTATCCCGTAAGGATGAACTAGTTC  
AGTTGCCATAAAGGGATCTATC

>pac.x.6.109

TTATAAAGGAATTTTTTCATCAAGATGGAAGAGCAATATTGATCGCTGTGAAGGTATTGAA  
CCTTCTACAACAAGAAAGCATCTAAGACCTTTCATGGCCGAATGCAAAGCATTAAAGGAACAT  
CCGGCATCGAAATCTACTCAAGATCTTAACTTCTTGCTCAAGTATAGATTTTAAGGGTAA  
TGATTTCAAGGCTCTAGTTTTCGAGTTCATGCCTAATAGGAGTCTAGAGAGTTGGTTACA  
TCCAAGTGTAACGAACACCATCAATTAAGGTGCCTGAATTTAGCCAAAGACTAAACGT  
AGCAATCGATGTTGCTTTTGCAATGGATTATCTTCAAACCATGCCCCAACACCTATTGT  
TCATTGTGATCTAAAACCAAGCAATGTTCTTTTGTGATGATGACATGACTGCCCATGTGGG  
TGACTTTGGACTAGCCAAGTTCCTTTCTATGGCTACCAGCAATTTCTGGTGAAGGTCAATA  
CAGTTCGAATTGCAATTAAGGGAACCTATT

>pac.x.6.112

ATATAAAGGAATGGTTCATCAGGATGGAAGACTAGTATCGGTTGCTGTGAAGGTATTGAA  
CCTTCAACAACAAGAAGCATCCAAGACTTTTTATGGCCGAATGCAAAGCATTGAGGAATGT  
CCGGCATCGAAATCTCCTCAAGATCATTACTTCTTGTTCGAGTGCAGGATTTTAAGGGTAA  
TGAGTTTAAGGCTCTAGTTTTGGAGTTCATGCCTAATGGGAGTCTAGAGAGTTGGTTGCA  
CCCAAGGATAGATGGACAACCTCAATTGAGATACTTGAGCATTAGTCAAAGATTGAATAT  
AGCAATTGATGTTGCTTTAGCATTGGATTATCTTCACAACCATTGTCAAATTCCTATTGC  
TCATTGTGATCTAAAACCAAGCAATGTTCTTCTTAATGATGACATGACTGCCCATGTGG  
TGACTTTGGACTAGCCAATTCCTTTATAGGGCTACCAGCAATTTCTGCTGAGGGTCAAAA  
CAGTTTGGCTACAATTAAGGGAACCTATT

>pac.x.6.115

ATATAAAGGAATTTCTTCATCAAGATGGAAGATCGATATTAGTTGCTGTGAAGGTATTGAA

CCTTCAACAACGAGATGGATTCAAGAGTTTCATGACCGAATGCAAAGCATTAAAGGAATAT  
CCGACATCGAAATCTGGTCAAGATCTTAACTTCTCTGCTCGAGTATAGATTTTAAAGATAA  
TGATTTCAAGGCTTTGGTTTTTGGAGTTCATGCCTAATGGAAGTCTAGAGAGCTGGTTGCA  
CCCAAGTACAGAAGGACACCATCAATCAAGATACTTGAATTTTAGCCAAAGACTGAATAT  
AGCAATCGATGTTGCTTTTGCATTGGATTATCTTCATAACCATGCTCAACACCTATTGT  
TCATTGTGATCTAAAACCAAGCAATGTTCTTCTTGATGATGACATGACCGCCCATGTAGG  
TGACTTTGGGCTTGCCAAGATCCTTTCTAGAGCTACTAGCAATTCTGGTGAAGGTCAACA  
CAGTTCAGCTGCATTAAGGGAATATT

>pac.x.6.123

GTATAAAGGGATTTCTTCATCAGGATGAACTATTTGTTGCTGTGAAGGAATTCAACCTTCA  
AGAATGGGGGCTTCCAAGAGTTTCATGGCCGAATGTGAAGCCTTGAGAGAGATCCGGCA  
TCAAAACTTACTCAAGATCTTAACTGCTTGCTCAAGCATAGACATTGAAGGTAATGATTT  
AAAAGCTCTTGTTCCTCAAGCTCATGCCTAATGGGAGTCTTGAAGACTGGTTGCACCCAAA  
TACATATGGAGGACATCTACTCAATAATTTGAGCTTTGGTAAGAGATTAAACATAGCAAT  
TGACGTTGCTTCTGCTTTGGATTATCTTCATCACCATTGCCAACTCCAATTGTTTACCAG  
TGACCTAAAACCAAGCAATGTTCTTCTTGATGATGACATGATTGCCCATGTGGGTGATTT  
TGGGTTAGCAAAGTTCCTTTTCGAAGCTCGACAACCTATTCTGGTAAAAATGAACTAGTTC  
AATTGCTATAAAAGGATCCATC

>pac.x.6.124

GTATAAAGGAATTTCTTCATCAAGATAAACTACCTGTTGCTGTGAAGGTAATCAATCTACA  
AGAACGGGGGCTTCCAAGAGTTTCATGGCTGAATGTGAGATCTTGAGAGAAATTCGGCA  
TCGAAACCTTCTCAAGATATTAGCTTCTTGCTCAACTATTGACTTTCAAGGTAATGATTT  
TAAAGCTCTTGTTCCTCAAGCTCATGCCTAACGGGAGTCTTGAAGGTGGTTGCACCCAAAG  
TACAGATGGACAACATTTGTTGAATTAATTTATGCTTGGGCAAGAGATTAGACATAGCAAT  
TGATATCGCTTCTGCTTTGGATTATCTTCATCACCATAACCAAACCTCCAATTGTTTCACTG  
TGATCTAAAGCCAAGCAACATTTCTTCTTGATGATAGCATGACCGCTCATATGGGTGATTT  
TGGGTTAGCAAAGTTCCTTTCTAAAGACACCAACTTTTCTGATAAAAAATGAACTAGTTC  
AATAGCCATAAAGGGTTCATTT

>pac.x.6.129

TTATAAAGGAATTTTCTTCATCAAGATGGAAGAGCAATATTGATCGCTGTGAAGGTATTGAA  
CCTTCTACAACGAAAAGCATCTAAGACCTTTCATGGCCGAATGCAAAGCATTAAAGGAACAT  
CCGGCATCGAAATCTACTCAAGATCTTAACTTCTTGCTCAAGTATAGATTTTAAAGGTAA  
TGATTTCAAGGCTCTAGTTTTTCGAGTTCATGCCTAATGGGAGTCTAGAGAGTTGGTTACA  
TCCAAGTGTAAACGAACACCATCAATTAAGGTGCCTGAATTTTAGCCAAAGACTTAAACGT  
AGCAATCGATGTTGCTTTTGCATTGGATTATCTTCAAAACCATGCCCCAACACCTATTGT  
TCATTGTGATCTAAAACCAAGCAATGTTCTTTTGTGATGATGACATGACTGCCCATGTGGG  
TGACTTTGGACTTAGCCAAAGTTCCTTTCTATGGCTACCGACAATTTCTGGTGAAGGTCAATA  
CAGTTCAATTGCAATTAAGGGAATATT

>pac.x.7.4

AGGGCTATTGTCTGACGGGACTGTTTCTGCCGTAAAGGTTTTCAACTCGGAATTCGAAGG  
AGTATTTAAGAGTTTTAATGTGGAATGTGAAGTATACCGCAATATTTCGCCACCGAAACCT  
TATCAAAATCATAAGTAGTTGCTCCAATATTGAATTTAGAGCATTGATTCTCGAGTACAT  
GCCTAATGGAAGCCTTGAAAAGTGGTTGTATTCTCAGAATTAATGTTTAAATGTCTTGCA  
AAGACTGGACATTATGATAGATGTTGCATTTGCATTGGAATATCTCCATCACGGTTATTC  
AACATTAGTGGTGCATTGTGACTTAAAGCCAACAACATCTTATTAGATGAAGACATGGT  
TGGGCATGTAGGTGACTTTGGCATCGCAAAGCTCTTCGCAGAAAATGCATCTATCGTACA  
AACCGAGACTCTAGGGACACTG

>pac.x6.52

ATAAAGGAACCTTATCGAATAACACAGAGGTCGCAGTCAAATGCGTAAGCCATGATTCCG  
AGCAAGGGCTAAGAGAATTCATGGCGGAGATCTCAAGCATGGGCAGACTCCAACACAAGA  
ACTTAGTCCACATGAAGGGTTGGTGCAGGAAAGGAAACGAGCTGATGCTGGTCTACAATT  
ACATGTCCAACGGCAGCTCAACCGTTGGATCTTTGATGAGCCCAAGAAGCTCTTGGGGT  
GGAAGGAACGACGACAGTACTAGTTGATGTAGCTGAGGGCTTGAATTATCTGCACCACG  
GATGGGATCAGGTGGTCTTCAACCGTGACATAAAGTCCAGCAACATATTATTGGATTCCG  
AGTTCGGTGGTTCGGTTAGGAGACTTTGGGCTTGCCAAGTTGTACCAACACGGGAAGGAAC  
CGGGTACGACCCGACTGGTGGTACGCTTGGGTACCTGGGCCAGAGTTGGTGAATGTTG  
GAGCTACGGCGGCG

>pac.x6.53

ATAAAGGAACCTTATCGAATAACACAGAGGTCGCAGTCAAATGCGTAAGCCATGATTCCG  
AGCAAGGGCTAAGAGAATTCATGGCGGAGATCTCAAGCATGGGCAGACTCCAACACAAGA  
ACTTAGTCCACATGAAGGGTTGGTGCAGGAAAGGAAACGAGCTGATGCTGGTCTACAATT  
ACATGTCCAACGGCAGCTCAACCGTTGGATCTTTGATGAGCCCAAGAAGCTCTTGGGGT  
GGAAGGAACGACGACAGTACTAGTTGATGTAGCTGAGGGCTTGGATTATCTGCACCACG  
GATGGGATCAGGTGGTCTTCAACCGTGACATAAAGTCCAGCAACATATTATTGGATTCCG  
AGTTCGGTGGTTCGGTTAGGAGGCTTTGGGCTTGCCAAGTTGTACCAACACGGGAAGGAAC  
CGGGTACGACCCGACTGGTGGTACGCTTGGGTACCTGGGCCAGAGTTGGTGAATGTTG  
GAGCTACGGCGGCG

>pac.x6.54

ATAAAGGAACCTTATCGAATAACACAGAGGTCGCAGTCAAATGCGTAAGCCATGATTCCG  
AGCAAGGGCTAAGAGAATTCATGGCGGAGATCTCAAGCATGGGCAGGCTCCAACACAAGA



ACTTAGTCCACATGAAAGGTTGGTGCAGGAAAGGAAACGAGCTGATGCTGGTCTACGATT  
ACATGTCCAACGGCAGCCTCAACCGTTGGATCTTTGATGAGCCCAAGAAGCTCTTGGGGT  
GGAAGGAACGACGCAGAGTACTAGTTGATGTAGCTGAGGGCTTGAATTATCTGCACCACG  
GATGGGATCAGTGGTCCCTCACCGTGACATAAAGTCCAGCAACATATTATTGGATTCCG  
AGTTCCGTGGTTCGGTTAGGAGACTTTGGGCTTGCCAAGTTGTACCAACACGGGAAGGAAC  
CGGGTACGACCCGACTGGTGGGTACGCTTGGGTACCTGGCGCCAGAGTTGGTGAATGTTG  
GAGCTACGGCGGCG

>pac.x6.55

ATAAAGGAACCTATCGAATAACACAGAGGTCGCAGTCAAATGCGTAAGCCATGATTTCGG  
AGCAAGGGCTAAGAGAATTTCATGGCGGAGATCTCAAGCATGGGCAGGCTCCAACACAAGA  
ACTTAGTCCACATGAAAGGTTGGTGCAGGAAAGGAAACGAGCTGATGCTGGTCTACGATT  
ACATGTCCAACGGCAGCCTCAACCGTTGGATCTTTGATGAGCCCAAGAAGCTCTTGGGGT  
GGAAGGAACGACGCAGAGTACTAGTTGATGTAGCTGAGGGCTTGAATTATCTGCACCACG  
GATGGGATCAGTGGTCCCTCACCGTGACATAAAGTCCAGCAACATATTATTGGATTCCG  
AGTTCCGTGGTTCGGTTAGGAGACTTTGGGCTTGCCAAGTTGTACCAACACGGGAAGGAAC  
CGGGTACGACCCGACTGGTGGGTACGCTTGGGTACCTGGCGCCGAGTTGGTGAACGTTG  
GAGCTACGGCGGCG

>pac.pt.4.7

GTGCTCAAGAACAAAATGACAGTCGCTGTGAAACGAAGTGACCCGGGGGAGATCAGGGC  
CTTCTTGAATTCAGAGAGAGATCATCATCTTATCCAGCATTCGCCATCGCCATCTAGTG  
TCACTAATTGGGTATTGTGACGAGCGGTCAGAGATGATACTTGTATTGAATTCATGGAG  
AAGGGTACACTGAGAAGTCATCTTTACAATTCGGATTTGCCTAGTTTGTCTATGGAAGCAG  
AGACTTGATATATGCATTTGGTTCGCAAGAGGCTTTCATTACCTTCACACTGGCGTAGCA  
GGAGGGATCATTACCGTGATATCAAGTCGACTAACATCTTGCCTTGATGAGAATTATGTT  
GCTAAGGTTGCAGATTTCCGTCTTTCAAGGGAAGTGCCTGTTGAGCATAGCCGTGGCGGC  
TATGTAAGCACAGCAGTAAAAGGCACCTTCGGGTATCTTGATCCAGAGTATTTTAAACGG  
CAACAACCTACTGAGAAGTCC

>pac.pt.4.8

GGTGCTTAGAGACAATACAAAAATTGCAGTGAAGCGATGTGTACCGGGCTCTAAGCAGGG  
CCTACCGGAATTCAGACAGAGATCACGGTCTTGTCGAAGATTCGCCACCGACATCTTGT  
TGCCCTTGTGGGTACTGTGAAGAACAATCGGAGATGATACTGGTCTATGAGTACATGGA  
GAAAGGACCATTAAGAAATCATCTATATGGTTCAGAGTTGCCACCTTTGTCTTGGAAGCA  
GAGGCTTGAAATATGCATAGGTTTCAGCCAGGGGTCTTCACTACCTTCATACAGGTTTCAGC  
CCAGGGAATCATCCATCGTGTATGTTAAATCAACCAACATTTTGCCTTGATGAGACTTATGT  
GGCCAAGGTTGCTGATTTCCGTCTGTGCGAGGTTGGCCCATGCATGGATGAGACTCATGT  
TAGCACTGGTGTGAAGGGCAGTTTGGTTATCTGGACCCAGAGTATTTTAAACGGCAACA  
GCTGACAGATAAATCG

>pac.pt.4.11

GACTTGAAGATGGGACCAAGGTGGCTGTCAAGAGAGGAAACCCCTAGATCTGAACAAGG  
TCTTGCCGAGTTCGGACTGAAATTGAGATGTATCCAAGCTCCGCCACCGTCACTTGT  
CTCTCTGATTGGATACTGTGATGAAAGATCAGAGATGATCCTGGTTTATGAGTACATGGC  
AAATGGGACCCCTACGGAGCCATCTTTATGGGACAGACCTCCCATCTCTCTCATGGAGGCA  
AAGACTAGAGATTTGCATTTGGAGTTGCTAGGGGGTTGCATTATCTCCACACGGAAGCAGC  
TCAAAGCATAAATTCACCGAGATGTGAAGTCCGCAACATTTCTCCTAAATGAGAATTTGT  
AGCAAAGGTTGCTGACTTTGGCATTTCAAAGATAGTTTCTGCTCTGGACCAGACCCATGT  
GAGCACTGTTGTTAAGGGTACCTTTGGATACCTGGACCCTGAGTACTTTAGGAGGCAACA  
ACTTACTGAGAAGTCC

>pac.pt.4.13

ACACTGGAAGACGGGACCAAGGTGGCTGTCAAGAGAGGGAACCCAAGATCTGGACAAGGT  
CTTACTGAGTTCAGACTGAAATTGAGTTGTTATCTAAGCTCCGCCATCGCCACCTAGTC  
TCTCTGATTGGATACTGTAACGAAGGATCAGAGATGATCCTGGTTTATGAGTACATGGCA  
AATGGGACCCCTACGGAGACATCTTTGTGGGGCAGACCTCCATCTCTCTCATGGAGGCAA  
AGACTAGAGATTTGCATTTGGAGCTGCTAAGGGGTTGCATTATCTCCACACGGGAGCAGCT  
CAAAGCATAAATTCACCGCATGTGAAGTCTGCCAACATTTCTCCTAAATGAGAATTTGTA  
GCAAAGGTTGCTGACTTTGGCATTTCAAAGATAGTTTCTGCTCTGGACCAGACCCATGTT  
AGCACTGTTGTTAAGGGTACCTTTGGATACCTGGACCCTGAGTACTTTAGGAGGAAACAA  
CTTACTGAGAAGTCC

>pac.pt.4.14

GGTGCTTAGAGACAATACAAAAATTGCAGTGAAGCGATGTGTACCGGGCTCTGAGCAGGG  
CGTACCAGAAATTCAGACAGAGATCACGGTCTTGTCGAAGATTCGCCACCAACATCTTGT  
TGCCCTTATTGGGTACTGTGAAAAACAGTCGGAGATGATACTGGTCTATGAGTACATGGA  
GAAAGGACCATTAAGAAATATTCTATATGGTTCAGAGTTGCCACCTTTGTCTTGGAAGCA  
GAGCTTTGAAATATGCATAGGTTTCAGCCAGGGGTCTTCACTACCTTCACACAGGTTTCAGC  
CCAGGGAATCATCCATCGTGCAGTTAAATCAACCAACATTTTGCCTTGATGAGAATTATGT  
GACCAAGGTTGCTGATTTCCGGCTGTGCGAGGTTGGCCCTGCGTGGACGAGACTCATGT  
TAGCACTGGTGTGAAGGGCAGTTTGGTTATCTGGACCCAGAGTATTTTAAACGGCAACA  
GCTGACAGATAAATCG

>pac.pt.5.102

GGTGCTCAAGAACAAAATGACAGTCGCTGTGAAACGAAGTGACCCGGGGGGAGATCAGGG  
CCTTCTTGAATTCAGAGAGAGATCATCATCTTATCCAGCATTCGCCATCGCCATCTAGT

GTCAC TAATTGGGTATTGTGACGAGCGGT CAGAGATGATACTTGT TTTATGAATTCATGGA  
GAAGGGTACACTGAGAAGTCATCTTTACAATTCGGATTTGCCTAGTTTGT CATGGAAGCA  
GAGACTTGATATATGCATTGGTTCCGCAAGAGGTCTTCATTACCTTCACACTGGCGTAGC  
AGGAGGGATCATTTACCGTGATATCAAGTCGACTAACATCTTGCTTGATGAGAATTATGT  
TGCTAAGGTTGCAGATTTCCGGTCTTTCAAGGGAAAGTGCCTGTTGAGCATAGCCGTGGCGG  
CTATGTAAGCACAGCCGTAAGGCACCTTCGGGTATCTTGATCCAGAGTATTTTAGACA  
TCAACGGTTGACAGAGAAGTCAGATGTGTACTCCTTTGGTGTGGTGCTTCTT

>pac.pt.5.103

AGTCCTGGGAGATGGTACAAAGGTTGCAGTAAAGAGGGGTAATCCCCATCCCAACAGGG  
TCTTGCAGAGTTTCGGACTGAAATCGAAATGTTGTCTCAATTCGCCACCCGCATCTGGT  
CTCACTGATTGGGTATTGTGATGAGCGGAAAGAAATGATCCTAGTTTATGAGTACATGGA  
AAATGGGACCCTTAAGAGTCATTTGTATGGCTCAAATCTTCCCAGCTTGAGTTGGAAGCA  
GAGGCTCGAGATATGCATTGGATCAGCCAGAGGACTTCACTACCTTCATACTGGTTCTAC  
AAAGGCAATTATCCACCGTGATGTTAAGTCTGCCAACATCTTACTTGATGAGAATCTCAT  
GGCCAAGGTTGCTGATTTTGGGCTTTCCAAGACAGGTCCTGAGATCGATCAGACCCATGT  
CAGCACCGCAGTCAAAGGGAGTTTGGGTATCTCGATCCGGAGTATTTT CAGAAGGCAGCA  
ACTGACTGAGAAGTCAGATGTCTACTCATTCCGGAGTGGTTTTTGTTC

>pac.pt.5.104

TGAAATTGATGATGGCACCCTGGTGGCAATCAAGCGGGCCCATCCGCAATCTCAACAAGG  
CCTAAGAGAATTTGAGACAGAGATTGAGATGCTGTCGAAGCTCAGGCATAGGCATCTTGT  
CTCCATGATTGGATTCTGCGAGGAACAGAATGAGATGATCTTGGTGTATGAGTATATGGC  
AAATGGAACCCTTAGGAGTCATCTCTTTGGGAGTGATCTCCCACCCTTAACATGGAAGCA  
GCGGTTAGACGTGTGCATAGGCGCTGCCCGTGGACTCCATTACCTGCACACGGGTGCAGA  
GAGGGGTATAATCCATAGGGATGTTAAGACAACCAACATACTTCTGGATGAGAATTTTGT  
GGCAAAGATGGCTGATTTTGGGTTGTCAAAAACAGGTCCTGCATTGGAGCATACCCATGT  
TAGTACTGCAGTAAAGGGAAGCTTTGGATATCTTGATCCAGAATATTTCCGAAAGCAACA  
TTTACTGAGAGTCTGATGTTTATTCTTTTGGTGTAGTACTGTTT

>pac.pt.5.106

GTGCTCAAGAACAATGACAGTCGCTGTGAAACGAAGTGACCCGGGGGAGATCAGGGC  
CTTCTTGAATCCAGAGAGAGATCATCATCTTATCCAGCATTCCGCATCGCCATCTAGTG  
TCACTAATTTGGGTATTGTGACGAGCGGT CAGAGATGATACTTGT TTTATGAATTCATGGAG  
AAGGGTACACTGAGAAGTCATCTTTACAATTCGGATTTGCCTAGTTTGT CATGGAAGCAG  
AGACTTGATATATGCATTGGTTCCGCAAGAGGTCTTCATTACCTTCACACTGGCGTAGCA  
GGAGGGATCATTCACCGTGATATCAAGTCGACTAACATCTTGCTTGATGAGAATTATGTT  
GCTAAGGTTGCAGATTTCCGGTCTTTCAAGGGAAGTGCCTGTTGAGCATAGCCGTGGCGGC  
TATGTAAGCACAGCAGTAAAGGCACCTTCGGGTATCTTGATCCAGAGTATTTTAGACAT  
CAACGGTTGACAGAGAAGTCAGATGTGTACTCCTTTGGTGTGGTGCTTCTT

>pac.pt.5.107

GAGTTATGGAAGATGGTACAAAGGTTGCAGTAAAGAGGAGTAATCCCCTGTCCCAACAGG  
GTCTTGCAGAGTTTCGGACTGAAATCGAAATGTTGTCTCAATTCGCCACCCGTATCTGG  
TCTCACTGATTGGGTATTGTGATGAGCAGAAAGAGATGATCCTAGTTTATGAGTACATGG  
AGAATGGGACACTCAATAGTCATTTGTATGGCTCCAATTTTCCCAGCTTGAGTTGGAAGC  
AGAGGCTAGAAATATGCATTGGATCAGCCAGAGGACTTCACTACCTTCACACTGGTTTTTC  
CGAAGGATATTATCCACCGTGATGTTAAGTCTGCCAACATCTTACTTGATGAGAATCTCA  
TGGCCAAGGTTGCTGATTTTGGGCTTTCCAAGACAGGTCCTGGGATCGATCAGACCCATG  
TCAGCACGGCGGTTAAGGGGAGTTTGGATATCTCGATCCGGAATATTTT CATAATGCAAC  
GACTGACCGAGAAATCGGATGTCTACTCATT TGGGGTGCTTTTTGTTT

>pac.pt.5.110

AAACGAAGTGAACCGGACGAGATCAGGGCCTTCTCGAATTCAGAGAGAAATCATCATT  
TTATCCAACATTCGCCATCGCCATCTTGTGTACTAATTTGGGTTTGTGACGAGCAATCG  
GAGATGATACTCGTTTTGTGAATTCATGAAAAGGGAACACTGAGGAGTCATCTTTACAAT  
TCGGATTTGCCCTAGTTTGTATGGAAGCAGAGACTTGATATATGCATTGGTTCCGCAAGA  
GGTCTTCATTACCTTCACACTGGCGTAGCAGGAGGATCATTACCGTGATATCAAGTCG  
ACTAACATCTTGCTTGATGAGAATTATGTTGCTAAGGTTGCAGATTTCCGGTCTTTCAAGG  
GAAGTGCCTGTTGAGCATAGCCGTGGCGGCTATGTAAGCACAGCAGTAAAGGCACCTTC  
GGGTATCTTGATCCAGAGTATTTTAGACATCAACGGTTGACAGAGAAGTCAGATGTGTAC  
TCCTTTGGTGTGGTGCTTCTT

>pac.pt.5.113

GGTGCTCAAGAACAATGACAGTCGCTGTGAAACGAAGTGACCCGGGGGAGATCAGGG  
CCTTCTTGAATTCAGAGAGAGATCATCATCTTATCCAGCATTGCCATCGCCATCTAGT  
GTCAC TAATTTGGGTATTGTGACGAGCGGT CAGAGATGATACTTGT TTTATGAATTCATGGA  
AAAGGGAACACTGAGAAGTCATCTTTACAATTCGGATTTGCCTAGTTTGT CATGGAAGCA  
GAGACTTGATATATGCATTGGTTCCGCAAGAGGTCTTCATTACCTTCACACTGGCGTAGC  
AGGAGGGATCATTTACCGTGATATCAAGTCGACTAACATCTTGCTTGATGAGAATTATGT  
TGCTAAGGTTGCAGATTTCCGGTCTTTCAAGGGAAAGTGCCTGTTGAGCATAGCCGTGGCGG  
CTATGTAAGCACAGCAGTAAAGGCACCTTCGGGTATCTTGATCCAGAGTATTTTAGACA  
TCAACGGTTGACAGAGAAGTCAGATGTGTACTCCTTTGGTGTGGTGCTTCTT

>pac.pt.2.202

TCAAGGGTGAATTTGATGATGGCACCCTGGTGGCAATCAAGCGGGCCCATCCGCAATCTC  
AACAAGGCC TAAGAGAATTTGAGACAGAGATTGAGATGCTGTCGAAGCTCAGGCATAGGC

ATCTTGTCTCCATGATTGGATTCTGCGAGGAACAGAATGAGATGATCTTGGTGTATGAGT  
ATATGGCAAATGGAACCCCTTAGGAGTCATCTCTTTGGGGGTGATCTCCCACCATTAACAT  
GGAAGCGACGATTAGATGTATGCATCGGTGCAGCACGTGGACTCCACTACCTCCACACAG  
GGCAGAGAGGAGTACAATCCATAGGGATGTTAAGACAACCAACATACTATTGGATGAGA  
ACTTTGTTGCAAAGATGGCTGATTTTCGGGTTGTCAAAAACCGGCCCTTCATTGGATCATA  
CCCATGTTAGTACTGCAGTAAAGGGGAGCTTTGGATATCTTGTATCCTGAATACTTCCGAA  
GGCAACAATTGACTGAGAAATCTGATGTTTATCTTTTGGTGTAGTACTGTTT

>pac.pt.2.203

ACAAGGGAGTTCTGAGAGATGGTACGAAGGTGGCAGTGAAAAGGGGTAATCCACTGTCCC  
AACAGGGCTTTGCAGAGTTCTGGACTGAAATGAAATGTTATCTCAGCTTCGCCACCGCC  
ATCTGGTCTCAATGATCGGTTACTGTGATGAGCAAAAAGAGATGATCCTTGTTTATGAGT  
ACATGGAAAATGGCACCCCTCAGGAATCATCTTTATGGCTCAGAACTTCCCATCTTGAGTT  
GGAAGCAGAGGCTTGAGATATGCATTGAATCGGCCAGAGGACTTCATTACCTACATACAG  
GTTCCACAAAGGCAATCATTCACCGTGATGTTAAGTCGGCCAACATCTTACTTGATGAGA  
ATCTCATGGCCAAGGTTGCTGATTTTGGGCTTTCAAAGGCAGGTCCCAGATCGACCAGA  
CCCATGTCTCAGACTGCAGTAAAGGGGAGTTTTGGGTACCTTGATCCAGAGTATTTTCAGAA  
GGCAACAGCTGACTGAGAAATCAGATGTGTACTCATTTCGGGGTAGTTTTGTTT

>pac.pt.2.205

TCAAGGGTGAATTTGATGATGGCACCCCTGGTGGCAATCAAGCGGGCCCATCCGCAATCTC  
AACAGGGCTTAAGAGAATTTGAGACAGAGATTGAGATGCTGTGAAGCTCAGGCATAGGC  
ATCTTGTCTCCATGATTGGATTCTGCGAGGAACAGAATGAGATGATCTTGGTGTATGAGT  
ATATGGCAAATGGAACCCCTTAGGAGTCATCTCTTTGGGAATGATCTCCCACCCTAACAT  
GGAAGCAGCGGTTAGACTGTGCATAGGCGCTGCCCGTGGACTCCATTACCTGCACACGG  
GTGCAGAGAGGGGTATAATCCATAGGGATGTTAAGACAACCAACATACTTCTGGATGAGA  
ATTTTGTGGCAAAGATGGCTGATTTCTGGGTTGTCAAAAACAGGTCCTGCATTGGAGCATA  
CCCATGTTAGTACTGCAGTAAAGGGAAGCTTTGGATATCTTGTATCCAGAATATTTCCGAA  
AGCAACATTTGACTGAGAAGTCTGATGTTTATCTTTTGGTGTAGTACTGTTT

>pac.pt.2.207

ATAGGGGTGAATTTGATGATGGCACCCCTAGCGGCAATCAAGCGGGCACATCCACAATCTG  
AACAGGGCTTGGCAGAAATTTGAGACAGAGATTGAGATGCTTTTGAAGCTGAGGCATAGGC  
ACCTGGTCTCCATGATTGGATTCTGTGAGGAGCAGAATGAGATGATCTTGGTGTATGAGT  
ACATGGCAAATGGGACCCCTTAGGAGTCATCTATTTGGGGGTGATCTCCCACCATTAACAT  
GGAAGCGACGATTAGATGTATGCATCGGTGCAGCACGTGGACTCCACTACCTCCACACAG  
GGCAGAGAGGAGTACAATCCATAGGGATGTTAAGACAACCAACATACTTCTGGATGAGA  
ATTTTGTGGCAAAGATGGCTGATTTTGGGTTGTCAAAAACAGGTCCTGCATTGGAGCATA  
CCCATGTTAGTACTGCAGTAAAGGGAAGCTTTGGATATCTTGTATCCAGAATATTTCCGAA  
AGCAACATTTGACTGAGAAGTCTGATGTTTATCTTTTGGTGTAGTACTGTTT

>pac.pt.2.209

ACAAGGGAGTTATGGAAGATGGTACAAAGGTTGCAGTAAAGAGGAGTAATCCCCGTCCC  
AACAGGGTCTTGCAGAGTTTTCGGACTGAAATCGAAATGTTGTCTCAATTCGCCACCGTC  
ATCTGGTCTCACTGATTGGGTATTGTGATGAGCAGAAAGAGATGATCCTAGTTTATGAGT  
ACATGGAGAATGGGACACTCAATAGTCATTTGTATGGCTCCAATTTTCCCAGCTTGAGTT  
GGAAGCAGAGGCTAGAAATATGCATGGATCAGCCAGAGGACTTCACTACCTCACACTG  
GTTTTCCGAAGGATATTATCCACCGTGATGTTAAGTCTGCCAACATCTTACTTGATGAGA  
ATCTCATGGCCAAGGTTGCTGATTTTGGGCTTTCAAAGACAGGTCCTGGGATCGATCAGA  
CCCATGTCTCAGCACGGCGTTAAGGGGAGTTTTGGATATCCCGATCCGGAATATTTTCATAA  
TGCAACGACTGACCGAGAAATCGGATGTCTACTCATTTCGGGGTGTCTTTTGTG

>pac.pt.2.210

ATAGGGGTGAATTTGATGATGGCACCCCTAGCGGCAATCAAGCGGGCACATCCACAATCTG  
AACAGGGCTTGGCAGAAATTTGAGACAGAGATTGAGATGCTTTTGAAGCTGAGGCATAGGC  
ACCTAGTCTCCATGATTGGATTCTGTGAGGAGCAGAATGAGATGATCCTTGGTGTATGAGT  
ACATGGCAAATGGGACCCCTTAGGAGTCATCTATTTGGGGGTGATCTCCCACCATTAACAT  
GGAGGCGACGATTAGATGTATGCATCGGTGCAGCACGTGGACTCCACTACCTCCACACAG  
GGCAGAGAGGAGTACAATCCATAGGGATGTTAAGACAACCAACATACTTCTGGATGAGA  
ACTTTGTTGCAAAGATGGCTGATTTTCGGGTTGTCAAAAACCGGCCCTTCATTGGATCATA  
CCCATGTTAGTACTGCAGTAAAGGGGAGCTTTGGATATCTTGTATCCTGAATACTTCCGAA  
GGCAACAATTGACTGAGAAATCTGATGTTTATCTTTTGGTGTAGTACTGTTT

>pac.Pt.10.301

TCTTGGGGAATTTGGAAGATGGGACTAAGCTCGCCATCAAGCGTGAAATCCTAGATCCGA  
GCAAGGAATTAACGAGTTCCAACAGAAATTCAAATGCTCTCCAAGCTTAGACATCGCCA  
CTTAGTGTCCCTAATTTGGTACTGTGACGAACAATCAGAGATGATCCTTGTCTATGAATA  
TATGGCAAATGGTCTCTCCGTGACCACATTTATGGTCTACCCCTCCCTACATTGTCATG  
GAAACAACGACTAGAGATCTGCATTGGTGTGCCCCGAGGCTGCATTATCTTTCATACAGG  
CGTGCAGAGGGGATTATCCACAGAGACGTAACCAACCAACATCTTCTTGATGAGAA  
CTTGGTTGCTAAGGTCTCGGATTTTGGTCTGTCAAAGACTGCACCCACATTTGGAGCAGAC  
CCATGTTAGTACAGCCGTGAAAGGTAGTTTTGGATATTTGGATCCTGAATACTTTAGAAG  
GCAGCAGCTGACAGAGAAGTCTGATGTGTACTCGTTTGGGGTGTCTTTTCTTTT

>pac.pt.10.306

CAAGGGCGAGATCGATGGTGAAGCACTAAGGTTGCGATCAAGCGTGAAACCCACTCTC  
CGAGCAGGGGGTCCATGAATTCACAAACGGAGATTGAGATGCTCTCAAAGCTTAGACACCG

TCATTTGGTCTCACTGATTGGGACTGTGAAAGAACTGTGAAATGATTCTTGTTTACGA  
TTACATGGCCCATGGGACTCTTCGCGAGCACCTCTACAAGACCCAAAAGCCTCTCTCCC  
ATGGAGACAGAGGCTTGAGATTTGCATTTGGAGCTGCCAGGGGCTTACACTACCTCCACAC  
TGGTGCCAAAACACACTATCATCCATCGAGATGTTAAGACAACAACATTCTTCTGGATGA  
GAAGTGGGTAGCAAAAAGTCTCAGATTTTGGATTGTGCAAGACAGGCCAACATTGGATCA  
TACGCATGTAAGTACTGTTGTGAAGGGTAGTTTTGGGACTTGGATCCGGAGTATTTTAG  
GCGGCAGCAATTGACAGACAAATCAGATGTGTACTCATTCCGGAGTTGTTTTGTTT

>pac.pt.10.309

TCTTGGGGAATTGGAAGATGGGACTAAGCTCGCCATCAAGCGTGGAAATCCTAGATCCGA  
GCAAGGAATTAACGAGTTCCAAACAGAAATCAAATGCTCTCCAAGCTTAGACATCGCCA  
CTTAGTGTCCCTAATTGGGACTGTGACGAACAATCAGAGATGATCCTTGTCTATGAATA  
TATGGCAAATGGTCTCTCCGTGACCACATTTATGGTTCTACCTCCCTACATTGTCATG  
GAAACAACGACTAGAGATCTGCATTGGTGTGCGCGAGGCCGTCATTATCTTCATACAGG  
CGCTGCGCAGGGGATTATCCACAGAGACGTAAAACACAAACATTCTTCTTGATGAGAA  
CTTGGTTGCTAAGGTCTCGGATTTTGGTCTGTCAAAGACTGCACCCACATTGGAGCAGAC  
CCATGTTAGTACAGCCGTGAAAGGTAGTTTTGGATATTTGGATCCTGAATACTTTAGAAG  
GCAGCAGCTGACAGAGAAGTCTGATGTGTACTCGTTTGGGGTTGTTCTTTTC

>pac.pt.10.310

TCTTGGGGAATTGGAAGATGGGACTAAGCTCGCCATCAAGCGTGGAAATCCTAGATCCGA  
GCAGGGAATTAACGAGTTCCAAACAGAAATCAAATGCTCTCCAAGCTTAGACATCGCCA  
CTTAGTGTCCCTAATTGGGACTGTGACGAACAATCAGAGATGATCCTTGTCTATGAATA  
TATGGCAAATGGTCTCTCCGTGACCACATTTATGGTTCTACCTCCCCACATTGTCATG  
GAAACAACGACTAGAGATCTGCATTGGTGTGCGCGAGGCCGTCATTATCTTCATACAGG  
CGCTGCGCAGGGGATTATCCACAGAGACGTAAAACACAAACATTCTTCTTGATGAGAA  
CTTGGTTGCTAAGGTCTCGGATTTTGGTCTGTCAAAGACTGCACCCACATTGGAGCAGAC  
CCATGTTAGTACAGCCGTGAAAGGTAGTTTTCGGATATTTGGATCCTGAATACTTTAGAAG  
GCAGCAGCTGACAGAGAAGTCTGATGTGTACTCGTTTGGGGTTGTTCTTTTC

>pac.ptd.5.2

GGTGCTCAAGAACAATAATGACAGTTCGCTGTGAAACGAAGTGACCCGGGGGAGATCAGG  
GCCTTCTTGAATCCAGAGAGAGATCATCATCTTATCCAGCATTGCGCATCGCCATCTAG  
TGTCACTAATTGGGTATTGTGACGAGCGGTGACAGAGATGATACTTGTATTATGAATTCATGG  
AAAAGGGAACACTGAGAAGTCACTTTTACAATTCGGATTTGCCTAGTTTGTTCATGGAAGC  
AGAGACTTGATATATGCATTGGTTCGCAAGAGGTCTTCATTACCTTCACACTGGCGTAG  
CAGGAGGGATCATTACCGTGATATCAAGTCGACTAACATCTTGCTTGATGAGAATTATG  
TTGCTAAGGTTGCAGATTTCCGGTCTTTCAAGGGAAGTGCCTGTTGAGCATAGCCGTGGCG  
GCTATGTAAGCACAGCAGTAAAAGGCACCTTTGGGTATCTTGATCCAGAGTATTTTAGAC  
ATCAACGGTTGACAGAGAAGTCTGATGTGTACTCCTTTGGTGTGGTGCCTTCTT

>pac.ptd.5.5

GGTGCTCAAGAACAATAATGACAGTTCGCTGTGAAACGAAGTGACCCGGGGGAGATCAGGG  
CCTTCTTGAATCCAGAGAGAGATCATCATCTTATCCAGCATTGCGCATCGCCATCTAGT  
GTCATAAATTGGGTATTGTGACGAGCGGTGACAGAGATGATACTTGTATTATGAATTCATGGA  
GAAGGGTACACTGAGAAGTCACTTTTACAATTCGGATTTGCCTAGTTTGTTCATGGAAGCA  
GAGACTTGATATATGCATTGGTTCGCAAGAGGTCTTCATTACCTTCACACTGGCGTAGC  
AGGAGGGATCATTACCGTGATATCAAGTCGACTAACATCTTGCTTGATGAGAATTATGT  
TGCTAAGGTTGCAGATTTCCGGTCTTTCAAGGGAAGTGCCTGTTGAGCATAGCCGTGGCGG  
CTATGTAAGCACAGCAGTAAAAGGCACCTTTGGGTATCTTGATCCAGAGTATTTTAGACA  
TCAACGGTTGACAGAGAAGTCTGATGTGTACTCCTTTGGTGTGGTGCCTTCTT

>pac.ptd.8.21

CAAAGGGGTGCTCAAGAACAATAATGACAGTTCGCTGTGAAACGAAGTGACCCGGGGGAGA  
TCAGGGCCTTCTTGAATCCAGAGAGAGATCATCATCTTATCCAGCATTGCGCATCGCCA  
TCTAGTGCCACTAATTGGGTATTGTGACGAGCGGTGACAGAGATGATACTTGTATTATGAATT  
CATGGAAAAGGGAACACTGAGAAGTCACTTTTACAATTCGGATTTGCCTAGTTTGTTCATG  
GAAGCAGAGACTTGATATATGCATTGGTTCGCAAGAGGTCTTCATTACCTTCACACTGG  
CGTAGCAGGAGGGATCATTACCGTGATATCAAGTCGACTAACATCTTGCTTGATGAGAA  
TTATGTTGCTAAGGTTGCAGATTTCCGGTCTTTCAAGGGAAGTGCCTGTTGAGCATAGCCG  
TGGCGGCTATGTAAGCACAGCAGTAAAAGGCACCTTTGGGTATCTTGATCCAGAGTATTT  
TAGACATCAACGGTTGACAGAGAAGTCTGATGTGTACTCCTTTGGTGTGGTGCCTTCTT

>pac.ptd.8.22

TAGGGGTGAAATTTGATGATGGCACCTAGCGGCAATCAAGCGGCACATCCACAATCTGA  
ACAAGGGCTGGCAGAATTTGACAGAGAGATTGAGATGCTTTGCAAGCTGAGGCATAGGCA  
CCTAGTCTCCATGATTGGATTCTGTGAGGAGCAGAATGAGATGATCTTGGTGTATGAGTA  
CATGGCAAATGGGACCTTAGGAGTCACTATTTGGGGGTGATCTCCACCATTAAACATG  
GAGGCAGCATTAGATGTATGCATCGGTGCAGCAGTGGACTCCACTACCTCCACACAGG  
GGCAGAGAGGAGTACAATCCATAGGGATGTTAAGACAACCAACATACTCTTGGATGAGAA  
CTTTGTTGCAAAGATGGCTGATTTCCGGTGTCAAACACCGGCCCTTCATTGGATCATA  
CCATGTTAGTACTACAGTAAAGGGGAGCTTTGGATATCTTGATCCTGAATACTTCCGAAG  
GCAACAATGACTGAGAAATCTGATGTTTATTCTTTTGGTGTAGTACTGTTT

>pac.ptd.8.23

CAAGGGAGTTATGGAAGATGGTACAAAGGTTGCAGTAAAGAGGAGTAATCCCTGTCCCA  
ACAGGGTCTTGGCGAGTTTCGGACTGAAATCGAAATGTTGTCTCAATTCCGCCACCGTCA

TCTGGTCTCACTGATTGGGTATTGTGACGAGCAGAAAGAGATGATCCTAGTTTTATGAGTA  
CATGGAGAATGGGACACTCAATAGTCATTTGTATGGCTCCAATTTTCCCAGCTTGAGTTG  
GAAGCAGAGGCTAGAAATATGCATTTGGATCAGCCAGAGGACTTCACTACCTTCATACTGG  
TTTTCCGAAGGCTATTATCCACCGTGATGTTAAGTCTGCCAACATCTTACTTGATGAGAA  
TCTCATGGCCAAGTTGCTGATTTTTGGGCTTTCCAAGACAGGTCTGGGATCGATCAGAC  
CCATGTCAGCACGGCGGTTAAGGGGAGTTTTGGATATCTCGATCCGGAATATTTCAATAAT  
GCAACGACTGACCGAGAAATCGGATGTCTACTCATTTGGGGTGCTTTTGT

>pac.ptd.9.41

TAAAGGAGTTGTTGATGGAGGGCTCAAGGTAGCCATTAAGAGCAAACCCATCTTCAGA  
ACAGGGAGTTCATGAGTTCAGACCCGAAATGAGATGCTTTCTAAGCTAAGACACAGGCA  
TTTAGTCTCTCTGATTGGGTACTGTGAAGAAAATGAAGAGATGATCTTGGTTTTATGATTA  
CATGGCTTATGGGACTCTAAGGGAGCATCTCTATAAGAGCAACAAGCCTACTCTTTCATG  
GAAACAGAGGCTAGAAATCTGTATCGGGGCTGCAAGGGGACTCCACTACCTTCATACTGG  
TGCAAAGTACACCATCATCCACAGGGACGTAAAGACCACGAACATCTCTTGGATGAGAA  
CTGGGTAGCCAAAGTTTTCAGATTTTTGGGCTCTCAAAAACGGGTCCCAACCTCAACCAGAC  
CCACGTTAGTACAGTGGTGAAGGGTAGTTTTGGCTACTTGGATCTTGAGTACTTCAGACG  
CCAGCAATTGACAGAGAAATCTGATGTATACTCATTTGGGGTGTCTCTCTTT

>pac.Erf.2

TCAGCTTCGAAGTGGCCGTCTATGTAGCGGTAAAGATGTTAGGCAAGTCCAAAGGTAATGG  
CCAAGAATTCATCAATGAAGTCGCCACCATTGGGAGGATTCATCATGTTAATGTGGTGCG  
ACTTATTGGATTCTGTTCAAACGGATCAAACGGGCTCTGATTATGAATTCATGCCTAA  
TGGGTCTTTAGAAAAGTATACCTTTTCCCAAGAAAAGAAGAAAGACTCTCACTGAGTTG  
GGATAAAAATGTATGAGATGCCCTAGGAGTTGCTCGTGGGATTGAGTATTTACATCGAGG  
ATGTGACATTCAAATTTTACATTTTGGATATCAAGCCCCACAACATCTTCTTGATGAGAA  
CTTTGTTCCAAAGATTTCTGACTTTGGGCTCGCAAATTTCTATCCAATAAATGATAATAC  
TATCACTCTTACTGCAGCAGGGAACA

>pac.Erf.3

AACTCTTGATCATGGGGAAACAATTGTTGCAGTAAAGGTACTCAACCTTCAGCAACAAGG  
AGCTTCCAAGAGTTTTATGGCGGAGTGTGAAGCCTTGAGAAATATTCGACACCGTAATCT  
TGTCAGATCTTAACCATTTGCTCAAGCATGGATTTCAAAGGAAATGATTTCAAAGCTCT  
AGTTTTTCAGATTCATCCCTAATGGGAATTTGGAGAGATGGTTCATCCTGAAACATATCA  
TACACAAGATGAATTGGGAAATTTGAACTTCCCTCAAAGGCTAAAACATTGCCATTGATGT  
GGCTTCCGCTTTGGAATATCTTCATCACAACTGTCCAACACCAATCATCCATTGTGATCT  
AAAGCCAAGCAACATTTCTTCTTGATAATGACATGACTGCCCATGTGGGTGACTTTGGGTT  
ATCAAGGCTCCATTTAGAGACGAGCAATAGATCTTCTCAAAATCAAACAGCTCGATTGG  
AATAAGAGGATCT

>pac.Erf.4

AATTCTTCATCAAGATGGAAGACCAGTAACATTTGCTCTGAAGGTGTTGAACGTTCAACA  
ACAAGGAGCATCCAAGACTTTTTATGGCAGAATGCAAAGCATTGAGAAATATTCGACATCG  
AAATCTTCTCAAGATCATAACTTCTTGCTGAGCGTGGATTTTTATGGGTAATGATTTCAAG  
GCTCTAATTTTTGAGTTTATGACTAATGGGAATCTAGAGAGTTGGTTCACCCAAAATATC  
GACGGACAACATCAATCTAGATACTTGAACATAAGCCAAAGACTGGACATGGCAATGGAT  
GTTGCTCTGCATTAATATCTTCATAACCAATGTCCAACACCAATTTGTTCAATGTGAT  
CTAAAACCAAGCAATGTTCTTCTTGATGATGATATGTCTGCCATGTGGGTGACTTTGGA  
CTTGCTAAGTTCCCTTTTTAGGGCTCCCAGCGATTCTGGTGAAGTCAATACAGTTCAGTT  
GCAATTAAGGGTACT

>pac.Erf.5

AATTCTTGGTAAACGGTGAACAATTTGTTGCAGTGAAGGTACTCAACCTTCAACAACAAGG  
AGCTTCCAAGAGTTTTCATGGCCGAGTGTGAAGCCTTGAGAAACATTCGACATCGAAATCT  
TGTCAGATCTTAACACTTGTCTCAAGCAGTATTTTGAAGGAAATGATTTTTAAGTCTCT  
AGTTTTTGGATTTCATGCCCAATGGGAGTTTGGAGAAATGGTTCATCCGGGAGCAGATGA  
TGCACAAGATGGATTGATGAATATAAACCTTCTCCAAAGGTTAAACATTGCAATTGATGT  
AGCTTCTGCCTTGAATATCTTCATCACCACTGTCAAATACCAATCATTCATTGTGATTT  
AAAACCAACAACATTTCTTCTTGATAACGACATGACTGCCCATGTGGGTGATTTGGGTT  
ATCAAGGTTTCTTCCAGAGGCAACCAATGCATTTTCTCAAACCATAGCAGCTCAATTGG  
TATAAGAGGATCT

>pac.Erf.6

ACTTCTAAATCAGGGTGAACAATTTGTTGCAGTGAAGGTATTCAACCTTCCACAACATGG  
AGCCTCTAAAAGTTTCATGGCTGAGTGTGAATCCTTGAGAAACATCCGGCATCGGAATCT  
CGTCAAGGTTATAACTTCTGCTCGAGTATAGATTTTGGCGGCAATGATTTCAAAGCTCT  
AGTTTACGAGTTTATGAGTAATGGAAGTTTAGAGAGGTGGTTATATCCAAATGCAGAAGT  
GGCACAAGTTGAACAAGGAAATTTAAATATTTCTCAAAGACTTAACACTGCCATTGATGT  
TGCTCTGCCTAGATTTATCTTCATCACAACTGTAACAACCAATCATTCATTGTGATCT  
AAAGCCAACAACATTTCTTCTTGATGACGACATGGTTGCTCACGTGGGTGATTTGGTTTT  
ATCAAGATTTCTCCCAATGACGATTAATAATTTCTCAAAGTCAAACAGCTCTATTGGAAT  
AAAAGGATCC

>pac.Erf.7

AATATTTTCATCAAGATGGAAGATCGGTATCAGTTGCTGTTAAGGTGTTGAACCTTCAACA  
ACGAGAAGCATCCAAGACTTTTCATGGCTGAATGCAAAGCATTAAAGAAATATCAGGCATCG  
AAATCTTCTCAAGATCTTAACCTTCTGTTCAAGTGTAGATTTTAAAGGTAATGATTTCAA

GGCTCTAGTCTTGGAGTTCATGTCTAATGAGAGTCTAGAGAGTTGGTTGCACCCAAATAT  
AGATGAACACCATCAATCAAGATACTTGAATTTTAGCCAAAGACTGAACATAGCAATTGA  
TGTGTCTCTTGCATTTGGATTATCTTCATAACAATTGTCCAACACCTATTGTTTCAATTGTGA  
TCTAAAACCAAGCAATGTTCTTCTTGTGATGATGAAATGACTGCCCATGTGGGTGACTTTGG  
ACTCGCCAAGTTCCTTTCTAGGGCTACCAGCAATTCTGGTGAAGGTCAACACAGCTCAGT  
TGCAATTAAGGGAAT

>pac.Erf.9

TCAGCTTCGAAGTGGCCATCATGTGCGGGTAAAGATGTTAGGCAAGTCCAAAGGTAATGG  
CCAAGAATTCATCAATGAAGTCGCCACCATTGGGAGGATTCATCATGTTAATGTGGTGCA  
ACTTATTGGATTCTGTTCAAACGGATCAAAACGGGCTCTGATTTATGAATTCATGCCTAA  
TGGGTCTTTAGAAAAGTATACCTTTTCCCAAGAAAAAGAAGAAAGACTCTCACTGGGTTG  
GGATAAAATGTATGAGATTGCCCTAGGAGTTGCTCGTGGGATTGAGTATTTACATCGAGG  
ATGTGACATTCAAAATTTTACATTTTGTATCAAGCCCCACAACATTCTTCTTGTGATGAGAA  
CTTCGTTCCAAAGATTTCTGACTTTGGGCTCGAAAATTTCTATCCAATAAATGATAATAC  
TATCACTCTTACTGCAGCACGAGGAACA

>pac.Erf.10

AATTCTTGGTAAACGGTGAACAATTGTTGAGTGAAGGTAACCTTCAACAACAAGG  
AGCTTCCAAGAGTTTCATGGCCGAGTGTGAAGCCTTGAGAAACATTTCGACATCGAAATCT  
TGTCAAGATCTTAACTACTTGTCAAGCACTGATTTTGAAGGAAATGATTTTAAAGCTCT  
AGTTTTTGTGATTCATGCCCAATGGGAGTTTGGAGAAATGGTTGCATCCGGGAGCAGATGA  
TGCACAAGATGGATTGATGAATATAAACCTTCTCCAAAGGTTAAACATTGCAATTGATGT  
AGCTTCTGCCCTTGAATATCTTCATCACCCTGTCAAATACCAATCATTCATTTGTGATTT  
AAAACCAACAACATTTCTTGTGATAACGACATGACTGCCCATGTGGGTGATTTTGGGTT  
ATCAAGGTTTCTTCTGAGGCAACCAATGCATTTTCTCAAACCATAGCAGCTCAATTGG  
TATAAGAGGATCT

>pac.Erf.11

AATGGTTCATCAGGATGGAAGACTAGTATCGGTTGCTGTGAAGGTATTGAACCTTCAACA  
ACAAGAAGCATCCAAGACTTTTATGGCCGAATGCAAAGCATTGAGGAATGTCCGGCATCG  
AAATCTCCTCAAGATCATTACTTCTTGTTCGAGTGGGATTTTAAAGGTAATGAGTTTAA  
GGCTCTAGTTTTGGAGTTTCAATGCCTAATGGGAGTCTAGAGAGTTGGTTGCACCCAAAGGAT  
AGATGGACAACCTTCAATTTAGATACTTGTGACATTAGTCAAAGATTGAATATAGCAATTGA  
TGTTGCTTTAGCATTGGATTATCTTCAACAACCATTTGTCAAATTCCTATTGCTCATTTGTGA  
TCTAAAACCAAGCAATGTTCTTCTTAATGATGACACGACTGCCCATGTTGGTGACTTTGG  
ACTAGCCAAATTCCTTTATAGGGCTACCAGCAATTCTGCTGAGGGTCAAACAGTTTGGC  
TACAATTAAGGGAAT

>pac.Erf.13

GAGGCTTGTTCGACGGACGTTTTGGTTGCGGTTAAAGTCTTGAATGAATCCAAAGGTAAAGG  
GGATGATTTTCATTAACGAGGTCCTACCATCGGCAGGACAAACCACCATAATATTGTTTCG  
TCTATTGGGCTTCTGTTCTGAAGGGTCCAAAAGAGCTCTAATCTATGAATTCATGTCCAA  
TGGATCTCTTGAATAATTCATTTATGTTGACAAACCAAGGATGACACAACCTTTAGCATG  
GGAAAACCTTTACCAAAATGGCATTGGCATTGCCAAGGGACTTGAGTACTTGCACCGTGG  
TTGTAACACCCATATTTTACATCTTGCATAAAAACCTCATAACATTTCTTTAGATGAGAA  
ATTTTGTCTTAAGATCTCAGACTTTGGGTTAGCTAAACAATGCCTCACAGGAGAGAGTGC  
AGTATCTTTGCATGGGGCTCGAGGGACT

>pac.Erf.14

AGTTCTACGGGAAGATGAAGCTGTTGTTGCCGTTAAGGTATTGAATCTTCAACAACATGG  
AGCTTCCAAGAGTTTCATATCTGAATGCAAAACCTTGACAAACATTTCGGCATCGTAATCT  
TGTCAAGATCTTACTGCTGCTCAAGTGTGGATTTTAGGATGAATGATTTCAAAGCTCT  
GGTTTTTGTGATTCATGTCAAATGGGAACCTTAGACGAGTGGTTGCATCCAAGAATTGGTGG  
GCAACATCAGCTTAAGAGTTTTGAGCCTAATTTCAAAGGTTAAACATAGCCATTGATGTGGC  
TTCTGCACCTGGAATATCTTCAATTTCCATTGCCAAATTCCTATTGTTTATTGATCTAAA  
ACCAAGCAATGTGCTTCTTGAAGATATGACTGCCCATGTTGGTGACTTCGGACTAGC  
ACGGTTCTCTTTGAAACATCCAATATTTCTCCAAAATCAAACCATATCGGCCGGGCT  
AAAGGGTTCT

>pac.Erf.2B.210

AGCCTTATCAAATGGCCGAGAGGGTCTGTTGCTGTCAAAGACTAGAGAATGTGGTGAAT  
GGAGGAGAAAAGGAGTTTTAGAAATGAGATGACATCCATTGGGAGAACTTATCATAGAAAT  
CTAGTCCGATTGCTAGGTTATTGCCAAGATGGTCATCAAAGGCTTCTCGTGTACGAGTAC  
ATGAGCAAAGGATCACTCGCGGACTTCTCTTTAAACCCGATTGTCCCCAAGTTGGGAC  
GAAAGAGTGCGAATCGCTCTAGACATAGCTAGAGGTATCCTATATCTGCATGAAGAATGT  
GAAACTCAAATCATCCACTGTGACATAAAACCTCAAACATACTCATGGATGAGTACCAG  
TGTGCGAAGATTGCCGATTTTGGACTCGCAAAGCTGCTGAAGCCAGACCAAACCTAGGACT  
TTCCTACTGGGATCCGAGGAACAAGAGGGTATGTTGCTCCCGAGTGGCATCGCAACTTGCC  
ATAACAGTGAAA

>pac.Erf.2B.211

AATCTTATCAAGTAGCCAGAAGGTTGTTGCTGTCAAAGACTAGAGAATATGGTGAAGA  
AGGAGAAAATGAGTTTTCAGAAATGAGATGACAAACGATCGGGAGAACTCATCACAGAAATCT  
AGTCCGACTTCTAGGTTACTGCCATGAGGGTACTAATAGGCTTCTTGTGTACGAGTACAT  
GAGCAACGGATCACTCGCGGACTTCTCTTTAAATACGAAAGGCATCAAATTTGGGACGA  
AAGAGTGGGAATTGCTCTACACATAGCTAGAGGTATCCTTTATTGTCATGAAGAGTGTGA

AACCCAGATCATTTCATTGTGACATAAAACCTCAAACATACTCATAGATGAGTATCGTTG  
TGCAAAGATAGCCGACTTCGGACTTGCGAAACTGCTGAAGCCAAACCAAAGCATGACCTC  
CACTGGGATCAGAGGGACAAGGGGTATGTTGCGCCCGAGTGGCACCAGAACATGCCCAT  
AACTGTGAAG

>pac.W.ArA.3

TATGCTGAGAACCcAAATCCTTGGTTCGTGGAGGCTATGGCACCGTATACAAAGGAATTTTA  
GCAGACCACAGAACAGTGGCTGTAAAAAATCCAAAATAGTGGATCAGAGCCAAATTGAG  
CAATTCATAAATGAAGTTGTTATCTCTCTCAGATCAACCATCGGAATGTGGTGAGACTT  
CTAGGATGTTGTTTGGAGACTGAGGTCCCTCTACTAATTTATGAGTTTATCAACAATGGA  
ACCTCTCGCACCATATCCATGATGAGAGTCATATATCCTCAATTTCTTGGGGATGTCGT  
TTGAGGATAGCTACAGAAAACGCGGAAGCACTTGCTTATCTACATTCTGCAGCTTCTCCA  
CCAATCATTACAGGGATATTAAGTCTACTAACATACTCTTGGATGAAGATTACACGGCT  
AAAATAGCAGACTTTGGAGCTCAAGGTTGGTTCCTCTTGATTACACACAATTGACTACA  
TTAGTACAAGGGACGTTGGGGTACTTGGACCCAGAATATTTTCATTCAAGTCAATTAACT

>pac.W.ArA.4

TTCTCGGAGAAGAATTTAATCGGGGGTGGCGGGTTCGGAGTTGTGTATAAGGGGACCTTA  
TCGGATGGAACCTTGGGTTGCTGTGAAGAGGATCATAGAGTCAGATTTTCATGGTGATGCG  
GAGTTCTGCAATGAAGTTGAGATCCTTAGCAATTTGAAGCACCGGAATCTCGTCTGCTA  
AGAGGCTGCTGTATGACAGATGAAGAGAGCAGCAAACAGAGGTATCTGGTGTACGAGTAT  
ATGCCCAATGGGAACCTGAAGGATCATCTCTTCTTGTAGACAAGCAACCGCTGAGTTGG  
CCCCAAAGGAAGAGCATAATCTTGGATGTGGCCAAGGGGATTGCTATCTTCATTATGGA  
GTGAAACCTGCAATCTATCACAGAGACATCAAGCCACTAACATACTCTTGGATGCAGAT  
ATGAAAGCAAGAGTGGCAGATTTTGGGCTAGTCAAGCAGAGCAGAGAAGGACAGTCCCAG  
CTCATCACCAGAGTCGCTGGCACACACGGCTACCTAGCTCCGGAATATGCCCTCTATGGG  
CAGTTGACT

>pac.W.ArA.5

TTCTCTCAGAAGAATTTAATCGGGCGTGGCAGCTTTGGAGTTGTGTATAAGGGGATCCTA  
CCGGATGGAACCTTGGGTTGCTGTGAAAAAGATCACAGAGTCAGATTTTCAAGGTGATGCT  
GAGTTCTGCAATGAAGTTGAGATCATTAGCAATTTGAAGCACCGGAATCTTGTCCCGCTT  
AGAGGCTGCTGTGTGATAGATGGGGATTGTGATGAAGGGAGCGGCAACAGAGGTATCTG  
GTGTACGAGCATATGCCCTATGGGAACCTCGAGGATCATCTCTTCTTGTGCAACCCACAC  
AGTGGAAATATTCACAAGCAACCTCTGAGTTGGCCCCAAAGAAAGAGCATAATCTTGGAT  
GTGGCCAAGGGGATTGCCCTATCTTCACTATGGAGTGAAACCTGCAATATATCATAGAGAC  
ATCAAGCCTACGAACATACTTTTGGATGCAGATATGAAAGCAAGAGTGGCAGACTTTGGG  
CTAGTCAAGCAAAGCAGAGAAGGACAGTCCCATCTCATCACCAAAAGTTGCTGGCACACAT  
GGCTACCTAGCTCCGGAGTATGCTCTCTATGGGCAGTTAACT

>pac.W.ArA.6

TATGCTGAGAACCcAAATCCTTGGTTCGTGGAGGCTATGGCACCGTATACAAAGGAATTTTA  
GCAGACCACAGAACAGTGGCTGTAAAAAATCCAAAATAGTGGATCAGAGCCAAATTGAG  
CAATTCATAAATGAAGTTGTTATCTCTCTCAGATCAACCATCGGAATGTGGTGAGACTT  
CTAGGATGTTGTTTGGAGACTGAGGTCCCTCTACTAATTTATGAGTTTATCAACAATGGA  
ACCTCTCGCACCATATCCATGATGAGAGTCATATATCCTCAATTTCTTGGGGATGTCGT  
TTGAGGATAGCCACAGAAACTGCGGAAGCACTTGCTTATCTACATTCTGCAGCTTCTCCA  
CCAATCATTACAGGGATATTAAGTCTACTAACATACTCTTGGATGAAGATTACACGGCT  
AAAATAGCAGACTTTGGAGCTCAAGGTTGGTTCCTCTTGATCACACACAATTAACTACA  
TTAGTACAAGGGACGTTGGGGTACTTGGACCCAGAATATTTTCATTCAAGTCAATTAACT

>pac.W.ArA.7

TATGCTGAGAATCGAATCCTTGGTTCGTGGAGGCTATGGTACCGTATACAAAGGAATTTTA  
GCAGACCACAGAATAGTGGCTGTAAAAAATCCAAAATAGTGGATGAGAGCCAAATTGAA  
CAATTCATAAATGAAGTTGTTATCTCTCTCAGATCAACCATAGGAATGTGGTGAGACTT  
CTAGGTTGTTGTTTGGAGACTGAGGTCCCTTTATTAATATATGAGTTCATCAACAATGGA  
ACCTCTTCCATCATATCCATGATGAAGGTCATGTATCATCAATTTTCATGGGGAAAGTCGT  
ATGAGGATAGCTGCAGAACTGCAGGAGTACTTGCTTATCTTCACTCTGCAGCTTCTATA  
CCAATCATTCTAGGGATATTAAGTCTACTAACATACTCTTAGACGAAAAGTACACAGCT  
AAGGTGGCAGACTTTGGAGCTCAAGGTTGGTTCCTTTAGATCAGACTCAATTGACTACA  
TTAGTACAAGGAACGCTCGGTTACTTGGACCCAGAATACTTTAACTCGAGTCAACTAACG

>pac.W.ArA.8

TATAATGAGAACCcGAATTCCTTGGTCAAGGAAGTCAAGGTACGGTATATAAAGGCATGTTA  
CCAGATGGGAGAATCGTAGCAATTAAGAAGTCCAAACTAGTAAATGAAGGCCAAATTGAG  
CAATTCATTAATGAGCTTGCCATACTTTCCCATATCAACCACGAAACGTTGTTAAATTG  
TTAGGTTGTTGTTTGGAGACAGAAGTTCCTCTACTTGTTTACGAGTTTATTTCCAACGGA  
ACCTTTTCTATCATATCCATGAAAAAAGTGAAGAGTTCCTAAGTTCATGGGATAATCGC  
TTAAGAATTGCTACAGAAGTTGCAGGTGCACTTGCTTACTTGCAATTGAGGCTTCAATA  
CCAATTTATCATAGAGACATCAAGTCTACCAACATACTCATAGATGGTAAATACACAGCT  
AAAGTCTCAGACTTTGGTATTTCAAGGTCGTTCCAATTGATAAAAACACACCTAACTACA  
TCAGTCCAAGGGACTTTTGGTTACATGGATCCAGAGTATTTCCAATCAAACCAATTCA  
>pac.W.ArA.9

>pac.W.ArA.9

TATAATGAGAACCcGAATTCCTTGGTCAAGGAGGCCAAGGTACAGTATACAAAGGTATGCTA  
CCAGATGGAAGAATGTAGCAATTAAGAAATCCAAAATAGTGAATGAGGGTCAAATCGAA  
CAGTTCATTAATGAGGTTGTCATACTTTCTCATATCAACCACAAGAACGTTGGTTAAATTG

TTGGGTTGTTGTTGGAGACAGAAGTTCCTTTACTTGTATTGAGTTCATCTCCAATGGA  
ACCCTTTTCCATCACATCCATGTCCAAAGTGAGGAATTCCAATGTTTCATGGGACAAATCGG  
TTAAGAATTCATAGAACTTGCAAATGCACCTGCCTATTTGCATTCAGCAGCTTCATA  
CCAATCTATCATAGAGATATCAAGTCTACCAACATACTATTAGATAGTAAATATACGGCT  
AAAGTATCAGACTTTGGGATTTCAAGGTCCGTCCAAACGATAAACTCACTTAACCACA  
TTAGTCCAAGGGACCTTTGGATACTTGGATCCAGAGTATTTCCAGTCAAGTCAATTCACA  
>pac.W.ArA.11

TATGCTGAGAACCcAAATCCTTGGTCGTGGAGGCTATGGCACCGTATACAAAGGAATTTTA  
GCAGACCACAGAACAGTGGCTGTAAAAAATCCAAAATAGTGGATCAGAGCCAAATGAG  
CAATTCATAAAATGGAGTTGTTATCTCTCTCAGATCAACCATCGGAATGTGGTGAGACTT  
CTAGGATGTTGTTGGAGACTGAGGTCCCTCTACTAATTTATGAGTTTATCAACAATGGA  
ACCCTCTCGCACCATATCCATGATGAGAGTCAATATATCCTCAATTTCTTGGGGATGTCGT  
TTGAGGATAGCTACAGAACTGCGGAAGCACTTGCTTATCTACATTCTGCAGCTTCTCCA  
CCAATCATTCACAGGGATATTAAGTCTACTAACATACTCTTGGATGAAGATTACACGGCT  
AAAATAGCAGACTTTGGAGCTTCAAGGTGGTTCCTCTTGATCACACACAATTAAC TACA  
TTAGTACAAGGGACGTTGGGGTACTTGGACCCAGAATATTTTCATTCAGTCAATTAAC T

>pac.W.ArA.12  
TTCTCTCAGAAGAATTTAATCGGGCGTGGCAGCTTTGGAGTTGTGTATAAGGGGATCCTA  
CCGGATGGAACCTTGGGTTGCTGTGAAAAAGATCACAGAGTCAGATTTTCAAGGTGATGCT  
GAGTTCTGCAATGAAGTTGAGATCATTAGCAATTTGAAGCACCGGAATCTTGTCCCGCTT  
AGAGGCTGCTGTGTGATAGATGGGGATTGTGATGAAGGGAGCGCAAACAGAGGTATCTG  
GTGTACGAGCATATGCCCTATGGGAACCTCGAGGATCATCTCTCTTGTGCGAACCCACGC  
AGTGGAAATTTCAACAAGCAACCTCTGAGTTGGCCCCAAAGAAAGAGCATAATCTTGGAT  
TTGGCCAAAGGGATTGCCATCTTCACTATGGAGTGAACCTGCAATATATCATAGAGAC  
ATCAAGCCTACGAACATACTTTTGGATGCAGATATGAAAGCAAGAGTGGCAGACTTTGGG  
CTAGTCAAGCAAAGCAGAGAAGGACAGTCCCATCTCATCACCAGGTTGCTGGCACACAT  
GGCTACCTAGCTCCGGAGTATGCTCTCTATGGACAGTTAACT

>pac.W.ArA.14  
TATGCTGAGAACCcAAATCCTTGGTCGTGGAGGCTATGGTACTGTATACAAAGGAATTTTA  
GCAGACCACAGAATAGTGGCCGTAAAAAATCCAAAATAGTGGATGAGAACCcAAATTTGA  
CAATTCATTAATGAGGTTGTTATCTCTCCCAGATCAACCATAGGAATGTGGTAAGACTT  
CTAGGTTGTTGTTGGAGACTGAGGTTCCCTTTACTAATTTATGAGTTCATCAATAATGGT  
ACCCTATTCACCATATCCATGATGAGGGTCAATGTGTCATCAATTTCTTGGGAAATTCGT  
TTGAGGATAGCTGCAGAACTGCAGGAGCACTTGCCATCTTACTCCGAGTTTCTACA  
CCAATCATTCATAGGGATATTAAGTCTGCTAACATACTCTTAGATGAAAATTCACATCT  
AAAATAGCAGACTTTGGAGCTTCAAGGTGGTTCCTTTAGATCAGACTCAATTGACTACA  
TTAGTACAAGGGACGCTAGGTTACTTGGACCCAGAATACTTTTCATTCGAGTCAATTAACG

>pac.W.ArB.305  
GAATGGCTTCTCAGAGAAACAAAGGCTAGGAACTGGAGCCTATGGAACAGTTTTATGCAGG  
AAAGCTTCACAATGTGCACTGGGTTGCCATCAAAAAGATCAGACACCGAGACAATGATGG  
CATTGAGCAAGTCATGAATGAGATCAAGCTCCTTTTCATCGGTGAGCCACCCGAATCTAGT  
CCGCTCCTAGGCTGCTGTATAGAGAAGGGTGAACAGATCCTTGTGTATGAATTCATGCC  
AAATGGAACCTATCTCAGCATCTACAAAGGGAGATAAGCACTGGCCTCCCTTGGATGAC  
TCGACTCACCAATTGCCACCGAACTGCTCACGCTATTGCCATCTACTCTGCTATTAA  
CCCACCTATATTCCACAGAGACATCAAATCCAGCAACATCCTCTTAGACTATAACTACAA  
TTCGAAAGTCGCTGACTTTGGTCTATCTAGACTCGGTATGACTGAGTCGTCACATCTC  
CACAGCTCCACAAGGAACCTCCAGGGTATCTAGACCCTCAGTATCATCAGAACTTTCACCT  
TTCTGATAAAA

>pac.W.ArB.312  
GAATGGCTTCTCGGAGAAACAAAGGCTAGGAACTGGAGCCTATGGAACAGTTTTATGCAGG  
AAAGCTTCACAATGTGCACTGGGTTGCCATCAAAAAGATCAGACACCGAGACAATGATGG  
CATTGAGCAAGTCATGAATGAGATCAAGCTCCTTTTCATCGGTGAGTCACCCGAATCTAGT  
CCGCTCCTAGGCTGCTGTATAGAGAAGGGTGAACAGATCCTTGTGTATGAATTCATGCC  
AAATGGAACCTATCTCAGCATCTACAAAGGGAGATAAGCACTGGCCTCCCTTGGATGAC  
TCGCTCACCAATTGCCACCGAACTGCTCACGCTATTGCCATCTACTCTGCTATTAA  
CCCACCTATATTCCACAGAGACATCAAATCCAGCAACATCCTCTTAGACTATAACTACAA  
TTCGAAAGTCGCTGACTTTGGTCTATCTAGACTCGGTATGACTGAGTCGTCACATCTC  
CACAGCTCCACAAGGAACCTCCAGGGTATCTAGACCCTCAGTATCATCAGAACTTTCACCT  
TTCTGATAAAA

>pac.W.VtA.101  
TACAGTATACAAAGGTATGTTAGTAGACCGGAATGATTGTAGCAATTAAGAAGTCAAAAAT  
AGTGGACGAAGGCCAAATCGAGCAATTCATTTATGAGGTTGTCATGCTTTCCCAAATCAA  
CCACAGGAATGTGGTTAAATTTATAGGTTGTTGTTGGAGACAGAAGTTCCCTACTTGT  
TTATGAGTTTCATCTCAAAGGAACCTTTTCCACTATATCCATGACCAAAGTGAGGAGTT  
CCCAAATTTCTGGGACAATCGCTAAAAATTTGCTACAGATGTTGCAACTGCACCTTGCTTA  
CTTGCATTCAGCAGCTTCGATGCCAATCTACCACAGAGATATAAGTCGTCACATACT  
GTTGGATGACAAATATATAGCTAAAATATCAGACTTTGGGATTTCAAGATCCATCCCAAC  
AGATAAACTCACTTGACCACATTAGTTTCAGGGGACTTTGGGGTACTTGGATCCAGAATA  
TTACCAATCAAGCCAATTTACAGAGAAAA

>pac.W.VtA.102



TACAGTATACAAAGGTATGTTAGTAGATGGAACAATTGTAGCAATTAAGAAGTCAAAAAT  
AGTGGATGAAAGCCAGATGAGCAATTCATTAATGAGGTTGTCATGCTTTCCAGATCAA  
CCACAGGAATGTGGTTAAATTTATAGGTTGTTGTTGGAGGCAGAAGTTCCTCTACTTGT  
TTACGAGTTCATCTCCAATGGAACCCCTTTTCCATTATATTCATGACCAAAGTGAAAAGTT  
CCCAAATTCCTGGGACAATCGCTTAAAAATGCTACAGATGTTGCAGCTGCACTTGCCCTA  
CTTACATTCAGCAGCTTCGATACCAATCTACCATAGAGATATCAAGTCTTCCAACATACT  
CCTGGATGATAAATATATAGCTAAAATATCAGACTTTGGGGCTCAAGGTCCATCCCAAC  
AGATAAACTCACTTGACCACATTAGTTCAGGGGACTTTTGGGTACTTGGATCCAGAATA  
TTTCCAATCAAACCAATTTACAGAAATAA

>pac.W.VtA.105

TACAGTATACAAAGGTATGTTAGTAGACGGAATGATTGTAGCAATTAAGAAGTCAAAAAT  
AGTGGACGAAGGCCAAATCGAGCAATTCATTTATGAGGTTGTCATGCTTTCCCAAATCAA  
CCACAGGAATGTGGTTAAATTTATAGGTTGTTGTTGGAGACAGAAGTTCCTCTACTTGT  
TTATGAGTTCATCTCCAAGGAACCCCTTTTCCACTATATCCATGACCAAAGTGAGGAGTT  
CCCAAATTCCTGGGACAATCGCTTAAAAATGCTACAGATGTTGCAACTGCACTTGCTTA  
CTTGCATTCAGCAGCTTCGATGCCAATCTCCCACAGAGACATAAAGTCGTCCAACATACT  
CTTGGATGACAAATATATAGCTAAAATATCAGACTTTGGGATTCAAGATCCATCCCAAC  
AGATAAACTCACTTGACCACATTAGTTCAGGGGACTTTGGGGTACTTGGATCCAGAATA  
TTACCAATCAGGCCAATTTACAGAGAAAA

>pac.W.VtA.107

TACAGTATACAAAGGTATGCTCCATTGTGGAAGAATTGTAGCAATTAAGAAGGCTAAAT  
AGTTGATGAAGGCCAAGTCGAGCAATTCATTAATGAGGTTGTCATACTTTCCAGATCAA  
CCATAGAAATGTGGTTAAATTTAGGTTGTTGTTGGAGACAAAAGTTCCTTTACTAGT  
TTATGAGTTCATTTCCAATGGAACCTTTTTCTATCATATTCATGACCAAAGTGAGGAATT  
CCCAATTTTCATGGGTCAATTTGTTAAGAATTGCTACAGAAGTTGCTGGAGCACTTGCTTA  
CCTGCATTCGCTGCTTCTATACCAATCAATCATAGAGACATCAAGTCTACCAACATACT  
TCTAGATGAAAAGTATAACGCCAAAGTATCAGACTTTGGGATTCAAGGTCTGTTGCAAC  
TGATAAACTCATTTAACTACCACAGTGAAGGGACTTTTGGATACTTTGACCCAGAATA  
CTTTCAATCAAGCCAATTTACAGAGAAGA

>pac.W.VtA.108

TACAGTGTACAAAGGTATGTTGCAAGATGGAAGAAATGTAGCAACTAAGAAGTCCAGAAT  
AGTTGATGAAGGCCAAATCGAGCAATTCATCAACGAGGTTGTCATACTTTCCCAAATCAA  
CCATAGGAATGTGGTTAAATTTAGGTTGTTGTTGGAGACGGAAGTTCCTTTACTTGT  
TTATGAGTTCATTTCCAATGGAACCTTTTTCTATCATATTCATGACCAAAGTGAGGAATT  
CCCAATTTTCATGGGTCAATTTGTTAAGAATTGCTACAGAAGTTGCTGGAGCACTTGCTTA  
CTTGCATTCGCTGCTTCTATACCAATCTATCATAGAGACATCAAGTCTACCAACATACT  
TCTAGATGATAAAGTGAAGCCAAAGTTGCAGATTTTGAACCTCCAGGTCAGTCTCTGT  
TGACAAAACCTCATTTAACTACACTAGTGCAGGGGACCTTTGGGTACTTGGACCCAGAATA  
CTTCCAATCAAGCCAATTTACAGATAAGA

>pac.W.VtA.109

AACAGTATATAAAGGAATTTTAGAGGACCATAGAATAGTGGCTATTAAAAAATCCAAAT  
AGTGGATGAGAGCCAAATGAACAATTCATCAATGAGGTTGTTATTTCTCTCCAGATCAA  
CCATAGGAATGTGGTGAACCTCTAGGTTGTTGTTGGAGACTGAAGTACCTTTACTGAT  
TTATGAGTTTATCAACAACGGAACCCCTTTTCCACCATATCCATGATGAGGGTCATGTGTC  
ATCAATTTCTTGGGAAAGTCGTTTGAAGATAGCTGCAGAACTGCAGGAACACTTGCTTA  
TTTGCATTCGCAACTTCTATACCAATTTATACATAGGGATATTAAGTCTACTAACATACT  
CTTAGATGATAAATATACAGCTAAAGTAGCAGACTTTGGAGCTTCAAGGTTGGTTCCCTTT  
AGATCAAACCTCAATTGACTACATTAGTACAGGGGACATTAGGGTACTTGGACCCAGAATA  
CTTTATTTCAAGTCAATTAATAGAGAAGA

>pac.W.VtA.110

TACAGTATACAAAGGTATGCTACTAGATGGAAGAATTGTAGCAATTAAGAAATCCAAAAT  
AGTGAATGAGGGTCAAATCGAACAGTTCATTAATGAGGTTGTCATACTTTCTCATATCAA  
CCACAAGAACGTGGTTAAATTTGTTGGGTTGTTGTTGGAGACAGAAGTTCCTTTACTTGT  
TTATGAGTTCATCTCCAATGGAACCCCTTTTCCATCATATCCATGACCAAAGTGAGGAATT  
CCAATGTTTCATGGGACAATCGGTTAAGAATTGCTATAGAAGTTGCAAATGCACTTGCCCTA  
TTTGCATTCAGCAGCTTCCATACCAATTTATCATAGAGATATCAAGTCTACCAACATACT  
ATTAGATAGTAAATATACAGCTAAAGTATCAGACTTTGGGATTCAAGGTCCGTTCCAAA  
CGATAAACTCACTTAACCACATTAGTCCAAGGGACCTTTGGATACTTGGATCCAGAGTA  
TTTCCAATCAAGTCAATTTACAGAGAAAA

>pac.W.VtA.113

TACAGTATACAAAGGTATGTTAGTAGACGGAATGATTGTAGCAATTAAGAAGTCCAAAAT  
AGTGAATGAAGGGCAAATGAGCAGTTCATTAATGAGCTCGTCATTTCTCACATATCAA  
CCACAGGAACGTGGTTAAATTTGTTAGGTTGTTGTTGGAGACAGAAGTCCCTCTACTTGT  
TTATGAGTTTATCTCTAATGGAACCCCTTTTCCATCATATCCATGAAAAAAGTGAAAGATT  
CCTAAGTTTCATGGGATAATCGCTTAAAGAATTGCTATAGAAGTTGCAGGGCCTTGCTTA  
CTTGCATTCAGCAGCTTCCATACCAATTTATCATAGAGACATCAAGTCTACCAACGTA  
CATAGATGGTAAATATACAGCTAAAGTGTGAGACTTTGGTATTCAAGGTCTGTTCCAAT  
TGATAAAACCCCTCACCACATCAGTTCAGGGGACATTTGGTTACATGGATCCAGAGTA  
TTTCCAATCAAACCAATTTACAGAGAAAA

>pac.W.VtB.201

CATTATAATGATAATAGAATTCTTGGCCAAGGAGGCCAAGGTACAGTGTACAAAGGCATG  
CTTCAAGATGGAAGAATAGTAGCAGTTAAAAAGGCTACAATGGTTGATGAAGGCCAAGTT  
GAACAGTTCCATTAATGAGGTTGTCATTCTTTCTCAAATCAACCATAGGAATGTGGTTAAA  
TTGTTAGGTTGTTGTTTGGAAACAGAAGTTCCCTACTTGTATTATGAGTTCATCTTAAT  
GGAACCTTTTTTTACCACATTCATGACCCGACTGAAGAGTTTTGTTATGTCATGGGATAAT  
CGCTTAAGAATCGCTACAGAAGTTCAGGTGCACTTGCCTTACTTGCATTTCAGCAGCATCT  
ATTCCAATCTATCATAGAGATGTCAAGTCTACCAACATACTCTTAGATGATAAGCACAGA  
TCCAAGGTTTCAGACTTTGGAAGTCAAGATCAGTCTCAATCGACAAAACCTCATTTAACT  
ACAATCGTGCAAGGGACCTTAGGGTACTTGGACCCAGAATACTTCCAAAACAAGCCAATTC  
ACAGATAAGAGTGATGTTTATAGCTTTGGAGTTGTTCTTGTGGAGCTCCTAACAGGAGAG  
AAGCCAATTTCTTAATCAACTCCCAAGAAAAGGAGAAAACCTTAGTCACACATTTTATTCAA  
TTAACAAAAGAGAACCCTATCTTTGAGATTCTTGACGATCAAGTTGTTGAGGGTCGAAAA  
GAGGAGATTGAGGCAGTCGTTAACATTGCAAAGAGGTGCTTAAATTTTAAATGGAAAG

>pac.W.VtB.203

AATTATAATGAGAACAGAATTCTTGGCCAAGGAGGTCAAGGTACAGTATACAAAGGTATG  
CTCCATTGTGGAAGAATTGTAGCAATTA AAAAGGCTAAATTAGTTGATGAAGGCCAAGTC  
GAGCAATTCATTAATGAGGTTGTCATACTTTCCAGATCAACCATAGAAATGTGGTTAAA  
TTGTTAGGTTGTTGTTTGGAGACAGAAGTTCCCTACTAGTTTATGAGTTCATTTCCAAT  
GGAACACTTTTTTCACCACATCCATAGCCAAACTGAGGATTTCTTATGTCATGGGATAAT  
CGCTTAAGAATCATTACAGAAGTTCAGGTGCACTTGCCTTACTTGCATTTCATCAGTTTCG  
ATGCCAATCTATCATAGAGATGTCAAGTCCACCAATATACTCTTAGATGATAAGTATAGA  
GCAAAAAGTTTCAGACTTTGGAAGTTCAGGTGCACTTCCCTGTCGACAAAACCTCACTTAACT  
ACACTAGTGC AAGGGACCTAGGGTACTTGGATCCGGAATACCTTCAAACGAGCCAATTC  
ACAGATAAGAGTGATGTTTATAGCTTTGGAGTAGTCTTGTAGAGCTTCTAACGGGAGAG  
AAGCCAATATCTTTAATTGGCTCACAAGAAAAGAGAAAACCTAGTCACATATTTTATTCAA  
TCAACTAAGAAAACCGTCTCTTTGAGATTCTTGATGCTCAAATTTGTAGAGGGTCAAAA  
GAGGAGCTTGAGGTAGTTGCTGGCCTTGCAAAGAGGTGCGTGACCTTGAATGGAAAG

>pac.W.VtB.208

CATTATAATGAGAACAGAATTCTTGGCCAAGGAGGTCAAGGTACAGTATACAAAGGTATG  
CTCCATTGTGGAAGAATTGTAGCAATTA AAAAGGCTAAATTAGTTGATGAAGGCCAAGTC  
GAGCAATTCATTAATGAGGTTGTCATACTTTCCAGATCAACCATAGAAATGTGGTTAAA  
TTGTTAGGTTGTTGTTTGGAGACAGAAGTTCCCTACTAGTTTATGAGTTCATTTCCAAT  
GGAACACTTTTTTCACCACATCCATAGCCAAACTGAGGATTTCTTATGTCATGGGATAAT  
CGCTTAAGAATCATTACAGAAGTTCAGGTGCACTTGCCTTACTTGCATTTCATCCGCTTCC  
ATGCCAATCTACCATAGAGATATCAAGTCTACCAATATACTCTTAGATGATAAGTGTAAA  
GCCAAAGTTGCAGATTTTGAAGTTCAGGTGCACTTCTGTTGACAAAACCTCATTTAACT  
ACACTAGTGC AAGGGACCTTGGGTTACCTGGACCCAGAATACCTTCAAATCAAGCCAATTC  
ACAGATAAGAGTGATGTTTATAGCTTTGGAGTAGTCTTGTGGAGCTTCTAACAGGAGAG  
AAACCAATTTTCAGTCTTCCGACAAGAAAGGAGGAACCTAGTCACATATTTTATTTCAGTCA  
ATAAAAGAAAACCTTCTCTTTGAGATTCTTGATGATCGAATTA TAGAAGGCCGAAAGAG  
GAGATCGAGGAGTTGCTTCCCTTGCAAAGAGGTGCTTGAACCTTGAATGGAAAG

>pac.W.VtB.209

CACTTTAATGAGAACGAATTCTTGGTCAAGGAGGCCAAGGTACAGTGTACAAAGGCATG  
TTAGTAAATGGAAGAATTGTAGCAGTTAAGAGTCCAAAATAGTGAATGAAGGCCAAATC  
GAGCAGTTCATTAATGAGGTAGTCATACTTTCTCATATCAATCATAGGAATGTGGTTAAA  
TTATTAGGTTGTTGTTTGGAGACAGAAGTTCCCTACTTGTATTATGAGTTTGTCTCCAAT  
GGAACCTTTTTTCATCATATCCATGACCAAAGTGAAGGATTCCTAAGTTCATGGGATAAT  
CGCTTAAGAATGCTGCAGAAGTTCAGGTGCACTTGCATACTTGCATTCAACAGCTTCC  
ATACCAATCTATCATAGAGACATCAAGTCTACCAACATACTCTTGGATAGTAAATATACA  
GCTAAAAGTTTCAGACTTTGGGATTTCAAGATCCGTCCTCAAATGATAAAAACCTCACTTAAAC  
ACATTAGTTCAAGGGACCTTTGGGTTACTTGGATCCAGAGTATTTCAATCAAGCCAATTT  
ACAGAGAAGAGTGATGTTTATAGCTTTGGAGTAGTATTGTGGAGCTTTTAAACAGGTGAG  
AAGCCAATTTCTCTGTTAAATCAAAGAAAAGATGAATTTAGCCACACATTTTCTTTCT  
TCTATAAGGGAAAACCTGTCTATTTGAGATTCTTGATGCTCAAGTTGTCAAAGAGGATAGA  
AAAGAGGAGATTGAGATTGTTGCTAATCTTGCAAAGAGATGTTTGAACCTTGAATGGGAGG

>pac.W.Ch.152

CATGTTAGGAGATGGAAGAATTGTAGCAGTTAAGAAGTCCAAAATAGTGAATGAATGCCA  
AATTGAGCAATTCATTAATGAGGTTTTCATACTTTCTCATATCAATCACAGGAATGTTGT  
TAAATTGTTAGGTTGTTGTTTGGAAACAGAAGTTCCCTACTCGTTTATGAGTTTATCTC  
CAATGGAACCTCTTTTCATCATATTTCATGACCAAAGTGAAGGATTCCTAAGTTCATGGGA  
CAATCGGTTAAGAATTGCTGCAGAAGTTCAGGTACACTTGCCTACTTGCATTTCATCAGC  
TTCCATACCAATCTATCATAAAGACATTAAGTCTACAAACATACTCTTAGATGGTAAATA  
TACAGCTAAAGTGCAGACTTTGGGACCTCAAGATCAATCCCAAACGATAAAAACCTCACTT  
AACCACATTAGTTCAAGGGACCTTCGGTACTTGGATCCGGAGTATTTTCAATCAAGCCA  
ATTCACAGAGAAGAGTGATGTTT

>pac.W.Ch.156

AATTTTAGAGGACCATAGAATAGTGGCTGTTAAAAATCCAAATTAGTGGATGCGAGCCA  
AATTGAACAATTCATAAATGAGGTTGTTATTTCTCTCCAGATCAACCATAGGAATGTGGT  
GAGGCTTCTAGGCTGTTGTTTGGAGACTGAAGTACCTTTACTAATTTATGAGTTCATCAG  
CAACGGAACCTCTTCCACCATATCCATGACGAGGGTCATGTGTCCTCAATTTTCATGGGA

AATTTCGTTTTGAGGATAGCTACTGAAACTGCAGGAACACTTGCTTATTTGCATTCTGCAAC  
TTCTACACCAATFATTAATAGGGATATTAAGTCTACTAACATACTCTTAGACGATAATTA  
CACAGCTAAAGTAGCAGACTTTGGAGCTTCAAGGTTAGTTCCTTTAGATCAAACCTCAATT  
GACTACGTTAGTACAAGGGACATTTGGGGTACTTGGACCCAGAATACTTTCTTTCAAGTCA  
ATTAACAGAGAAGAGTGATGTTT

>pac.W.Ch.157

TATGTTAGTAGATGGAACAATTGTAGCAATTAAGAAGTCAAAAATAGTGGATGAAAGCCA  
GATTGAGCAATTCATTAATGAGGTTGTCATGCTTTCCAGATCAACCACAGGAATGTGGT  
TAAATTATTAGGTTGTTGTTTGGAGGCAGAAGTTCCTCTACTTGTTTACGAGTTCATCTC  
CAATGGAACCCCTTTCCATTATATTCATGACCAAAGTGAAGTTCCTCAAAATCTTGGGA  
CAATCGCTTAAAAATGCTACAGATGTTGCAGCTGCACTTGCCCTACTTACATTACAGCAGC  
TTCGATACCAATCTACCATAGAGATATCAAGTCTTCCAACATACTCTGGATGATAAATA  
TATAGCTAAAATATCAGACTTTGGGGCTTCAAGGTCATCCCAACAGATAAAAACCTACTT  
GACCACATTAGTTCAGGGGACTTTTGGGTACTTGGATCCAGAAATTTTCCAATCAAGCCA  
ATTTACAGAAAAAAGTGATGTTT

>pac.W.Ch.158

TATGCTACTAGATGGAAGAATTGTAGCAATTAAGAAATCCAAAATAGTGAATGAGGGTCA  
AATCGAACAGTTCATTAATGAGGTTGTCATACTTTCTCATATCAACCACAAGAAGTGGT  
TAAATTGTTGGGTTGTTGTTTGGAGACAGAAGTTCCTTTACTTGTTTATGAGTTCATCTC  
CAATGGAACCCCTTTCCATCACATCCATGACCAAAGTGAAGTTCCTCAATGTTTATGGGA  
CAATCGGTTAAGAATTGCTATAGAAGTTCGAAATGCACTTGCCATTTGCATTACAGCAGC  
TTCCATACCAATCTATCATAGAGATATCAAGTCTACCAACATACTATTAGATAGTAAATA  
TACAGCTAAAGTATCAGACTTTGGGATTTCAAGGTCCTGTTCCAAACGATAAAAACCTACTT  
AACCACATTAGTCCAAGGGACCTTTGGATACTTGGATCCAGAGTATTTCCAATCAAGCCA  
ATTTACAGAAAAAAGTG

>pac.W.Ch.160

TATGCTACTAGATGGAAGAATTGTAGCAATTAAGAAATCCAAAATAGTGAATGAGGGTCA  
AATCGAACAGTTCATTAATGAGGTTGTCATACTTTCTCATATCAACCACAAGAAGTGGT  
TAAATTGTTGGGTTGTTGTTTGGAGACAGAAGTTCCTTTACTTGTTTATGAGTTCATCTC  
CAATGGAACCCCTTTCCATCACATCCATGACCAAAGTGAAGTTCCTCAATGTTTATGGGA  
CAATCGGTTAAGAATTGCTATAGAAGTTCGAAATGCACTTGCCATTTGCATTACAGCAGC  
TTCCATACCAATCTATCATAGAGATATCAAGTCTACCAACATACTATTAGATAGTAAATA  
TACAGCTAAAGTATCAGACTTTGGGATTTCAAGGTCCTGTTCCAAACGATAAAAACCTACTT  
AACCACATTAGTCCAAGGGACCTTTGGATACTTGGATCCAGAGTATTTCCAATCAAGTCA  
ATTCACAGAAAAAAGTGATGTTT

>pac.W.Ch.162

AGTGTTGTCAGATGGAAGAATAATAGCCGTCAGAAGTCCAAGGATGCTAATCTAATTCG  
TCTATTTCGTAATGAGGCTATCATTTCTCTCCAAGATTAATCACACAAACGTTGTTAAACT  
GATAGGCTATTGCAAAGAACTGAAGTTCCTTTATTAGTTTACGAATTTGTTATAAATGG  
AACCCTAGCCACCATCTCCATGAATTGGGCTTAGGTCATCGTTGGGTTGGGGAGACCG  
CTTAAAGATTGCTGCAGAAGTTCGAAATGCAATTGCCTGTATGCATTTCTGTAAATCAT  
ACATAGAGACATAAAATCTACCAACATACTGTTGGATGAAAATTTACGGCCAAATTTGTG  
TGACTTTGGACTTTCAAGGACAGTCCCATCTGATCAAGATCACGTATCAACCAAGGAGTT  
GTGGGGGACGGAGGGGTACGTGGACCCTGACTATATTACAGACGGCCAACTCACTGGTAA  
GAGTGATGTTT

>pac.W.Ch.164

AATTTTAGCAGACCACAGAATAGTGGCTGTTAAAAAATCCAAAATAGTGGATGAGAGCCA  
AATTGAACAATTCATAAATGAAGTGTATTCTCTCTCAGATCAACCATAGGAATGTGGT  
GAGACTTCTAGGATGTTGTTTGGAGACTGAGGTTCTCTACTAATTTATGAGTTTATCAA  
CAATGGAACCCCTTTGCACCATATCCATGATGAGAGTCATATATCCTCAATTTCTTGGGG  
ATGTCGTTTTGAGGATAGCTACAGAAACTGCGGAAGCACTTGCTTATCTACATTTCTGCAGC  
TTCTCCACCAATCATTACAGGGATATTAAGTCTACTAACATACTCTTGGATGAAGATTA  
CACGGCTAAAATAGCAGACTTTGGAGCTTCAAGGTTGGTTCCTCTTGATTACACACAATT  
GACTACATTAGTACAAGGGACGTTGGGGTACTTGGACCCAGAATAATTTTCATTCAAGTCA  
ATTAACTGAGAAAAAGTGATGTTT

>pac.BRI.L.2

TGAAGCCaCCAATGGCTTCCACAACGACAGCCTGGTTGGCTCTGGTGGCTTTGGGGATGT  
GTACAAAGCCCAATGAAGGATGGAAGCACTGTGGCAATCAAAAAACTAATCCATGTTAG  
TGGACAAGGTGACCGGAATTCACAGCAGAAATGGAGACCATTGGGAAGATTAAGCACCG  
GAACCTTGTCCCTTATTGGGCTACTGCAAGGTTGGGGAAGAACGGCTCTTGGTGTATGA  
ATACATGAGGTTCCGGTAGCTTAGAAGACATCTACATGATAGGAGAAAAGCAGGGATCAA  
GCTGAATTTGGGTTGCAAGGAGGAAAAATCGCCATTTGGCGCAGCGAGAGGATTAGCATTCCT  
CCACCACAATTCATCCCTCATATCATTACAGGGACATGAAGTCAAGCAACGTCCTGCT  
CGATGAGAACTTTGGAAGCTCGGGTGTGAGATTTTGAATGGCAAGGTTGATGAGTGAAT  
GGACACCCACCTGAGTGTGACGACACTCGCCGGCACACCGGGTTATGTCCCACCGGAATA  
CTACCAGAGCTTCCGGTGTCTACCAAGGGTGTGCTTACAGCTATGGGGTAGTCTTCT  
CGAGCTGCTAACCGGCAAGCAGCCACGGACTCGGCAGATTTTGGTGACAACAACCTAGT  
GGGATGGGTGAAGCAGCATGCAAGGCTGAGAATAACTGATGTGTTGATCCTGAGCTCAT  
GAAAGAGGAGCCAACTTGGAAATGGAGCTACTAGAACACCTGAAGATTGCATGTGCTG  
TTTGGATGATCGATCGTGGCTGACCCACCATGATTCAAGTAAT

>pac.BRI.L.6

GGAAGCTTACGTTTCGGCGGATCTTCTTGAAGCCaCCAATGGCTTCCACAATGACAGCCTCA  
TCGGCTCCGGTGGGTTTGGGGATGTGTACAAAGCTCAACTAAAGGATGGAAGCATTGTAG  
CCATCAAGAAATTAATCCATGTAAGTGGACAAGGTGACAGGGAATTCACAGCTGAAATGG  
AAACCATTGGTAAGATTAAGCACAGGAACCTTGTCCCCCTCTTGGGCTACTGCAAGGTAA  
GGGAAGAACGGCTGTTGGTTTATGAGTACATGAGATTTGGAAGCTTAGATGACATTTTAC  
ATGATAAAAAGAAAAGCTGGGATCAAACCTGAATTGGGCAGCCAGGAGGAAAATTTGCTATTG  
GTGCTGCGAGGGGATTAGCTTTCCTCCACCACAACCTGCACCCCCATATAAATTCACAGAG  
ACATGAAGTCCAGCAATGTCTGCTTGATGGTAACTTGAAGCTCGGGTGTCTGATTTTCG  
GAATGGCGAGGCTGATGAGCGCAATGGACACCCACCTGAGTGTGACACACTTGCCGGTA  
CCCCAGGTTACGTTCCACCAGGAACTACTACCAGAGCTTCCGGTGTCTACTAAAGGGGACG  
TTTACAGCTACGGGTTAGTCTGCTAGAGCTGCTAACCGGTAAGCTGCCAACAGACTCGA  
CTGACTTTGGTGACAACAACCTAGTGGGATGGGTGAAGCAGCACGCAAAGCTCAAAATAA  
GCGATGTGTTGACCCCTGAGATCATGAAAGAGGACCCAAGCTTGAGAGGTGGAACCTTAC  
AGCACTTAAAGATCGCCTGTGCGTGCTTGAGCGAACGACCGAGTGCAGCACCCTCGATGA  
TACAAGTAATGGCGATGTTTAAAGGAAATTC AAGCAG

>pac.BRL.B.8

TGCTGACAGCTTGATAGGATCTGGTGGGTTCCGGTGAGGTCTACAAGGCCAGCTAAAGGA  
CGGATGTGTGGTGGCAATTAAGAAGCTGATTCATGTACAGGTCAGGGGACAGAGAATT  
TACTGCAGAAATGGAACAATAGGGAAGGTCAAGCACAGAAACCTTGTTCATTGTTGGG  
TTACTGCAAAATAGGAGAGGAGAGACTTCTTGTGTACGAGTACATGAAATGGGGAAGCTT  
GGAGACAGTTCTTCATGACAGGACCAACGGAGGGGGCTCGAAGCTCAACTGGGCAGCAAG  
AAAGAAGATTGCTACTGGTTCGGCAAGAGGACTTGCATTTCTTACCATAATTGCATTCC  
TCACATAATCCACAGGGACATGAAGTCTAGCAATGTTCTCCTTGATGAAAATTTGGAGGC  
CCGGGTGTCAGATTTTGGCATGGCAAGGCTGATGAATGCCGTTGACACACACCTCAGCGT  
AAGCACCCCTCGCTGGGACACCGGTTATGTTCCACCTGAATACTACCAGAGTTTCAGGTG  
CACGACAAAAGGGGATGTGTACAGCTACGGTGTACTACTGCTAGAGCTTGTCTCAGGCAA  
GAGACCGATTGACCCATCAGAATTTGGT

>pac.BRL.B.9

TGCTGACAGCTTGATAGGATCTGGTGGATTCCGGTGAGGTCTACAAGGCCAGCTGAAGGA  
TGGGTGTGTTGTTGCAATCAAGAGGCTGATTCATGTACAGGTCAGGGGGACAGAGAATT  
TACTGCAGAAATGGAACAATCGGGAAGATCAAAACACAGAAACCTTGTTCATTGTTGGG  
TTACTGCAAGATTGGAGAGGAGAGGCTTCTTGTGTACGAGTACATGAAATGGGGAAGCTT  
GGAGACAGTTCTTCATGACAGGGCCAAGGGAAGGGGCTCGAAGCTCGACTGGGCAGCAAG  
AAAGAAAATTTGCTGTTGGGTTCGGCAAGAGGACTTGCATTTCTTACCATAGCTGCATTCC  
TCACATAATCCACAGGGACATGAAGTTCGAGCAATGTTCTCCTAGATGAAAATTTAGAGGC  
CCGGGTGCTGATTTTGGCATGGCAGGCTAATGAATGCCCTTGACACTCATCTCAGCGT  
AAGCACCCCTAGCAGGGACACCGGTTATGTTCCACCTGAATACTACCAGAGTTTCGGGTG  
CACAACAAAAGGGGACGTGTACAGTTACGGGGTCATACTGCTGGAGCTACTCTCAGGTAA  
GAGACCAATTGACCCATCAGAATTTGGT

>pac.BRL.B.12

TGCTGACAGCTTGATAGGATCTGGTGGGTTCCGGTGAGGTCTACAAGGCCAGCTGAAGGA  
CGGATGTGTGGTGGCAATTAAGAAGCTGATTCATGTACAGGTCAGGGGGACAGAGAATT  
TACTGCAGAAATGGAACAATAGGGAAGATCAAGCACAGAAACCTTGTTCATTGTTGGG  
TTACTGCAAAATAGGAGAGGAGAGACTTCTTGTGTACGAGTACATGAAATGGGGAAGCTT  
GGAGACAGTTCTTCATGACAGGGCCAAGGGAAGGGGCTCGAAGCTCGACTGGGCAGCAAG  
AAAGAAAATTTGCTGTTGGGTTCGGCAAGAGGACTTGCATTTCTTACCATAGCTGCATTCC  
TCACATAATCCACAGGGACATGAAGTTCGAGCAATGTTCTCCTAGATGAAAATTTAGAGGC  
CCGGGTGCTGATTTTGGCATGGCAGGCTAATGAATGCCCTTGACACTCATCTCAGCGT  
AAGCACCCCTAGCAGGGACACCGGTTATGTTCCACCTGAATACTACCAGAGTTTCAGGTG  
CACAACAAAAGGGGACGTGTACAGTTACGGGGTCATACTGCTGGAGCTACTCTCAGGTAA  
GAGACCAATTGACCCATCAGAATTTGGT

>pac.BRL.B.14

TGCTGACAGCTTGATAGGATCTGGTGGGTTCCGGTGAGGTCTACAAGGCCAGCTGAAGGA  
CGGATGTGTGGTGGCAATTAAGAAGCTGATTCATGTACAGGTCAGGGGGACAGAGAATT  
TACTGCAGAAATGGAACAATAGGGAAGATCAAGCACAGAAACCTTGTTCATTGTTGGG  
TTACTGCAAGGTTGGAGAGGAGAGGCTTCTTGTGTACGAGTACATGAAATGGGGAAGCTT  
GGAGACAGTTCTTCATGACAGGGCCAAGGGAAGGGGCTCGAAGCTCGACTGGGCAGCAAG  
AAAGAAAATTTGCTGTTGGGTTCGGCAAGAGGACTTGCATTTCTTACCATAGCTGCATTCC  
TCACATAATCCACAGGGACATGAAGTTCGAGCAATGTTCTCCTAGATGAAAATTTAGGGGC  
CCGGGTGCTGATTTTGGCATGGCAGGCTAATGAATGCCCTTGACACTCATCTCAGCGT  
AAGCACCCCTAGCAGGGACACCGGTTATGTTCCACCTGAATACTACCAGAGTTTCAGGTG  
CACAACAAAAGGGGACGTGTACAGTTACGGGGTCATACTGCTGGAGCTACTCTCAGGTAA  
GAGACCAATTGACCCATCAGAATTTGGT

>pac.BRL2.102

AGCAAGCATGATTGGGTGCGGTGGGTTTGGAGAAGTGTTC AAGGCCACATTA AAAAGACGG  
CTCAAGTGTCCGATTAAGAAGCTCATACGCTGAGTTGCCAGGGCGATCGAGAATTCAT  
GGCCGAGATGGAACCTCTAGGGAAAATCAAGCACAGGAATCTTGTTCCTCTACTGGGCTA  
TTGCAAGATTGGGGAGGAGAGGCTCCTCGTCTACGAATTCATGGAGTTTGAAGTCTCGA  
AGAGATGCTCCATGGGAGAACAAGGGCTCGGGAAGGAAGGCGGATACTAACATGGGAGGA

ACGGAAGAAGATTGCAAGAGGGGCAGCAAAAAGGGCTCTGTTTCCTGCACCACAATTGCAT  
CCCACACATCATACACCGTGACATGAAGTCAAGCAACGTGCTTTTGGACCATGATATGGA  
AGCAAGAGTGTCCAGACTTTGGGATGGCAAGGCTCATAAGTGCCCTGGACACGCACCTCAG  
CGTGAGCACACTCGCAGGCACACCTGGGTATGTCCCACCTGAATACTACCAGAGCTTCCG  
CTGCACTGCCAAGGGAGATGTTTACTCATTCCGAGTCTGACTCTTGGAGCTCTTGACGGG  
AAAGAGGCCCTACGGACAAGGAGGATTTTGGAGATAACCAATTTGGTTGGGTGGGTGAAGAT  
GACGGTGAGGGAAGGGAGGGGAAGGAAGTAATCGACCCGGAGCTGCTTTCCGGCCATCAA  
GGGCGGTGATGAAGATGAAGCTGAAGAGTTCAAGGAGATGGTGAAGATACTTGGAGATAAC  
GATGCAGTGCCTGGAAGATTTTCCTTCTAGGAGGCCAAACATGTTGCAGGTG

>pac.BRL2.108

AGCAAGCATGATTGGGTGCGGTGGGTTTGGAGAAGTGTCCAAGGCCACATTAAGACGG  
CTCAAGTGTCCGATTAAGAAGCTCATACGCCCTGAGTTGCCAGGGCGATCGAGAATTCAT  
GGCCGAGATGGAACTCTAGGAAAATCAAGCACAGGAATCTTGTTCCTCTACTGGGCTA  
TTGCAAGATTGGGGAGGAGAGGCTCCTCGTCTACGAATTCATGGAGTTTGGAACTCTCGA  
AGAGATGCTCCATGGGAGAACAAGGGCTCGGGGAAGGAAGGCGGATACTAACATGGGAGGA  
ACGGAAGAAGATTGCAAGAGGGGCAGCAAAAAGGGCTCTGTTTCCTGCACCACAATTGCAT  
CCCACACATCATACACCGTGACATGAAGTCAAGCAACGTGCTTTTGGACCATGATATGGA  
AGCAAGAGTGTCCAGACTTTGGGATGGCAAGACTCATAAGTGCCCTGGACACGCACCTCAG  
CGTGAGCACACTCGCAGGCACACCTGGGTATGTCCCACCTGAATACTACCAGAGCTTCCG  
CTGCACTGCCAAGGGAGATGTTTACTCATTCCGAGTCTGACTCTTGGAGCTCTTGACGGG  
AAAGAGGCCCTACGGACAAGGAGGATTTTGGAGATAACCAATTTGGTTGGGTGGGTGAAGAT  
GACGGTGAGGGAAGGGAGGGGAAGGAAGTAATCGACCCGGAGCTGCTTTCCGGCCATCAA  
GGGCGGTGATGAAGATGAAGCTGAAGAGTTCAAGGAGATGGTGAAGATACTTGGAGATAAC  
GATGCAGTGCCTGGAAGATTTTCCTTCTAGGAGGCCAAACATGTTGCAGGTG

## aa sequences

>pac.x.5.1

GVLSDRITIGAIKVFNLEFLAAFKSFDAECEVMRNICHRNLVKIISSCSNTEFRALILEYM  
PNSLEKWLVSNNYLDLDFMQRLDIMLDVASALEYLHHDYSTAVVHCDLKPSNVLLDEDMV  
GHVCDFGIAKLLPENESTKQTKTLGTL

>pac.x.5.2

GILHQDKLPVAVKVLNLQERGASKSFMAECEILREIRHRNLLKILASCSTIDFQGNDFKA  
LVFELMPNGLERWLHPSTDGQHLNLYLCLGKRLDIAIDIASALDYLHHHNQTPIVHCDL  
KPSNILLDDSMMAAHMGDFGLAKFLSKDTNFSKNETSSIAIKGSI

>pac.x.5.3

GILPRDELPVAVKVLNLQECGASKSFMAECEALRAIRHRNLLKILTSCSGVDFEGNDFKA  
LVFELMHNGSLENWLHPTIDGRHLLNLRFGQRLNIAIDVASALDYLHHHCQTPIVHRDI  
KPSNVLLDDMTAHVGDGFLAKFLSNPTNNSRKFESSSVALRGS I

>pac.x.5.4

GLLNQGETIVAVKVLNLQYGSYKSFMAECESLRNIQHRNLVKVITSCSSIDFEGNDFKA  
LVYEFMSNGSLERWLHPNAEDAQVEQRNLNLLQRLNIAIDVACALDYLHHNSKTPIVHCD  
LKPSNVLLDDDMVAHVGDGFLSRFLPMTINNSRSRQTSSMGI

>pac.x.5.6

GMVHQDGRIVSVAVKVLNLQQEASKTFMAECKALRNVHRNLLKIITSCSSADFKGNEF  
KALVLEFMPNGLSLESWLHPRIDGQLQLRYSISQRLNIAIDVALALDYLHHHCQPIAHCD  
DLKPSNVLLDDMTAHVGDGFLAKFLYRASNNCGEGQHSSAALKGTI

>pac.x.5.8

GILCQDEPPVAVKVLNLQEQGASKSFMAECEALREIRHRNLLKILTCCSSVDFEGIDFKA  
LVYELMPNGLSLENWLHQSTNGQHLNLDLNFQRLNIAMDVALALDYLHHHCQTPIVHCDL  
PSNVLLDDDMVAHLGDFGLAKFLSMTSNYSSENETISIVIKGSI

>pac.x.5.9

GILPRDELPVAVKVLNLQYEGASKSFMAECEALRAIRHRNLLKILTSCSGVDFEGNDFKA  
LVFELMHNGSLENWLHPTIDGQHLNLRFGQRLNIAIDVASALDYLHHHCQTPIVHRDL  
KPSNVLLDDMTAHVGDGFLAKFLSNPTNNSRKFESSSVALRGS I

>pac.x.5.12

GILRQDEQPIAVKVVNLQEQGASKSFMAECEALREIRHRNLLKILTSCSSVDFQGNDFKA  
LVFELMPNGLSLENWLHPKPNQNLNLRQRLNISIDVASALDYLHHHCQTPIVHCDL  
KPSNVLLDDMTAHVGDGFLAKFLSNPTNNSRKFESSSVALRGS I

>pac.x.5.13

GNLPRDDLPAVKVLNLQECGASKSFMAECEALRAIRHRNLVKILTSCSSVDFEGNDFKA  
LVFELMHNGSLENWLHPTLDGRHLLNLRFGQRLNIAIDVASALDYLHHHCQTPIVHCDL  
KPSNVLLDDMTAHVGDGFLAKFLFNPTNNSRKNESSSVALRGS I

>pac.x.5.14

GLLNQGETNVAVKVFNLPHGASKSFMAECESLRNIRHRNLVKVITSCSSIDFAGNDFKA  
LVYEFMSNGSLERWLYPNAEVAQVEQRNLNLLQRLNIAIDVASALDYLHHNCQTPIHCD  
LKPSNILLDDDMVAHVGDGFLSRFLPMTINNSQSQTSSIGIKGSI

>pac.x.5.17

GILHQNELPIAVKVFNLLEHGASKSFMTECEALREIRHRNLLKILTSCSSTDFEGNDFKA  
LVFVLMPNGSLENWLHQSTYGRHQNYLNFQRLNIAIDVASALDYLHHQCQTPIVHSDLK  
PSNVLLDDDMVAHVSDFLAKFISKPTKYSGNKTSVVIKGS I  
>pac.x.5.18  
GILPRDDLPAVKVNLNQEKGASKSFMACEALRAIRHRNLVKILTSCSSVDFEGNDFKA  
LVFELMHNGSLENWLHPTLDGQHLLNLRFGQRLNIAIDVASALDYLHHHCQTLIVHCDL  
KPSNVLLDDDMTAHVGDGFLAKFISKPTNYFGKNDTSSSIAIKGS I  
>pac.x.5.19  
GILPRDDLPAVKVNLNQEKGASKSFMACEALRAIRHRNLVKILTSCSSVDFEGNDFKA  
LVFELMHNGSLENWLHPTLDGQHLLNLRFGQRLNIALDVASALDYLYHCQTPIVHCDL  
KPSNVLLDDDMTAHVGDGFLAKILSKPTS YTGKNETSSLAIKGS I  
>pac.x.5.26  
GLLNQGETNVAVKVFNLPQHGASKSFMACEALRNIRHRNLVKVITSCSSIDFAGNDFKA  
LVYEFMSNGSLERWLYPNAEVAQVEQRNLNQLRNLNIAIDVASALDYLHHNCKTPIIHCD  
LKPSNILLDDDMVAHVGDGFLSRFLPMTINNSRSRQTSSIGIKGS I  
>pac.x.5.39  
ASLGGEKRILAIKKLVTSNIIQYPEDFDREVRILGKAMHPNMLTKGYYWTPQLQLLISD  
YAPNGSLHSLHERSPSTPSLSWANRFKIVLGTAKGLAHLHQSFRRPPIIHYNVKPSNILL  
DENYNPKISDFGLARLLPKLDKXVINSRFSAL  
>pac.x.5.43  
ASLGGEKRILAIKKLVTSNIIQYPEDFDREVRILGKAMHPNMLTKGYYWTPQLQLLISD  
YAPNGSLHSLHERSPSAPLSWANRFKIVLGTAKGLAHLHQSFRRPPIIHYNVKPSNILL  
DENYNPKISDFGLARLLPKLDKXVINSRFSAL  
>pac.x.6.102  
YKGILHQDKLPVAVKVLNLEQERGASKSFMACEILREIRHRNLLKILASCSTIDFQGNDF  
KALVFELMPNGSLERWLHPSTDGQHLLNYLCLGKRLDMAIDIASALDYLHHHNQTPIVHC  
DLKPSNILLDDDMTAHMGDFGLAKFLSKDTNFSKNETSSIAIKGS I  
>pac.x.6.103  
YKGILHRDESPVAVKVFNLLEHGASKSFMTECEALREIRHRNLLKILTSCSSTDFEGNDF  
KALVFVLPNGSLENWLHQSTYGRHQNYLNFQRLNIAIDVASALDYLHHQCQTPIVHSD  
LKPSNVLLDDGMVAHVSDFLAKFISKPTKYSGNKTSVVIKGS I  
>pac.x.6.104  
YKGMVHQDGRILVSVAVKVLNQQQEASKTFMAECKALRNVRHRNLLKIITSCSSADFKGN  
EFKALVLEFMPNGSLESWLHPRIDGQLQLRYLSISQRLNIAIDVALALDYLHHHCQIPIA  
HCDLKPSNVLLDDDMTAHVGDGFLAKFLSRATSNSSGEGQHSSVAIKGTI  
>pac.x.6.107  
YKGIHYDGGKPAVKVNLNQQRGASKTFMVECNALRKIRHRNLLKIITSCSSVDFKGN  
DFKALVFEYMPNGSLESWLHPSIDEKHQSRYLNFQRLDIAIDAAFALDYLNHCPTPIV  
HCDIKPSNVLLDDDMTAHVGDGFLAKTLRSASNNCGEGQHSSAALKGTI  
>pac.x.6.108  
YKGIHQDEQVAVKVLNLEQERGASKSFMACEALREIQHRNLLKIITSCSTVDFEGNFF  
RAFVFEFLPNGSLENWLHPSTDGQHLLKNLSFSQRLNIAIDVAFTLDYLHHHCQTPIVHC  
DLKPSNILLDDDMTTHVGDGFLAKFLSKPTNYSRDETSSVAIKGS I  
>pac.x.6.109  
YKGIHQDGRAILIAVKVNLNLLQRKASKTFMAECKALRNIRHRNLLKILTSCSSIDFKGN  
DFKALVFEFMPNRSLESWLHPSVNEHHQLRCLNFSQRLNVAIDVAFALDYLNHCPTPIV  
HCDLKPSNVLFDDDMTAHVGDGFLAKFLSMATDNSGESQYSSIAIKGTI  
>pac.x.6.112  
YKGMVHQDGRILVSVAVKVLNQQQEASKTFMAECKALRNVRHRNLLKIITSCSSADFKGN  
EFKALVLEFMPNGSLESWLHPRIDGQLQLRYLSISQRLNIAIDVALALDYLHHHCQIPIA  
HCDLKPSNVLLDDDMTAHVGDGFLAKFLYRATSNESAEGQNSLATIKGTI  
>pac.x.6.115  
YKGILHQDGRSILVAVKVLNQQRDGFKSFMTECKALRNIRHRNLVKILTSCSSIDFKDN  
DFKALVFEFMPNGSLESWLHPSTEGHHQSRYLNFQRLNIAIDVAFALDYLNHCSTPIV  
HCDLKPSNVLLDDDMTAHVGDGFLAKILSRATSNSSGEGQHSSAALKGTI  
>pac.x.6.123  
YKGILHQDELFAVKVFNLQEWGASKSFMACEALREIRHQNLKILTACSSIDIEGNDL  
KALVSKLMPNGSLENWLHPNTYGGHLLNLSFGKRLNIAIDVASALDYLHHHCQTPIVHR  
DLKPSNVLLDDDMIAHVGDGFLAKFLSKLDNYSKNETSSIAIKGS I  
>pac.x.6.124  
YKGILHQDKLPVAVKVLNLEQERGASKSFMACEILREIRHRNLLKILASCSTIDFQGNDF  
KALVFELMPNGSLERWLHPSTDGQHLLNYLCLGKRLDIAIDIASALDYLHHHNQTPIVHC  
DLKPSNILLDDSMTAHMGDFGLAKFLSKDTNFSKNETSSIAIKGS I  
>pac.x.6.129  
YKGIHQDGRAILIAVKVNLNLLQRKASKTFMAECKALRNIRHRNLLKILTSCSSIDFKGN  
DFKALVFEFMPNGSLESWLHPSVNEHHQLRCLNFSQRLNVAIDVAFALDYLNHCPTPIV  
HCDLKPSNVLFDDDMTAHVGDGFLAKFLSMATDNSGESQYSSIAIKGTI  
>pac.x.7.4  
GLLSDGTVSAVKVFENSEFQGVFKSFNVECEVYRNIRHRNLKIITSCSNIEFRALILEYM  
PNSLEKWLYSQNYCLNVLQRLDIMIDVAFALDYLHHGYSTLVVHCDLKPTNILLDEDMV

GHVGDGFIKLAFAENASIVQTETLGTLL  
>pac.x6.52  
KGTLSNNTTEVAVKCVSHDSEQGLREFMAEISSMGRLOHKNLVHMKGWCRKGNELMLVYNY  
MSNGSLNRWIFDEPKKLLGWKERRRVLVDVAEGLNYLHHGWDQVVLHRDIKSSNILLDSE  
FRRLGDFGLAKLYQHKGKEPGTTRLVGTGLGYLAPELVNVGATAA  
>pac.x6.53  
KGTLSNNTTEVAVKCVSHDSEQGLREFMAEISSMGRLOHKNLVHMKGWCRKGNELMLVYNY  
MSNGSLNRWIFDEPKKLLGWKERRRVLVDVAEGLNYLHHGWDQVVLHRDIKSSNILLDSE  
FRRLGGFGLAKLYQHKGKEPGTTRLVGTGLGYLAPELVNVGATAA  
>pac.x6.54  
KGTLSNNTTEVAVKCVSHDSEQGLREFMAEISSMGRLOHKNLVHMKGWCRKGNELMLVYDY  
MSNGSLNRWIFDEPKKLLGWKERRRVLVDVAEGLNYLHHGWDQVVLHRDIKSSNILLDSE  
FRRLGDFGLAKLYQHKGKEPGTTRLVGTGLGYLAPELVNVGATAA  
>pac.x6.55  
KGTLSNNTTEVAVKCVSHDSEQGLREFMAEISSMGRLOHKNLVHMKGWCRKGNELMLVYDY  
MSNGSLNRWIFDEPKKLLGWKERRRVLVDVAEGLNYLHHGWDQVVLHRDIKSSNILLDSE  
FRRLGDFGLAKLYQHKGKEPGTTRLVGTGLGYLAPELVNVGATAA  
>pac.pt.4.7  
VLKNKMTVAVKRSDPGGDQGLLEFQREIIILSSIRHRHLVSLIGYCDERSEMILVYEFME  
KGTLRSHLYNSDPLPSLWKQRLEICIGSARGLHLYLHTGVAGGIHRDIKSTNILLDENYV  
AKVADFGLSREVPVEHSRGGYVSTAVKGTFGYLDPEYFRQQQLTEKS  
>pac.pt.4.8  
VLRDNTKIAVKRCVPGSKQGLPEFQTEITVLSKIRHRHLVALVGYCEEQSEMILVYEFME  
KGPLRNHLYGSELPLPSLWKQRLEICIGSARGLHLYLHTGSAQGIHRDVKSTNILLDETYV  
AKVADFGLSRSGPCMDETHVSTGVKGSFGYLDPEYFRQQQLTDKS  
>pac.pt.4.11  
TLEDGTKVAVKRGNPRSEQGLAEFRTEIEMLSKLRHRHLVSLIGYCDERSEMILVYEFMA  
NGTLRSHLYGTDLPPLSWQRLEICIGVARGLHLYLHTGAAQSIHRDVKSANILLNENFV  
AKVADFGISKIVPALDQTHVSTVVKGTFGYLDPEYFRQQQLTEKS  
>pac.pt.4.13  
TLEDGTKVAVKRGNPRSGQGLTEFQTEIEMLSKLRHRHLVSLIGYCNESSEMILVYEFMA  
NGTLRRLHLCGADLPPLSWQRLEICIGAAKGLHLYLHTGAAQSIHRDVKSANILLNENFV  
AKVADFGISKIVPALDQTHVSTVVKGSFGYLDPEYFRQQQLTEKS  
>pac.pt.4.14  
VLRDNTKIAVKRCVPGSEQGVPEFQTEITVLSKIRHQHLVALIGYCEKQSEMILVYEFME  
KGPLRNILYGSELPLPSLWKQSLLEICIGSARGLHLYLHTGSAQGIHRDVKSTNILLDENYV  
TKVADFGLSRSGPCVDETHVSTGVKGSFGYLDPEYFRQQQLTDKS  
>pac.pt.5.102  
VLKNKMTVAVKRSDPGGDQGLLEFQREIIILSSIRHRHLVSLIGYCDERSEMILVYEFME  
KGTLRSHLYNSDPLPSLWKQRLEICIGSARGLHLYLHTGVAGGIHRDIKSTNILLDENYV  
AKVADFGLSREVPVEHSRGGYVSTAVKGTFGYLDPEYFRHQRLTEKSDVYSFGVVLL  
>pac.pt.5.103  
VLGDGTKVAVKRGNPLSQGLAEFRTEIEMLSQFRHRHLVSLIGYCDERKEMILVYEFME  
NGTLKSHLYGSLNPLPSLWKQRLEICIGSARGLHLYLHTGSTKAIHRDVKSANILLDENLM  
AKVADFGLSKTGPEIDQTHVSTAVKGSFGYLDPEYFRQQQLTEKSDVYSFGVVLF  
>pac.pt.5.104  
EIDDGTLVAIKRAHPQSQQGLREFEFTEIEMLSKLRHRHLVSMIGFCEEQNEMILVYEFMA  
NGTLRSHLFGSDLPPLTWKQRLDVCIGAARGLHLYLHTGAERGIHRDVKTNTNILLDENFV  
AKMADFGLSKTGPALHHTVSTAVKGSFGYLDPEYFRKQHLTEKSDVYSFGVVLF  
>pac.pt.5.106  
VLKNKMTVAVKRSDPGGDQGLLEFQREIIILSSIRHRHLVSLIGYCDERSEMILVYEFME  
KGTLRSHLYNSDPLPSLWKQRLEICIGSARGLHLYLHTGVAGGIHRDIKSTNILLDENYV  
AKVADFGLSREVPVEHSRGGYVSTAVKGTFGYLDPEYFRHQRLTEKSDVYSFGVVLL  
>pac.pt.5.107  
VMEDGTKVAVKRSNPLSQGLAEFRTEIEMLSQFRHRHLVSLIGYCDERKEMILVYEFME  
NGTLNSHLYGSLNPLPSLWKQRLEICIGSARGLHLYLHTGFPKDIHRDVKSANILLDENLM  
AKVADFGLSKTGPGIDQTHVSTAVKGSFGYLDPEYFIMQRLTEKSDVYSFGVLLF  
>pac.pt.5.110  
KRSEPRDQGLLEFQREIIILSNIRHRHLVSLIGFCDEQSEMILVCEFMKGTLRSHLYN  
SDPLPSLWKQRLEICIGSARGLHLYLHTGVAGGIHRDIKSTNILLDENYVAKVADFGLSR  
EVPVEHSRGGYVSTAVKGTFGYLDPEYFRHQRLTEKSDVYSFGVVLL  
>pac.pt.5.113  
VLKNKMTVAVKRSDPGGDQGLLEFQREIIILSSIRHRHLVSLIGYCDERSEMILVYEFME  
KGTLRSHLYNSDPLPSLWKQRLEICIGSARGLHLYLHTGVAGGIHRDIKSTNILLDENYV  
AKVADFGLSREVPVEHSRGGYVSTAVKGTFGYLDPEYFRHQRLTEKSDVYSFGVVLL  
>pac.pt.2.202  
KGEIDDGTLVAIKRAHPQSQQGLREFEFTEIEMLSKLRHRHLVSMIGFCEEQNEMILVYEF  
MANGTLRSHLFGGDLPLTWKRRLDVCIGAARGLHLYLHTGAERSTIHRDVKTNTNILLDEN  
FVAKMADFGLSKTGPSLDHTVSTAVKGSFGYLDPEYFRQQQLTEKSDVYSFGVVLF  
>pac.pt.2.203

KGVLDRDGTAVKRGVNSPQQGFAEFWTEIEMLSQLRHRHLVSMIGYCDEQKEMILVY EY  
MENGLTRNHLVYSELPILSWKQRLEICIESARGHLHLHTGSKAI IHRDVKSANILLDEN  
LMAKVADFGLSKAGPEIDQTHVSTAVKGSFGYLDPEYFRRQQLTEKSDVYSFGVVLF  
>pac.pt.2.205  
KGEIDDGTVAIKRAHPQSQQGLREFETEIEMLSKLRHRHLVSMIGFCEEQNEMILVY EY  
MANGTLRSHLFGNDLPPLTWKQRDVCIGAARGLHHLHTGAERGI IHRDVKTTNILLDEN  
FVAKMADFGLSKTGPALEHTHVSTAVKGSFGYLDPEYFRKQHLTEKSDVYSFGVVLF  
>pac.pt.2.207  
RGEIDDGTAAIKRAHPQSEQGLAEFETEIEMLSKLRHRHLVSMIGFCEEQNEMILVY EY  
MANGTLRSHLFGGDLPLTWKRRLDVCIGAARGLHHLHTGAERSTIHRDVKTTNILLDEN  
FVAKMADFGLSKTGPALEHTHVSTAVKGSFGYLDPEYFRKQHLTEKSDVYSFGVVLF  
>pac.pt.2.209  
KGVMEDGTAVKRSNPLSQGLAEFRTEIEMLSQFRHRHLVSLIGYCDEQKEMILVY EY  
MENGLTNSHLYGNSFNPSLWKQRLEICIGSARGHLHLHTGFPKDI IHRDVKSANILLDEN  
LMAKVADFGLSKTGPIDQTHVSTAVKGSFGYDPPEYFIMQRLTEKSDVYSFGVLLL  
>pac.pt.2.210  
RGEIDDGTAAIKRAHPQSEQGLAEFETEIEMLSKLRHRHLVSMIGFCEEQNEMILVY EY  
MANGTLRSHLFGGDLPLTWRRRLDVCIGAARGLHHLHTGAERSTIHRDVKTTNILLDEN  
FVAKMADFGLSKTGPSLDHTHVSTAVKGSFGYLDPEYFRRQQLTEKSDVYSFGVVLF  
>pac.pt.10.301  
LGELEDGTKLAIKRGVNSPQQGFAEFWTEIEMLSQLRHRHLVSMIGYCDEQSEMILVY EY  
MANGPLRDHIYGSTLPTLSWKQRLEICIGAARGLHHLHTGAAQGI IHRDVKTTNILLDEN  
LVAKVSDFGLSKTAPTLEQTHVSTAVKGSFGYLDPEYFRRQQLTEKSDVYSFGVVLF  
>pac.pt.10.306  
KGEIDGASTKVAIKRGVNSPQQGLAEFRTEIEMLSKLRHRHLVSLIGYCEENCEMILVY D  
YMAHGTLREHLYKTQKPLPWRQRLEICIGAARGLHHLHTGAKHTI IHRDVKTTNILLDE  
KWKVSDFGLSKTGPTLDHTHVSTVVKGSFGYLDPEYFRRQQLTDKSDVYSFGVVLF  
>pac.pt.10.309  
LGELEDGTKLAIKRGVNSPQQGFAEFWTEIEMLSQLRHRHLVSMIGYCDEQSEMILVY EY  
MANGPLRDHIYGSTLPTLSWKQRLEICIGAARGLHHLHTGAAQGI IHRDVKTTNILLDEN  
LVAKVSDFGLSKTAPTLEQTHVSTAVKGSFGYLDPEYFRRQQLTEKSDVYSFGVVLF  
>pac.pt.10.310  
LGELEDGTKLAIKRGVNSPQQGFAEFWTEIEMLSQLRHRHLVSMIGYCDEQSEMILVY EY  
MANGPLRDHIYGSTLPTLSWKQRLEICIGAARGLHHLHTGAAQGI IHRDVKTTNILLDEN  
LVAKVSDFGLSKTAPTLEQTHVSTAVKGSFGYLDPEYFRRQQLTEKSDVYSFGVVLF  
>pac.ptd.5.2  
VLKNKMTVAVKRSDPGGDQGLLEFQREIIILSSIRHRHLVSLIGYCDERSEMILVYEFME  
KGLRSHLYNSDLPSLSWKQRDLCIGSARGHLHLHTGVAGGI IHRDIKSTNILLDENYV  
AKVADFGLSREVPVEHSRGGYVSTAVKGTFGYLDPEYFRHQRLTEKSDVYSFGVVLL  
>pac.ptd.5.5  
VLKNKMTVAVKRSDPGGDQGLLEFQREIIILSSIRHRHLVSLIGYCDERSEMILVYEFME  
KGLRSHLYNSDLPSLSWKQRDLCIGSARGHLHLHTGVAGGI IHRDIKSTNILLDENYV  
AKVADFGLSREVPVEHSRGGYVSTAVKGTFGYLDPEYFRHQRLTEKSDVYSFGVVLL  
>pac.ptd.8.21  
KGVLNKTTVAVKRSDPGGDQGLLEFQREIIILSSIRHRHLVPLIGYCDERSEMILVYEF  
MEKGLRSHLYNSDLPSLSWKQRDLCIGSARGHLHLHTGVAGGI IHRDIKSTNILLDEN  
YVAKVADFGLSREVPVEHSRGGYVSTAVKGTFGYLDPEYFRHQRLTEKSDVYSFGVVLL  
>pac.ptd.8.22  
RGEIDDGTAAIKRAHPQSEQGLAEFETEIEMLSKLRHRHLVSMIGFCEEQNEMILVY EY  
MANGTLRSHLFGGDLPLTWRRRLDVCIGAARGLHHLHTGAERSTIHRDVKTTNILLDEN  
FVAKMADFGLSKTGPSLDHTHVSTTVKGSFGYLDPEYFRRQQLTEKSDVYSFGVVLF  
>pac.ptd.8.23  
KGVMEDGTAVKRSNPLSQGLAEFRTEIEMLSQFRHRHLVSLIGYCDEQKEMILVY EY  
MENGLTNSHLYGNSFNPSLWKQRLEICIGSARGHLHLHTGFPKAI IHRDVKSANILLDEN  
LMAKVADFGLSKTGPIDQTHVSTAVKGSFGYLDPEYFIMQRLTEKSDVYSFGVLLF  
>pac.ptd.9.41  
KGVVDGGLKVAIKRANPSSEQGVHEFQTEIEMLSKLRHRHLVSLIGYCEENEEMILVYDY  
MAYGTLREHLYKSNKPTLSWKQRLEICIGAARGLHHLHTGAKYTI IHRDVKTTNILLDEN  
WVAKVSDFGLSKTGPNLNQTHVSTVVKGSFGYLDPEYFRRQQLTEKSDVYSFGVVLF  
>pac.Erf.2  
QLRSRHRVAVKMLGKSKNGQEFINEVATIGRIHHVNVVRLIGFCSNGSKRALIYEFMPN  
GSLEKYTFQSQEKEERLSLSDWKMYEIALGVARGIEYLHRGCDIQILHFDIKPHNILLDEN  
FVPKISDFGLAKFYPIINDNTITLTAARGT  
>pac.Erf.3  
TLDHGETIVAVKVLNLQQGASKSFMACEALRNIRHRNLVKILTICSSMDFKGNDFKAL  
VFEFMPNGNLERWLHPETYHTQDELGNLFLQRLNIAIDVASALEYLHHCNCPPIIHC DL  
KPSNILLDNMTAHVGDGFLSRLHLETSNRSSQNQTSSIGIRGS  
>pac.Erf.4  
NSSSRWKTNSNICSEGVSTTRS IQDFYGRMQSIEKYSTSKSSQDHNFLLSVDFMGNDFK  
ALIFEFMTNGNLESWLHPNIDGQHQSRYLNI SQRLDMAMDVASALNYLHNQCPTPIVHCD



LKPSNVLLDDMSAHVGDVGLAKFLFRAPSDSGESQYSSVAIKGT  
>pac.Erf.5  
ILNGETIVAVKVLNLQQGASKSFMAECEALRNIRHRNLVKILTTCSSSTDFEGNDFKAL  
VFEFMPNGSLEKWLHPGADDAQDGLMNINLLQRLNIAIDVASALEYLHHHCQIPIIHCDL  
KPNNILLDNMTAHVGDVGLSRFLPEATNAFSAQNHSSSIGIRGS  
>pac.Erf.6  
LLNQGETNVAVKVFNLPHGASKSFMAECESLRNIRHRNLVKIVITSCSSIDFAGNDFKAL  
VYEFMSNGSLERWLYPNAEVAQVEQRNLNLLQRLNIAIDVASALDYLHNNCKTPIIHCDL  
KPNNILLDDDMVAHVGDVGLSRFLPMTINNSQTSSTSIGIKGS  
>pac.Erf.7  
IFHQDGRSVSAVKVLNLQQREASKTFMAECKALRNIRHRNLKILTSCSSVDFKGNDFK  
ALVLEFMSNESLESWLHPNIDEHQSRYLNFSQLRNIAIDVALALDYLHNNCPTPIVHCD  
LKPSNVLLDDEMTAHVGDVGLAKFLSRATSNSEGGQHSVAIKGT  
>pac.Erf.9  
QLRSGHHVAVKMLGKSKNGQEFINEVATIGRIHHVNVVQLIGFCSNGSKRALIYEFMPN  
GSLEKYTFSQEKEERLSLGDWDMYIAGVARGIEYLHRGCDIQILHFDIKPHNILLDEN  
FVFKISDFGLAKFYPIINDNTITLTAARGT  
>pac.Erf.10  
ILNGETIVAVKVLNLQQGASKSFMAECEALRNIRHRNLVKILTTCSSSTDFEGNDFKAL  
VFEFMPNGSLEKWLHPGADDAQDGLMNINLLQRLNIAIDVASALEYLHHHCQIPIIHCDL  
KPNNILLDNMTAHVGDVGLSRFLPEATNAFSAQNHSSSIGIRGS  
>pac.Erf.11  
MVHQDGRLVSAVKVLNLQQEASKTFMAECKALRNVRHRNLKIIITSCSSADFKGNEFK  
ALVLEFMPNGSLESWLHPRIDGQLQLRYLSISQRLNIAIDVALALDYLHNNCQIPIAHCD  
LKPSNVLLDNDTTHAVGDVGLAKFLYRATSNSEAGQNSLATIKGT  
>pac.Erf.13  
RLVDGRLVAVKVLNESKGGDDFINEVTTIGRTNHHNIVRLLGFCSEGSKRALIYEFMSN  
GSLEKFIYVDKPRMTQPLAWENLYQIAIGIAKGLEYLHRGCNTHILHLDIKPHNILLDEK  
FCPKISDFGLAKQCLTGESAVSLHGARGT  
>pac.Erf.14  
VLREDEAVVAVKVLNLQQHGASKSFISECKTLTNIRHRNLVKILTACSSVDFRMNDFKAL  
VFEFMSNGNLDEWLHPRIQQHQLKSLSLIQRLNIAIDVASALEYLHFCQIPIVHCDLK  
PSNVLLDEDMTAHVGDVGLARFLFETSNISSKNQTSISAGLKGS  
>pac.Erf.2B.210  
SLIKWPQRRVAVKRLNENVNGGEREFQNEMTS IGRTYHRNLVRLLYGQCQDGHQRLLVY  
MSKGLADFLFKPDCPPSWDERVRIALDIARGILYLHEECETQI IHCDIKPQNILMDEYQ  
CAKIADFLGAKLLKPDQTRTFTGIRGTRGYVAPEWHRNLPITVK  
>pac.Erf.2B.211  
ILSSSQVVAVKRLNEMVKEGENEFQNEMTTIGRTHHRNLVRLLYGCHEGTNRLLVY  
SNGSLADFLFKYERHPNWDERVGIALHIARGILYLHEECETQI IHCDIKPQNILIDEYRC  
AKIADFLGAKLLKPNQSMSTSTGIRGTRGYVAPEWQNMPIITVK  
>pac.W.ArA.3  
YAENQILGRGGYGTVYKGIADHRTVAVKKSIVDQSQIEQFINEVVILSQINHRNVVRL  
LGCCLETEVPLLIYEFINNGTSLSHIHDESHISSISWGCLRLRIATETAALAYLHSAASP  
PIIHRDIKSTNILLDEDYTAKIADFGASRLVPLDYTQLTTLVQGTGLGYLDPEYFHSSQLT  
>pac.W.ArA.4  
FSEKNLIGGGGFGVYKGTLSDGTWVAVKRIIESDFHGD AEF CNEVEIISNLKHRNLVLL  
RGCCMTDEESSKQRYLVY EYMPNGNLKDHFLLDKQPLSWPQRKSIILDVAKGIAYLHYG  
VKPAIYHRDIKPTNILLDADMKARVADFLVKQSREGQSQLITRVAGTHGYLAPEYALY  
QLT  
>pac.W.ArA.5  
FSQKNLIGRSGFGVYKGIPLDGTWVAVKKITESDFQGD AEF CNEVEIISNLKHRNLVPL  
RGCCVIDGDCDEGSGKQRYLVYEHMPYGNLEDHLFSLNPHSGIFNKQPLSWPQRKSIILD  
VAKGIAYLHYGVKPAIYHRDIKPTNILLDADMKARVADFLVKQSREGQSHLITKVAGTH  
GYLAPEYALYQLT  
>pac.W.ArA.6  
YAENQILGRGGYGTVYKGIADHRTVAVKKSIVDQSQIEQFINEVVILSQINHRNVVRL  
LGCCLETEVPLLIYEFINNGTSLSHIHDESHISSISWGCLRLRIATETAALAYLHSAASP  
PIIHRDIKSTNILLDEDYTAKIADFGASRLVPLDHTQLTTLVQGTGLGYLDPEYFHSSQLT  
>pac.W.ArA.7  
YAENRILGRGGYGTVYKGIADHRIVAVKKSIVDESQIEQFINEVVILSQINHRNVVRL  
LGCCLETEVPLLIYEFINNGTLFHHIHDEGHVSSISWGSRMRIAAETAGVLAYLHSAASI  
PIIHRDIKSTNILLDEKYTAKVADFGASRLVPLDQTQLTTLVQGTGLGYLDPEYFNSSQLT  
>pac.W.ArA.8  
YNENRILGQGSQGTVYKGMPLDGRIVA I K K S K L V N E G Q I E Q F I N E L A I L S H I N H R N V V K L  
LGCCLETEVPLLVYEFISNGTLFYHIHEKSEEFSSWDNRLRIATEVAGALAYLHSAASI  
PIYHRDIKSTNILLIDGKYTAKVSDFGISRSVPI DKTHLTT SVQGTFGYMDPEYFQSNQFT  
>pac.W.ArA.9  
YNENRILGQGGQGTVYKGMPLDGRIVA I K K S K I V N E G Q I E Q F I N E V V I L S H I N H K N V V K L  
LGCCLETEVPLLVYEFISNGTLFHHIHVQSEEFQCSWDNRLRIATELANALAYLHSAASI

PIYHRDIKSTNILLDSKYTAKVSDFGISRSPNDKTHLTTTLVQGTFGYLDPEYFQSSQFT  
>pac.W.ArA.11  
YAENQILGRGGYGTVYKGIADHRTVAVKKSIVDQSQIEQFINGVVILSQINHRNVVRL  
LGCCLETEVPLLIYEFINNGTSLHHIHDESHISSISWGCRRLRIATETAALAYLHSAASP  
PIIHRDIKSTNILLDEDTAKIADFGASRLVPLDHTQLTTTLVQGTGLGYLDPEYFHSSQLT  
>pac.W.ArA.12  
FSQKNLIGRGSFGVYKGIPLDGTWVAVKKITESDFQGDAEFCNEVEIISNLKHRNLVPL  
RGCCVIDGDCDEGSGKQRYLVYEHMPYGNLEDHLFLSNPRSGIFNKQPLSWPQRKSIILD  
VAKGIAYLHYGVKPAIYHRDIKPTNILLDADMARVADFGLVKQSREGQSHLITKVAGTH  
GYLAPEYALYQQLT  
>pac.W.ArA.14  
YAENRILGRGGYGTVYKGIADHRIVAVKKSIVDENQIEQFINEVVILSQINHRNVVRL  
LGCCLETEVPLLIYEFINNGTLFHHIHDEGHVSSISWEIRLRIAAETAGALAYLHSAVST  
PIIHRDIKSANILLDENYTSKIADFGASRLVPLDQTQLTTTLVQGTGLGYLDPEYFHSSQLT  
>pac.W.ArB.305  
NGFSEKQRLGTGAYGTVYAGKLNVDWVAIKKIRHRDNDGIEQVMNEIKLLSSVSHPNLV  
RLLGCCIEKGEQILVYEFMPNGTLSQHLQREISTGLPMMTRLTATETAHAIAHLHSAIN  
PPIFHRDIKSSNILLDYNYSKVADFGLSRLGMTESHSISTAPQGTGPGYLDPQYHQNFHL  
SDKX  
>pac.W.ArB.312  
NGFSEKQRLGTGAYGTVYAGKLNVDWVAIKKIRHRDNDGIEQVMNEIKLLSSVSHPNLV  
RLLGCCIEKGEQILVYEFMPNGTLSQHLQREISTGLPMMTRLTATETAHAIAHLHSAIN  
PPIFHRDIKSSNILLDYNYSKVADFGLSRLGMTESHSISTAPQGTGPGYLDPQYHQNFHL  
SDKX  
>pac.W.VtA.101  
TVYKGMMLVDGMIVAIKKSIVDEGQIEQFIYEVVMLSQINHRNVVKKLGCCLETEVPLLV  
YEFISKGTFLFHYIHDQSEEFNSWDNRLKIATDVATALAYLHSAASMPIYHRDIKSSNIL  
LDDKYIAKISDFGISRSIPTDKTHLTTTLVQGTGLGYLDPEYFQSSQFTEKX  
>pac.W.VtA.102  
TVYKGMMLVDGTIVAIKKSIVDESQIEQFINEVVMLSQINHRNVVKKLGCCLEAEVPLLV  
YEFISNGTLFHYIHDQSEKFPNSWDNRLKIATDVAAALAYLHSAASIPYHRDIKSSNIL  
LDDKYIAKISDFGASRSIPTDKTHLTTTLVQGTGFGYLDPEYFQSNQFTEIX  
>pac.W.VtA.105  
TVYKGMMLVDGMIVAIKKSIVDEGQIEQFIYEVVMLSQINHRNVVKKLGCCLETEVPLLV  
YEFISKGTFLFHYIHDQSEEFNSWDNRLKIATDVATALAYLHSAASMPISHRDIKSSNIL  
LDDKYIAKISDFGISRSIPTDKTHLTTTLVQGTGLGYLDPEYFQSSQFTEKX  
>pac.W.VtA.107  
TVYKGMMLHCGRIVAIKKAIVDEGQVEQFINEVVILSQINHRNVVKKLGCCLETKVPLLV  
YEFISNGTLFYHIHDQSEEFPIISWVNLRIATEVAGALAYLHSAASIPINHRDIKSTNIL  
LDEKYNKAVSDFGISRVSATDKTHLTTTVQGTGFGYFDPEYFQSSQFTEKX  
>pac.W.VtA.108  
TVYKGMMLQDGRNVATKKSRIVDEGQIEQFINEVVILSQINHRNVVKKLGCCLETEVPLLV  
YEFISNGTLFYHIHDQSEEFPIISWVNLRIATEVAGALAYLHSAASIPYHRDIKSTNIL  
LDDKCKAKVADFGTSRSVSDKTHLTTTLVQGTGLGYLDPEYFQSSQFTEKX  
>pac.W.VtA.109  
TVYKGILEDHRIVAIKKSIVDESQIEQFINEVVILSQINHRNVVKKLGCCLETEVPLLI  
YEFINNGTLFHHIHDEGHVSSISWESRLRIAAETAGTLAYLHSAASIPYHRDIKSTNIL  
LDDNYTAKVADFGASRLVPLDQTQLTTTLVQGTGLGYLDPEYFQSSQFTEKX  
>pac.W.VtA.110  
TVYKGMMLDGRIVAIKKSIVNEGQIEQFINEVVILSHINHNKVVKKLGCCLETEVPLLV  
YEFISNGTLFHHIHDEGHVSSISWESRLRIAAETAGTLAYLHSAASIPYHRDIKSTNIL  
LDSKYTAKVSDFGISRSPNDKTHLTTTLVQGTGFGYLDPEYFQSSQFTEKX  
>pac.W.VtA.113  
TVYKGMMLVDGMIVAIKKSIVNEGQTEQFINELVILSHINHRNVVKKLGCCLETEVPLLV  
YEFISNGTLFHHIHEKSEEFSSWDNRLRIATEVAGALAYLHSAASIPYHRDIKSTNVL  
IDGKYTAKVSDFGISRSPIDKTHLTTTSVQGTGFGYMDPEYFQSNQFTEKX  
>pac.W.VtB.201  
HYNDNRILGQGGQGTVYKGMMLQDGRIVAVKATMVDEGQVEQFINEVVILSQINHRNVK  
LLGCCLETEVPLLVYEFISNGTLFYHIHDPTTEEFVMSWDNRLRIATEVAGALAYLHSAAS  
IPYHRDVKSSTNILLDDKHSKVSDFGTARSVSDKTHLTTTVQGTGLGYLDPEYFQTSQF  
TDKSDVYSFGVVLVELLTGKPIISLINSQERRNLVTHFIQLTKENRIFEILDDQVVEGRK  
EEIEAVVNIKRCLNFNGK  
>pac.W.VtB.203  
NYNENRILGQGGQGTVYKGMMLHCGRIVAIKKAIVDEGQVEQFINEVVILSQINHRNVK  
LLGCCLETEVPLLVYEFISNGTLFHHIHSQTEDFLMSWDNRLRIATEVAGALAYLHSSVS  
MPIYHRDVKSSTNILLDDKYRAKVSDFGTARSVPVSKTHLTTTVQGTGMGYLDPEYFQTSQF  
TDKSDVYSFGVVLVELLTGKPIISLIGSQEKRNLVTYFIQSTKKNRLEILDAQIVEGQK  
EELEVAGLAKRCVTLNGK  
>pac.W.VtB.208  
HYNENRILGQGGQGTVYKGMMLHCGRIVAIKKAIVDEGQVEQFINEVVILSQINHRNVK

LLGCCLETEVPLLVYEFISNGTLFHHSQTEDFLMSWDNRLRIITEVAGALAYLHSSAS  
MPIYHRDIKSTNILLDDKCKAKVADFGTSRSVSVDKTHLTTLVQGTGLGYLDPEYFQSSQF  
TDKSDVYSFGVVLVELLTGEKPI SVFAQERRNLVYFIQS IKENLLFEILDDR IIEGRKE  
EIEAVASLAKRCLNLNGR

>pac.W.VtB.209

HFNENRILGQQGQGTVYKGMVLVNGRIVAVKRSKIVNEGQIEQFINEVVILSHINHRNVVK  
LLGCCLETEVPLLVYEFVSNGLTFHHSQTEDFLMSWDNRLRIAAEAAGALAYLHSTAS  
IPIYHRDIKSTNILLDSKYTAKVSDFGISRSVPIDKTHLTTLVQGTFGYLDPEYFQSSQF  
TEKSDVYSFGVVI VELLTGEKPISSVKSKEKMN LATHFLSSIRENCLFEILDAQVVKEDR  
KEEIEIVANLAKRCLNLNGR

>pac.W.Ch.152

MLGDGRIVAVKKSIVNECQIEQFINEVFILSHINHRNVVKLLGCCLETEVPLLVYEFIS  
NGTLFHHSQTEDFLMSWDNRLRIAAEVAGTLAYLHSSAS IPIYHKDIKSTNILLDGKY  
TAKVADFGTSRSIPNDKTHLTTLVQGTFGYLDPEYFQSSQFTEKSDVX

>pac.W.Ch.156

ILEDHRIVAVKKSIVDESQIEQFINEVVILSHINHRNVVKLLGCCLEAEVPLLVYEFIS  
NGTLFHHSQTEDFLMSWDNRLRIAAEVAGTLAYLHSSAS IPIYHKDIKSTNILLDDNY  
TAKVADFGASRLVPLDQTLTTLVQGTGLGYLDPEYFQSSQFTEKSDVX

>pac.W.Ch.157

MLVDGTIVAIKKSIVDESQIEQFINEVVILSHINHRNVVKLLGCCLEAEVPLLVYEFIS  
NGTLFHHSQTEDFLMSWDNRLRIAAEVAGTLAYLHSSAS IPIYHRDIKSSNILLDDKY  
IAKISDFGASRSIPTDKTHLTTLVQGTFGYLDPEYFQSSQFTEKSDVX

>pac.W.Ch.158

MLLDGRIVAIKKSIVNEGQIEQFINEVVILSHINHRNVVKLLGCCLETEVPLLVYEFIS  
NGTLFHHSQTEDFLMSWDNRLRIAAEVAGTLAYLHSSAS IPIYHRDIKSTNILLDSKY  
TAKVSDFGISRSVPNDKTHLTTLVQGTFGYLDPEYFQSSQFTEKK

>pac.W.Ch.160

MLLDGRIVAIKKSIVNEGQIEQFINEVVILSHINHRNVVKLLGCCLETEVPLLVYEFIS  
NGTLFHHSQTEDFLMSWDNRLRIAAEVAGTLAYLHSSAS IPIYHRDIKSTNILLDSKY  
TAKVSDFGISRSVPNDKTHLTTLVQGTFGYLDPEYFQSSQFTEKSDVX

>pac.W.Ch.162

VLSDGRIIAVKKSKDANLIRLFVNEAIIILSKINHTNVVKLIGYCKETEVPPLLVYEFVING  
TLAHLHELGLRSSLGWGDRKIAAEVANAIACMHSCKIIHRDIKSTNILLDENFTAKLC  
DFGLSRTVPSDQDHVSTKELWGTEGYVDPDYIQTGQLTGKSDVX

>pac.W.Ch.164

ILADHRIVAVKKSIVDESQIEQFINEVVILSHINHRNVVKLLGCCLETEVPLLIYEFIN  
NGTLFHHSQTEDFLMSWDNRLRIAAEVAGTLAYLHSSAS PPIIHRDIKSTNILLDEDY  
TAKIADFGASRLVPLDYTLTTLVQGTGLGYLDPEYFHSSQLTEKSDVX

>pac.BRI.L.2

EATNGFHNDSLVSGGGFDVYKAQLKDGSTVAIKKLIHVSGQGDREFTAEMETIGKIKHR  
NLVPLLG YCKVGEERLLVY EYMRFGSLEDILHDDRKAGIKLNWVARRKIAIGAARGLAFL  
HHNCIPHIIHRDMKSSNVLLDENLEARVSDFGMARLMSAMDTLSVSTLAGTPGYVPPEY  
YQSFRCSTKGDVYSYGVVLELLTGLKQPTDSADFGDNNLVGWVKQHARLRI TDVDFPELM  
KEEPNLEMELEHLKIAACACLD DRSWR RPTMIQV

>pac.BRI.L.6

KLTFADLLEATNGFHNDSLVSGGGFDVYKAQLKDGCVVAIAKLIHVSGQGDREFTAEME  
TIGKIKHRNLVPLLG YCKVREERLLVY EYMRFGSLDDILHDKRAGIKLNWAARRKIAIG  
AARGLAFLHHNCTPHIIHRDMKSSNVLLDGNLEARVSDFGMARLMSAMDTLSVSTLAGT  
PGYVPPEYYQSFRCSTKGDVYSYGVVLELLTGLKPTDSTDFGDNLVGWVKQHAKLKIS  
DVFDPEIMKEDPSLEVELLQHLKIAACACLSERPSRRP SMIQVMAMFKEIQA

>pac.BRL.B.8

ADSLIGSGGFGEVYKAQLKDGCVVAIAKLIHVSGQGDREFTAEMETIGKIKHRNLVPLLG  
YCKIGEERLLVY EYMKWGSLETVLHDR TNGGSKLNWAARKKIATGSARGLAFLHHNCIP  
HIIHRDMKSSNVLLDENLEARVSDFGMARLMNAVDTHLSVSTLAGTPGYVPPEYYQSFRC  
TTKGDVYSYGVILLELVSGKRPIDPSEFG

>pac.BRL.B.9

ADSLIGSGGFGEVYKAQLKDGCVVAIKRLIHVSGQGDREFTAEMETIGKIKHRNLVPLLG  
YCKIGEERLLVY EYMKWGSLETVLHDR AKRGSKLDWAARKKI AVGSARGLAFLHHNCIP  
HIIHRDMKSSNVLLDENLEARVSDFGMARLMNALDTHLSVSTLAGTPGYVPPEYYQSFRC  
TTKGDVYSYGVILLELVSGKRPIDPSEFG

>pac.BRL.B.12

ADSLIGSGGFGEVYKAQLKDGCVVAIAKLIHVSGQGDREFTAEMETIGKIKHRNLVPLLG  
YCKIGEERLLVY EYMKWGSLETVLHDR AKRGSKLDWAARKKI AVGSARGLAFLHHNCIP  
HIIHRDMKSSNVLLDENLEARVSDFGMARLMNALDTHLSVSTLAGTPGYVPPEYYQSFRC  
TTKGDVYSYGDILLELVSGKRPIDPSEFG

>pac.BRL.B.14

ADSLIGSGGFGEVYKAQLKDGCVVAIAKLIHVSGQGDREFTAEMETIGKIKHRNLVPLLG  
YCKVGEERLLVY EYMKWGSLETVLHDR AKRGSKLDWAARKKI AVGSARGLAFLHHNCIP  
HIIHRDMKSSNVLLDENL GARVSDFGMARLMNALDTHLSVSTLAGTPGYVPPEYYQSFRC  
TTKGDVYSYGVILLELVSGKRPIDPSEFG

>pac.BRL2.102

ASMI GCGGFGEVFKATLKD GSSVAIKKLIRLSCQGDREFMAEMETLGKIKHRNLVPLLY  
CKIGEERLLVYEFMEFGSLEEMLHGRTRAREGRRIITWEERKKIARGAAKGLCFLHHNCI  
PHIIHRDMKSSNVLLDHDMEARVSDFGMARLISALDTHLSVSTLAGTPGYVPPEYYQSFR  
CTAKGDVYSFGVVLLELLTGKRPTDKEDFGDTNLVGWVKMTVREGRGKEVIDPELLSAIK  
GGDEDEAEFEFKEMVRYLEITMQCVEDFPSRRPNMLQV

>pac.BRL2.108

ASMI GCGGFGEVSKATLKD GSSVAIKKLIRLSCQGDREFMAEMETLGKIKHRNLVPLLY  
CKIGEERLLVYEFMEFGSLEEMLHGRTRAREGRRIITWEERKKIARGAAKGLCFLHHNCI  
PHIIHRDMKSSNVLLDHDMEARVSDFGMARLISALDTHLSVSTLAGTPGYVPPEYYQSFR  
CTAKGDVYSFGVVLLELLTGKRPTDKEDFGDTNLVGWVKMTVREGRGKEVIDPELLSAIK  
GGDEDEAEFEFKEMVRYLEITMQCVEDFPSRRPNMLQV
