# Supplementary material for: Kinase domain-targeted isolation of defense-related receptor-like kinases (RLK/Pelle) in Platanus × acerifolia: phylogenetic and structural analysis
Source: PubMed Central journal article supplement (PMC4295470; doi:10.1186/1756-0500-7-884), 2014-12-08
Supplement: 13104_2014_3456_MOESM4_ESM.pdf [file 13104_2014_3456_MOESM4_ESM.pdf]

**Additional file 4. Reference sequences included in the phylogenies for comparison and to root the trees.** Where RLK subfamilies or generic terms (i.e. Pto-like) are cited, all sequences reported in the source were tested in the phylogenies, except pseudogenes or putative proteins with truncated kinase domains.

| <b>I - Reference sequences for phylogenies at the subfamily level</b>                                             |                                                           |                                                                                                                                                                                                                                              |
|-------------------------------------------------------------------------------------------------------------------|-----------------------------------------------------------|----------------------------------------------------------------------------------------------------------------------------------------------------------------------------------------------------------------------------------------------|
| Proteins                                                                                                          | Species                                                   | Source                                                                                                                                                                                                                                       |
| CrRLK1L                                                                                                           | <i>Arabidopsis</i> and rice                               | [50]                                                                                                                                                                                                                                         |
| <i>Pto</i> and relatives                                                                                          | <i>Solanum pimpinellifolium</i>                           | [39]                                                                                                                                                                                                                                         |
| WAK-like                                                                                                          | <i>Arabidopsis</i>                                        | [4, 49]                                                                                                                                                                                                                                      |
| LRR X                                                                                                             | <i>Arabidopsis</i>                                        | [4]                                                                                                                                                                                                                                          |
| LRR XII                                                                                                           | <i>Arabidopsis</i>                                        | [4]                                                                                                                                                                                                                                          |
| Best Pac Blastp matches                                                                                           | <i>Arabidopsis</i> , poplar and rice                      | NCBI GenBank                                                                                                                                                                                                                                 |
| <b>II - Reference sequences for phylogenetic investigation into the relations among Pto, Pto-like and CrRLK1L</b> |                                                           |                                                                                                                                                                                                                                              |
| Proteins                                                                                                          | Species                                                   | Source                                                                                                                                                                                                                                       |
| Best Pto Blastp matches (i.e. CrRLK1L)                                                                            | <i>Arabidopsis</i> , Poplar, Castor bean, Grapevine, Rice | NCBI GenBank                                                                                                                                                                                                                                 |
| Best Blastp matches obtained using wild/cultivated strawberry and bean Pto-like                                   | <i>Fragaria vesca</i> , <i>Phaseolus vulgaris</i>         | Phytosome<br><br><i>F. vesca</i> :<br>mrna04250.1-v1.0-hybrid<br>mrna16583.1-v1.0-hybrid<br>mrna14010.1-v1.0-hybrid<br>mrna23363.1-v1.0-hybrid<br><br><i>P. vulgaris</i> :<br>Phvul.003G239400.1<br>Phvul.004G038800.1<br>Phvul.007G188300.1 |
| <i>Pto</i> and relatives                                                                                          | <i>Solanum pimpinellifolium</i>                           | [39]                                                                                                                                                                                                                                         |
| Pto-like                                                                                                          | Wild tomato species                                       | [AF4.1]* [76]                                                                                                                                                                                                                                |
| Pto-like                                                                                                          | <i>Capsicum</i> spp.                                      | NCBI GenBank<br>Acc. Nos: AY316952, AY316954-67                                                                                                                                                                                              |
| Pto-like                                                                                                          | <i>Solanum</i> spp.                                       | [70]                                                                                                                                                                                                                                         |
| Pto-like                                                                                                          | <i>Nicotiana repanda</i>                                  | [75]                                                                                                                                                                                                                                         |
| Pto-like                                                                                                          | <i>Phaseolus vulgaris</i>                                 | [69]                                                                                                                                                                                                                                         |
| Pto-like                                                                                                          | Cultivated and wild strawberry                            | [74]                                                                                                                                                                                                                                         |
| Pto-like                                                                                                          | <i>Musa acuminata</i>                                     | [73]                                                                                                                                                                                                                                         |
| Whole CrRLK1L subfamily                                                                                           | <i>Arabidopsis</i> and rice                               | [50]                                                                                                                                                                                                                                         |
| Whole CrRLK1L subfamily                                                                                           | Poplar                                                    | [5]                                                                                                                                                                                                                                          |
| Whole CrRLK1L subfamily                                                                                           | Moss                                                      | NCBI GenBank, Acc. Nos:<br>XM_001757821, XM_001757822,<br>XM_001760648, XM_001760727,<br>XM_001779604                                                                                                                                        |
| Whole CrRLK1L subfamily                                                                                           | Tomato                                                    | [6]                                                                                                                                                                                                                                          |
| CrRLK1L-like                                                                                                      | <i>Platanus × acerifolia</i>                              | This paper                                                                                                                                                                                                                                   |

---

### III - Proteins used to root the trees

---

| Proteins                                                                   | Species               | Source            |
|----------------------------------------------------------------------------|-----------------------|-------------------|
| CTR1, Raf kinase family                                                    | <i>Arabidopsis</i>    | [3], NCBI GenBank |
| MPK3, MAP kinase family                                                    | <i>Arabidopsis</i>    | [3], NCBI GenBank |
| CPK7, CDPK family                                                          | <i>Arabidopsis</i>    | [3], NCBI GenBank |
| Several other representatives of eukaryotic protein kinase families (ePKs) | <i>Many species</i>   | [3]               |
| APH(3')III (aminoglycoside 3'-phosphotransferase)                          | <i>Staphylococcus</i> | [3]               |

---

\* References not reported in the text.

AF4.1 Rose LE, Langley CH, Bernal AJ, Michelmore RW: **Natural variation in the Pto disease resistance gene within species of wild tomato (*Lycopersicon*). I. Functional analysis of *Pto* alleles. Population genetics of *Pto*. *Genetics*. 2005, **171**:345-357.**
