# Supplementary material for: Kinase domain-targeted isolation of defense-related receptor-like kinases (RLK/Pelle) in Platanus × acerifolia: phylogenetic and structural analysis
Source: PubMed Central journal article supplement (PMC4295470; doi:10.1186/1756-0500-7-884), 2014-12-08
Supplement: 13104_2014_3456_MOESM5_ESM.pdf [file 13104_2014_3456_MOESM5_ESM.pdf]

**Additional file 5. The extracellular domain of *Platanus × acerifolia* (*Pac*) RLK/Pelles.** Pairwise comparison between selected gene fragments obtained in this work, and the overlapping RLK/Pelle isotigs extracted from a 454 FLX dataset of a *Platanus × acerifolia* (*Pac*) transcriptome (Pilotti M., Brunetti A., Iacono M. and Pindo M. unpublished data). **A** Spanning regions and identity values. **B** The isotigs display a region 5'-upstream the kinase domain, which includes putative extracellular domains typical of the RLK/Pelle subfamilies dealt with in this work (output data from Pfam). This is a confirmation of the phylogenetic identification of the gene fragments. A SMART analysis predicted in a confident manner transmembrane domains in all the isotigs, which were located upstream the kinase domain and downstream the putative extracellular domains.

## A

| PCR gene fragments<br>(length, nt) | Classification at the<br>subfamily level | Isotigs<br>KF208644-KF208653<br>(length, nt) | Spanning<br>region | Identity<br>score<br>(nt) | Indel      |
|------------------------------------|------------------------------------------|----------------------------------------------|--------------------|---------------------------|------------|
| pac.pt.10.306<br>(535)             | CrRLK1L                                  | 1<br>(2322)                                  | 535                | 99.81                     | 1<br>(1nt) |
| pac.ptd.5.2<br>(533)               | CrRLK1L                                  | 2<br>(1707)                                  | 533                | 99.81                     | -          |
| pac.pt.2.210<br>(533)              | CrRLK1L                                  | 3<br>(2499)                                  | 533                | 100                       | -          |
| pac.Erf.3<br>(493)                 | LRR XII                                  | 4<br>(2406)                                  | 493                | 89.05                     | 1<br>(3nt) |
| pac.x.5.19<br>(496)                | LRR XII                                  | 5<br>(2778)                                  | 496                | 91.13                     | -          |
| pac.x.5.4<br>(487)                 | LRR XII                                  | 6<br>(3165)                                  | 487                | 93.43                     | -          |
| pac.x.6.123<br>(502)               | LRR XII                                  | 7<br>(1131)                                  | 502                | 88.25                     | 1<br>(1nt) |
| pac.W.Ch.156<br>(503)              | WAK-Like                                 | 8<br>(2283)                                  | 503                | 88.47                     | -          |
| pac.BRI.L.2<br>(825)               | LRR X-BRI1                               | 9<br>(1071)                                  | 136 <sup>a</sup>   | 100                       | -          |
| pac.BRL2.102<br>(832)              | LRR X-BRL                                | 10<br>(2109)                                 | 832                | 99.76                     | -          |

<sup>a</sup> pac.BRI.L.2 overlapped the isotig in head-to-tail fashion

## B

| <i>Pac</i> (S1s/43)<br>RLK/Pelle Isotigs | Classification | Domain with significant matches <sup>1</sup>                                                         | E-value                                          | Domain with insignificant matches <sup>a</sup>                                         | E-value                                    |
|------------------------------------------|----------------|------------------------------------------------------------------------------------------------------|--------------------------------------------------|----------------------------------------------------------------------------------------|--------------------------------------------|
| 1                                        | CrRLK1L        | Malectin like (80-444)<br>Pkinase (574-772)                                                          | 3.6e-64<br>3.2e-44                               | SKG6 (473-513)                                                                         | 0.2                                        |
| 2                                        | CrRLK1L        | Malectin like (2-132)<br>Pkinase (229-502)                                                           | 1.1e-16<br>1.1e-46                               |                                                                                        |                                            |
| 3                                        | CrRLK1L        | Malectin like (10-347)<br>Pkinase (498-768)                                                          | 9.8e-54<br>7.8e-47                               |                                                                                        |                                            |
| 4                                        | LRR XII        | LRR8 (291-351)<br>Pkinase (483-789)                                                                  | 1.4e-06<br>3.4e-43                               | LRR8 (1-56)<br>LRR4 2 copies (170-218)<br>LRR8 (221-279)                               | 5.8e-05<br>9e-05<br>0.001                  |
| 5                                        | LRR XII        | LRRNT 2 (53-92)<br>LRR6 (487-509)<br>LRR4, 2 copies (513-552)<br>LRR8 (561-620)<br>Pkinase (727-921) | 1.1e-11<br>0.18<br>1.9e-06<br>4.9e-07<br>6.9e-33 | LRR8 (120-180)<br>LRR8 (192-252)<br>LRR4 (313-365)<br>LRR8 (367-428)<br>LRR4 (440-477) | 0.0003<br>9e-05<br>0.14<br>0.00044<br>0.06 |
| 6                                        | LRR XII        | LRRNT2 (47-87)<br>LRR8 (189-249)<br>LRR4 (534-579)<br>Pkinase (727-1027)                             | 6e-12<br>2.5e-07<br>1e-06<br>3.2e-40             | LRR8 (118-177)<br>LRR8 (413-473)<br>LRR4, 2 copies (582-623)                           | 6.7e-05<br>0.025<br>0.00045                |
| 7                                        | LRR XII        | LRR1 (13-34)<br>LRR8 (36-95)<br>Pkinase (202-373)                                                    | 0.22<br>2.5e-10<br>5.1e-31                       |                                                                                        |                                            |
| 8                                        | WAK-Like       | GUB WAK bind (46-157)<br>EGF-CA (312-352)<br>Pkinase (439-709)                                       | 7.2e-28<br>4e-07<br>1.5e-51                      | EGF3 (272-305)                                                                         | 0.054                                      |
| 9                                        | LRR X-BRII     | LRR8 (120-178)                                                                                       | 4.5e-07                                          | LRR6 (1-24)<br>Pkinase (318-355)                                                       | 0.099<br>0.011                             |
| 10                                       | LRR X-BRL      | LRR4 (178-225)<br>Pkinase 406-689                                                                    | 9.3e-07<br>1.6e-43                               | LRR4 (14-61)<br>LRR4 (62-106)<br>PgaD (312-379)                                        | 4.5e-05<br>2.8e-06<br>0.012                |

<sup>a</sup>: domain names

Pkinase: Protein kinase

Malectin like: Carbohydrate-binding protein of the endoplasmic reticulum

LRR: Leucine rich repeat

LRRNT: Leucine rich repeat N-terminal

GUB WAK bind: Wall-associated receptor kinase galacturonan-binding

EGF-CA: Calcium-binding epidermal growth factor

EGF3: Epidermal growth factor

SKG6: Transmembrane alpha-helix
