# Supplementary material for: Kinase domain-targeted isolation of defense-related receptor-like kinases (RLK/Pelle) in Platanus × acerifolia: phylogenetic and structural analysis
Source: PubMed Central journal article supplement (PMC4295470; doi:10.1186/1756-0500-7-884), 2014-12-08
Supplement: 13104_2014_3456_MOESM7_ESM.pdf [file 13104_2014_3456_MOESM7_ESM.pdf]

**Additional file 7. The CrRLK1L-L of *Platanus × acerifolia* (*Pac*).** Neighbor-joining analysis to compare CrRLK1L-L of *Pac* (pac, ♦), with the complete CrRLK1L subfamily of *Arabidopsis* and rice; Pto and paralogs of *Solanum pimpinellifolium* were also included (red rhombus); The subdivision into CRPK1-like 1 and CRPK1-like 2 is from Shiu and Bleecker [4]. aa sequences were used to infer the tree. Analysis was based on the kinase domain region spanning subdomain I through to IX. See caption of Figure 1 for details on the representation of the tree. Arrows indicate *Arabidopsis* CrRLK1L which were functionally characterised.

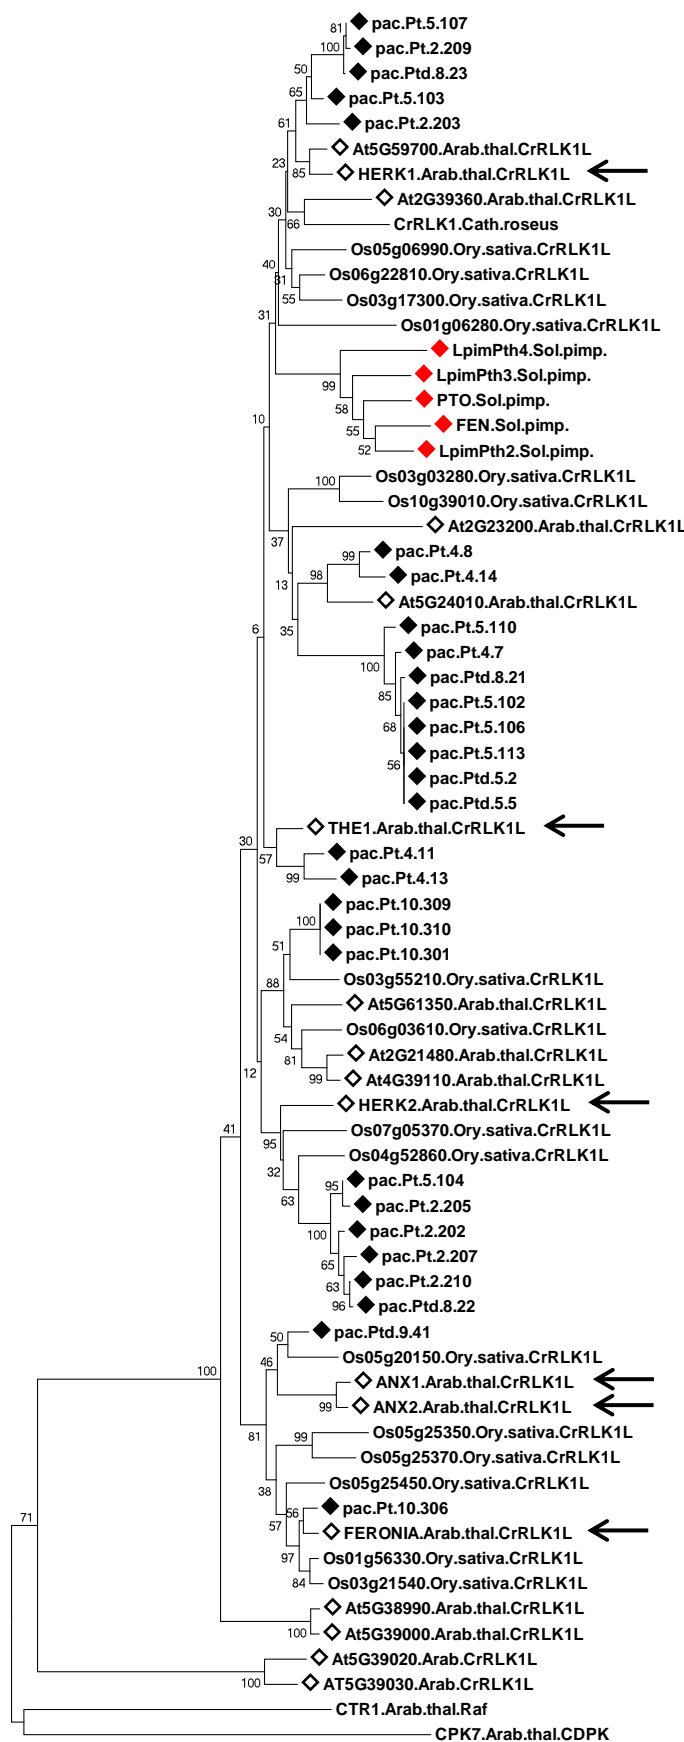

T

CRPK1-like1 (Shiu and Blecker 2003)

CRPK1-like2 (Shiu and Blecker 2003)

0.1
