# Supplementary material for: Kinase domain-targeted isolation of defense-related receptor-like kinases (RLK/Pelle) in Platanus × acerifolia: phylogenetic and structural analysis
Source: PubMed Central journal article supplement (PMC4295470; doi:10.1186/1756-0500-7-884), 2014-12-08

**Additional file 8. Unwanted RLK/Pelles of *Platanus × acerifolia* (*Pac*).** Sequences were obtained with primers aimed at isolating members of LRR XII subfamily. **A** Neighbor-joining tree based on the aa sequences of *Pac* (pac, ♦), the nearest RLK/Pelle members of *Arabidopsis* (◇) and other unknown, homologous sequences of rice and poplar. Analysis was based on the kinase domain region spanning subdomains I/II to the beginning of VIII. See caption of Figure 1 for details on the representation of the tree. **B** Multiple alignment of RD motif (shaded grey), non-RD motif (shaded black) and an atypical variant of the non-RD-Asp (shaded black). **C** Phylogenetic analysis was ambiguous in determining the homology relationship of pac.Erf.2, pac.Erf.9 and pac.Erf.13 with the *Arabidopsis* RLK/Pelle subfamilies GDPD, LRK10L-2, CRPK1-like2 (i.e. CrRLK1L) and Thaumatin. The table thus shows the identity and similarity values and number of gaps derived from the pairwise comparison of these sequences with one *Arabidopsis* relative for each subfamily which, in preliminary analyses, were the nearest sequences.

| Plane tree genes |                            |            |             |             |
|------------------|----------------------------|------------|-------------|-------------|
|                  | Arabidopsis homologs       | aa id. (%) | aa sim. (%) | Gaps (%)    |
| pac.Erf.13       | At1G66910.LRK10L-2         | 61.5       | 74.3        | 3/148 (2.0) |
|                  | • 149 PR5K.Thaumatin       | 58.7       | 73.3        | 4/150 (2.7) |
|                  | • I/II→VIII At1G66980.GDPD | 62.2       | 76.4        | 3/148 (2)   |
|                  | At5G39030.CRPK1-like-2     | 60.1       | 74.3        | 3/148 (2)   |
| pac.Erf.2        | At1G66910.LRK10L-2         | 56.1       | 75.7        | 3/148 (2.0) |
|                  | • 149 PR5K.Thaumatin       | 55.5       | 75.3        | 3/146 (2.1) |
|                  | • I/II→VIII At1G66980.GDPD | 54.1       | 73.6        | 3/148 (2)   |
|                  | At5G39030.CRPK1-like-2     | 54         | 72.7        | 7/150 (4.7) |
| pac.Erf.9        | At1G66910.LRK10L-2         | 55.4       | 75.0        | 3/148 (2.0) |
|                  | • 149 PR5K.Thaumatin       | 54.8       | 74.7        | 3/146 (2.1) |
|                  | • I/II→VIII At1G66980.GDPD | 53.4       | 73          | 3/148 (2.0) |
|                  | At5G39030.CRPK1-like-2     | 51.4       | 70.9        | 3/148 (2.0) |

C

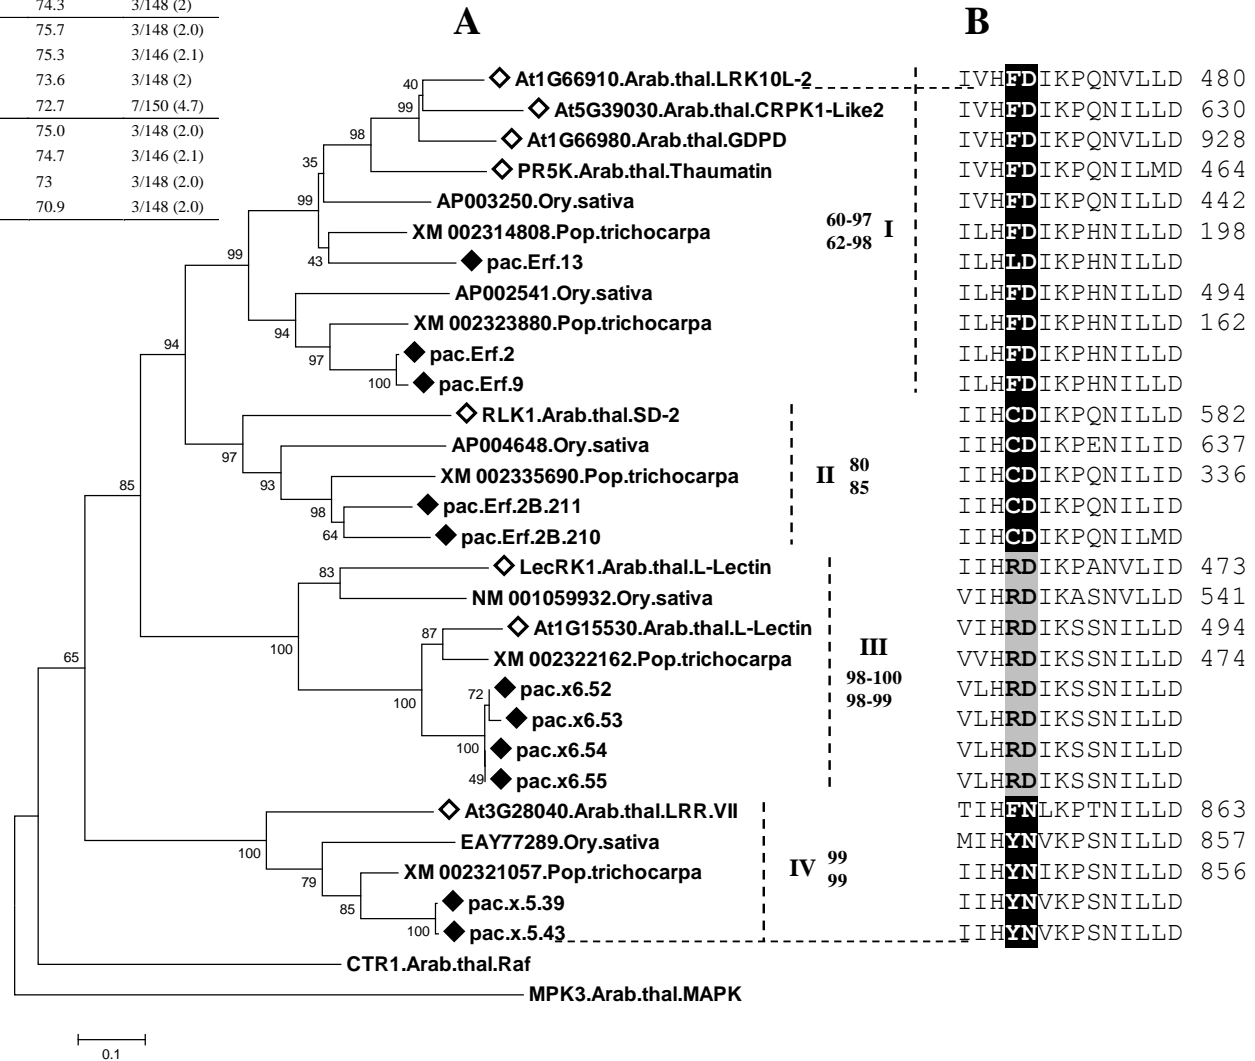

Supplement: 13104_2014_3456_MOESM8_ESM.pdf [file 13104_2014_3456_MOESM8_ESM.pdf]
