# Supplementary material for: Kinase domain-targeted isolation of defense-related receptor-like kinases (RLK/Pelle) in Platanus × acerifolia: phylogenetic and structural analysis
Source: PubMed Central journal article supplement (PMC4295470; doi:10.1186/1756-0500-7-884), 2014-12-08
Supplement: 13104_2014_3456_MOESM9_ESM.pdf [file 13104_2014_3456_MOESM9_ESM.pdf]

**Additional file 9. Wak1-clade-specific amino acid motif helps to identify close homologs in *Platanus × acerifolia* (*Pac*).** Amino acidic residues (shaded black) conserved among sequences of Wak1-headed clade of *Arabidopsis* (RLK/Pelle subfamily WAK-like) and of the II phylogenetic clade of Wak-like-L of *Pac* (refer to phylogeny of Figure 3). This motif suggests a genetic correlation between the two sequence groups.

|                   |                                |                           |             |                        |                      |               |                 |            |           |     |
|-------------------|--------------------------------|---------------------------|-------------|------------------------|----------------------|---------------|-----------------|------------|-----------|-----|
| <b>WAK1 clade</b> | WAK1.Arab.thal.Wak-like        | TVYKGLLPDNS               | 432         | .....GTLFDHLH-G--SMIDS | --SL-TWEHRLK         | 510           | .....LHSSASIPIT | HRDIKTANI  | 540       |     |
|                   | WAK3.Arab.thal.Wak-like        | TVYKGLLPDNT               | 438         | GTLFDHLH-G--SIFDS      | --SL-TWEHRLR         | 516           | LHSSASIPIT      | HRDIKTANI  | 546       |     |
|                   | WAKL16.Arab.thal.Wak-like      | TVYKGLLPDNS               | 131         | GSLFDHLH-G--SMFVS      | --SL-TWEHRLE         | 209           | LHSGASIPIT      | HRDIKTANI  | 239       |     |
|                   | WAK5.Arab.thal.Wak-like        | TVYKGLQDNS                | 431         | GTLFDHLH-G--SMFDS      | --SL-TWEHRLR         | 509           | LHSYASIPIT      | HRDVKTANI  | 539       |     |
|                   | WAK2.Arab.thal.Wak-like        | TVYKGLLPDNS               | 427         | GTLFDHLH-G--SLYDS      | --SL-TWEHRLR         | 505           | LHSSASIPIT      | HRDIKTANI  | 535       |     |
|                   | WAK4.Arab.thal.Wak-like        | TVYKGLLPDNS               | 433         | GTLFDHLH-G--SMFDS      | --SL-TWEHRLR         | 511           | LHSSASIPIT      | HRDIKTANI  | 541       |     |
| <b>II clade</b>   | pac.W.VtA.109                  | TVYKGLLEDHR               |             | GTLFHHIH-D--EGHVS      | --SI-SWESRLR         |               | LHSATSIPIT      | HRDIKSTNI  |           |     |
|                   | pac.W.Ch.156                   | -----ILEDHR               |             | GTLFHHIH-D--EGHVS      | --SI-SWEIRLR         |               | LHSATSTPTI      | NRDIKSTNI  |           |     |
|                   | pac.W.ArA.6                    | TVYKGLADHR                |             | GTLSHHHI-D--ESHIS      | --SI-SWGCRLR         |               | LHSAASPTI       | HRDIKSTNI  |           |     |
|                   | pac.W.ArA.11                   | TVYKGLADHR                |             | GTLSHHHI-D--ESHIS      | --SI-SWGCRLR         |               | LHSAASPTI       | HRDIKSTNI  |           |     |
|                   | pac.W.ArA.3                    | TVYKGLADHR                |             | GTLSHHHI-D--ESHIS      | --SI-SWGCRLR         |               | LHSAASPTI       | HRDIKSTNI  |           |     |
|                   | pac.W.Ch.164                   | -----IADHR                |             | GTLHHHHI-D--ESHIS      | --SI-SWGCRLR         |               | LHSAASPTI       | HRDIKSTNI  |           |     |
|                   | pac.W.ArA.7                    | TVYKGLADHR                |             | GTLFHHIH-D--EGHVS      | --SI-SWGSRMR         |               | LHSAASIPIT      | HRDIKSTNI  |           |     |
|                   | pac.W.ArA.14                   | TVYKGLADHR                |             | GTLFHHIH-D--EGHVS      | --SI-SWEIRLR         |               | LHSAVSTPTI      | HRDIKSANI  |           |     |
| <b>RFO1 clade</b> | WAKL9.Arab.thal.Wak-like       | TVYKGLVDGR                | 470         | GNLFEHLH-D--EFDEN      | --IMATWNI            | 549           | LHSSASSPIY      | HRDVKSTNI  | 579       |     |
|                   | WAKL10.Arab.thal.Wak-like      | TVYKGLVDGR                | 456         | GNLFEHLH-D--DSDDY      | --TMTTWEVRLR         | 535           | LHSAASSPIY      | HRDIKSTNI  | 565       |     |
|                   | WAKL1.Arab.thal.Wak-like       | TVYKGLVDGS                | 452         | GDLFKRLH-D--ESDDY      | --TM-TWEVRLR         | 530           | MHSAASPTI       | HRDIKSTNI  | 560       |     |
|                   | WAKL5.Arab.thal.Wak-like       | TVYKGLVDGK                | 435         | GDMFKRLH-D--ESDDY      | --AM-TWEVRLR         | 513           | MHSAASPTI       | HRDIKSTNI  | 543       |     |
|                   | WAKL6.Arab.thal.Wak-like       | TVYKGLAEGR                | 455         | GDLFKRLH-EKSESN        | --TM-TWEVRLR         | 535           | MHSAASPTI       | HRDIKSTNI  | 565       |     |
|                   | WAKL2.Arab.thal.Wak-like       | TVYKGLVDGR                | 439         | GDLCKRLH-D--ESDDY      | --TM-TWEVRLH         | 517           | LHSAASPTI       | HRDIKSTNI  | 547       |     |
|                   | WAKL4.Arab.thal.Wak-like       | TVYKGLVDGR                | 465         | GDLCKRLH-D--ECDDY      | --IM-TWEVRLH         | 543           | LHSAASPTI       | HRDIKSTNI  | 573       |     |
|                   | RFO1.WAKL22.Arab.thal.Wak-like | TVYKGLVDGR                | 444         | GDLFKRLH-H--DSDDY      | --TM-TWDVRLR         | 522           | LHSAASPTI       | HRDVKSTNI  | 552       |     |
|                   | WAKL8.Arab.thal.Wak-like       | TVYKGLDGM                 | 413         | RNLFDHLH-N--PSEDF      | --PM-SWEVRLC         | 491           | LHSAASPTI       | HRDVKSTNI  | 521       |     |
|                   | WAKL17.Arab.thal.Wak-like      | TVYKGLVDGR                | 467         | GNLFKHIHEE--EADDY      | --TM-IWGMRLR         | 546           | LHSAASPTI       | HRDIKSTNI  | 576       |     |
|                   | WAKL18.Arab.thal.Wak-like      | TVYKGLVDGR                | 476         | GNLFKHIHEE--ESDDY      | --TM-LWGMRLR         | 555           | LHSAASPTI       | HRDIKSTNI  | 585       |     |
|                   | WAKL11.Arab.thal.Wak-like      | TVYKGLVDGR                | 474         | GNLFQHLH-E--ESDDY      | --TK-TWGMRLR         | 552           | LHSAASPTI       | HRDIKSTNI  | 582       |     |
|                   | WAKL13.Arab.thal.Wak-like      | TVYKGLVDGR                | 477         | GNLFQHLH-E--EFDY       | --TA-LWGVMR          | 555           | LHTAACSPIY      | HRDIKSTNI  | 585       |     |
| <b>I clade</b>    | pac.W.VtA.107                  | TVYKGLHCGR                |             | GTLFYHHI-D--QSEEF      | --PI-SWVNCLR         |               | LHSAASPTI       | HRDIKSTNI  |           |     |
|                   | pac.W.VtB.203                  | TVYKGLHCGR                |             | GTLFHHIH-S--QTEDF      | --LM-SWDNRLR         |               | LHSSVSMPIY      | HRDVKSTNI  |           |     |
|                   | pac.W.VtB.208                  | TVYKGLHCGR                |             | GTLFHHIH-S--QTEDF      | --LM-SWDNRLR         |               | LHSSASPTI       | HRDIKSTNI  |           |     |
|                   | pac.W.VtB.201                  | TVYKGLQDGR                |             | GTLFYHHI-D--PTEEF      | --VM-SWDNRLR         |               | LHSAASPTI       | HRDVKSTNI  |           |     |
|                   | pac.W.VtA.108                  | TVYKGLQDGR                |             | GTLFYHHI-D--QSEEF      | --PI-SWVNCLR         |               | LHSAASPTI       | HRDIKSTNI  |           |     |
|                   | pac.W.VtA.101                  | TVYKGLVDGM                |             | GTLFHYIH-D--QSEEF      | --PN-SWDNRLK         |               | LHSAASPTI       | HRDIKSSNI  |           |     |
|                   | pac.W.VtA.105                  | TVYKGLVDGM                |             | GTLFHYIH-D--QSEEF      | --PN-SWDNRLK         |               | LHSAASPTI       | HRDIKSSNI  |           |     |
|                   | pac.W.VtA.102                  | TVYKGLVDGT                |             | GTLFHYIH-D--QSEEF      | --PN-SWDNRLK         |               | LHSAASPTI       | HRDIKSSNI  |           |     |
|                   | pac.W.Ch.157                   | -----MLVDGT               |             | GTLFHYIH-D--QSEEF      | --PN-SWDNRLK         |               | LHSAASPTI       | HRDIKSSNI  |           |     |
|                   | pac.W.ArA.8                    | TVYKGLPDGR                |             | GTLFYHHI-E--KSEEF      | --LS-SWDNRLR         |               | LHSAASPTI       | HRDIKSTNI  |           |     |
|                   | pac.W.VtA.113                  | TVYKGLVDGM                |             | GTLFHHIH-E--KSEEF      | --LS-SWDNRLR         |               | LHSAASPTI       | HRDIKSTNI  |           |     |
|                   | pac.W.Ch.158                   | -----MLLDGR               |             | GTLFHHIH-D--QSEEF      | --QC-SWDNRLR         |               | LHSAASPTI       | HRDIKSTNI  |           |     |
|                   | pac.W.Ch.160                   | -----MLLDGR               |             | GTLFHHIH-D--QSEEF      | --QC-SWDNRLR         |               | LHSAASPTI       | HRDIKSTNI  |           |     |
|                   | pac.W.VtA.110                  | TVYKGLLDGR                |             | GTLFHHIH-D--QSEEF      | --QC-SWDNRLR         |               | LHSAASPTI       | HRDIKSTNI  |           |     |
|                   | pac.W.ArA.9                    | TVYKGLPDGR                |             | GTLFHHIH-V--QSEEF      | --QC-SWDNRLR         |               | LHSAASPTI       | HRDIKSTNI  |           |     |
|                   | pac.W.VtB.209                  | TVYKGLVNGR                |             | GTLFHHIH-D--QSEEF      | --LS-SWDNRLR         |               | LHSTASPTI       | HRDIKSTNI  |           |     |
|                   | pac.W.Ch.152                   | -----MLGDGR               |             | GTLFHHIH-D--QSEEF      | --LS-SWDNRLR         |               | LHSSASPTI       | YHKDIKSTNI |           |     |
|                   | pac.W.Ch.162                   | -----VLSGDR               |             | GTLAHHIH-E--LGLRS      | --SL-GWGDRLK         |               | MHSCK---        | HRDIKSTNI  |           |     |
|                   | <b>III clade</b>               | WAKL15.Arab.thal.Wak-like | EVFKGNLDDGT | 377                    | GTLFEHIYGGGGGGGLYDHL | --PLRRRLM     | 460             | LHSSSPPIY  | HRDVKSSNI | 490 |
|                   |                                | WAKL20.Arab.thal.Wak-like | EVFKAVLEDGT | 386                    | GTLFEHLH--GSSDR      | TKWPL-TWRRRLQ | 466             | LHSAASPTI  | HRDVKSSNI | 496 |
| <b>IV clade</b>   | pac.W.ArB.305                  | TVYAGKLNVD                |             | GTLSQLQ-R--EIST        | ---GL-PWMTRLT        |               | LHSAINPTI       | FHRDIKSSNI |           |     |
|                   | pac.W.ArB.312                  | TVYAGKLNVD                |             | GTLSQLQ-R--EIST        | ---GL-PWMTRLT        |               | LHSAINPTI       | FHRDIKSSNI |           |     |
|                   | WAKL14.Arab.thal.Wak-like      | TVYRGLQND                 | 371         | GTLSEHLQ-R--DRGS       | ---GL-PWTLRLT        | 448           | LHSSMNPPIY      | HRDIKSTNI  | 478       |     |
|                   | WAKL21.Arab.thal.Wak-like      | TVYAGEFPNS                | 337         | GTLYQHLQ-H--ERQ        | QP--PL-SWQLRLA       | 415           | LHSSVNPTI       | HRDIKSSNI  | 445       |     |
