# Supplementary material for: Kinase domain-targeted isolation of defense-related receptor-like kinases (RLK/Pelle) in Platanus × acerifolia: phylogenetic and structural analysis
Source: PubMed Central journal article supplement (PMC4295470; doi:10.1186/1756-0500-7-884), 2014-12-08

**Additional file 10. Classification of *Pac* sequences based on maximum-likelihood (ML) phylogenetic analyses.** Analyses were performed on the same dataset alignments used for crucial Neighbor-joining trees presented in this work (aa sequences). A1 and A2 match with Additional file 6B (all *Pac* sequences compared with homologous *Arabidopsis* RLK Pelles); B matches with Additional file 7 (*Arabidopsis* and rice CrRLK1L vs *Pac* CrRLK1L-L); C matches with Fig. 2 (*Arabidopsis* LRR XII vs *Pac* LRR XII-L); D matches with Fig. 3 (*Arabidopsis* WAK-like vs *Pac* WAK-like-L); E with Fig. 4 (*Arabidopsis* LRR X vs *Pac* LRR X-BRI1-L group). Editing matches that of counterpart figures.

All trees were inferred with Mega 6 except the one represented in A2 that was TREE PUZZLE-implemented. With regard to Mega 6 analyses, the percentage of trees in which the associated sequences clustered together in the bootstrap test (1,000 replicates) is shown for each node; trees are drawn to scale in the number of substitutions per site (scale at the bottom). TREE-PUZZLE analysis was conducted with 50,000 puzzling steps and quartet puzzling support values are shown for each node.

A1

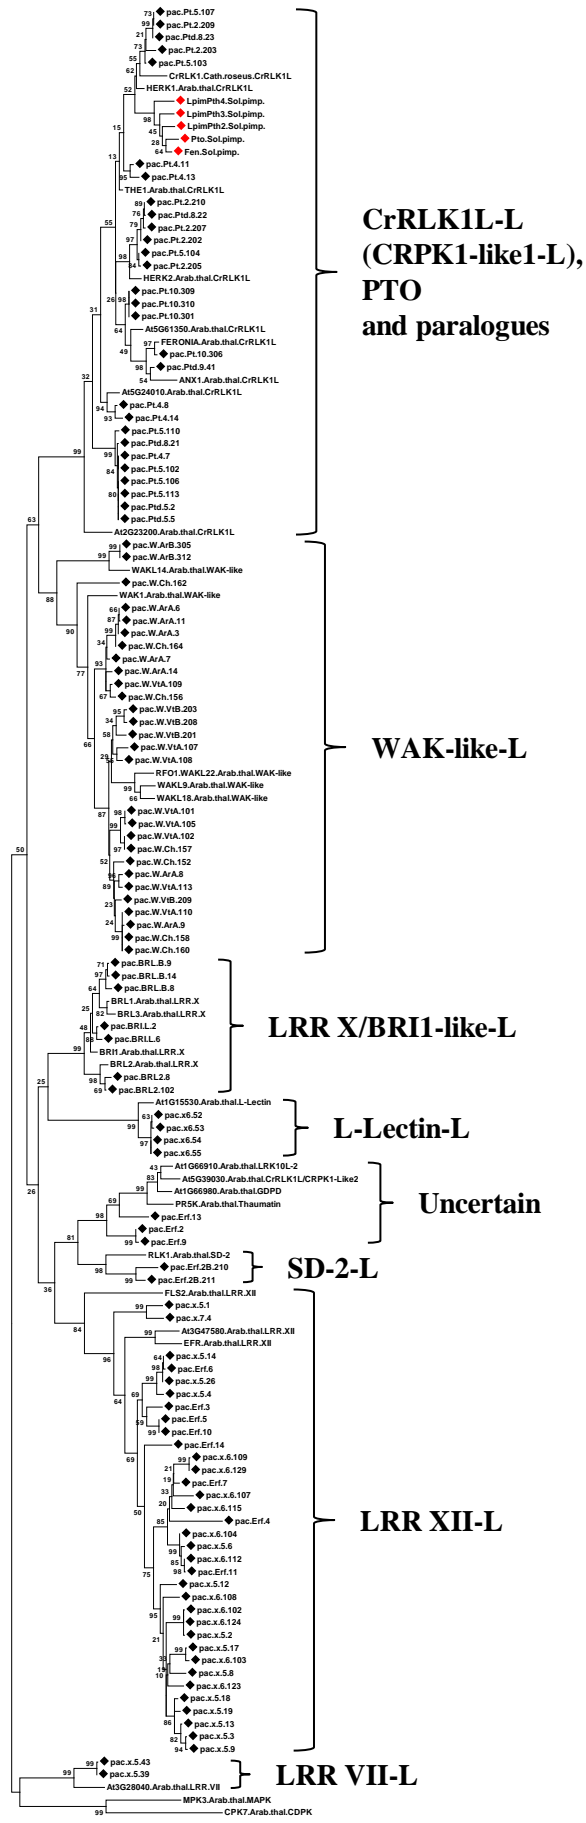

A2

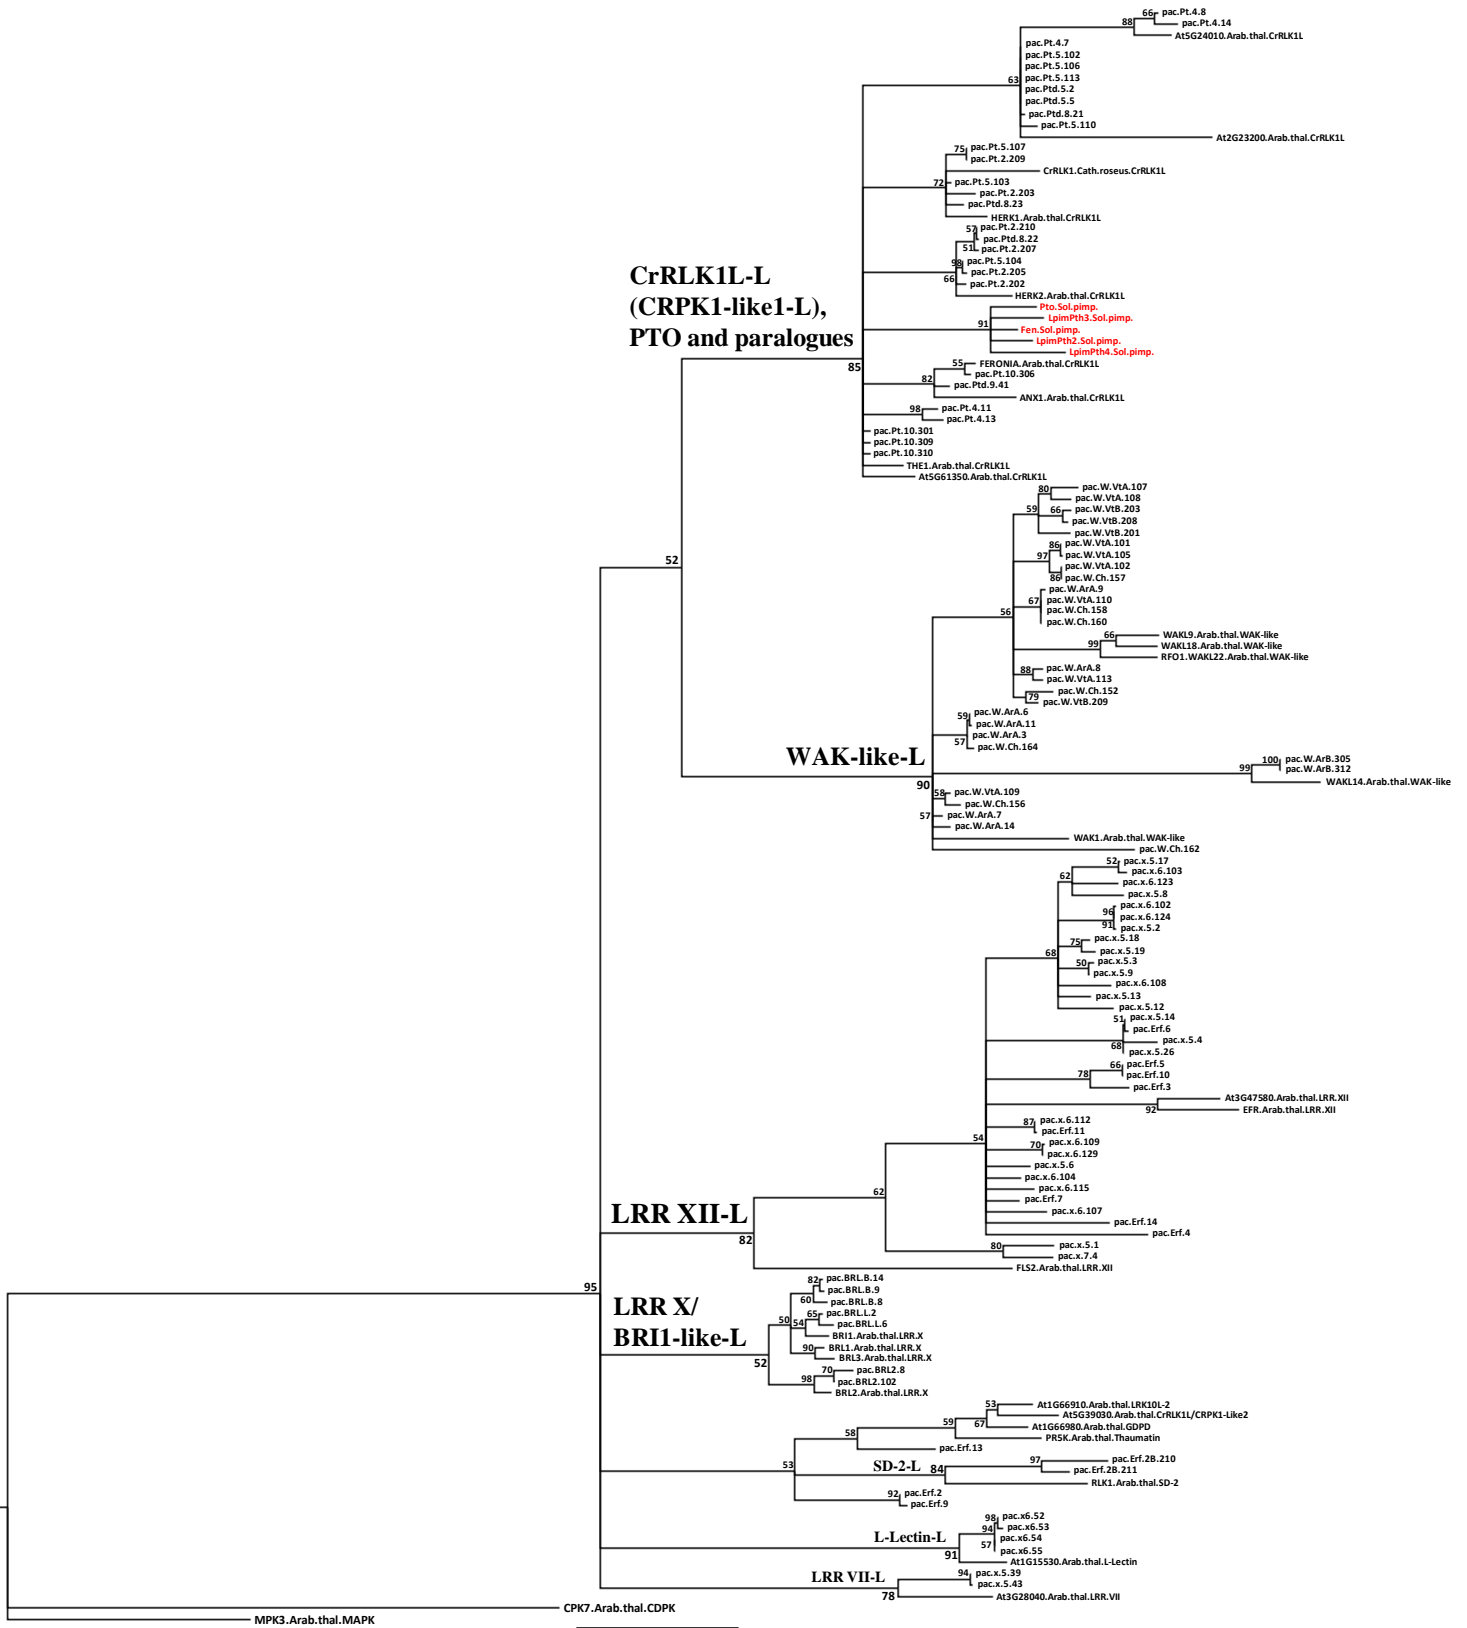

**B**

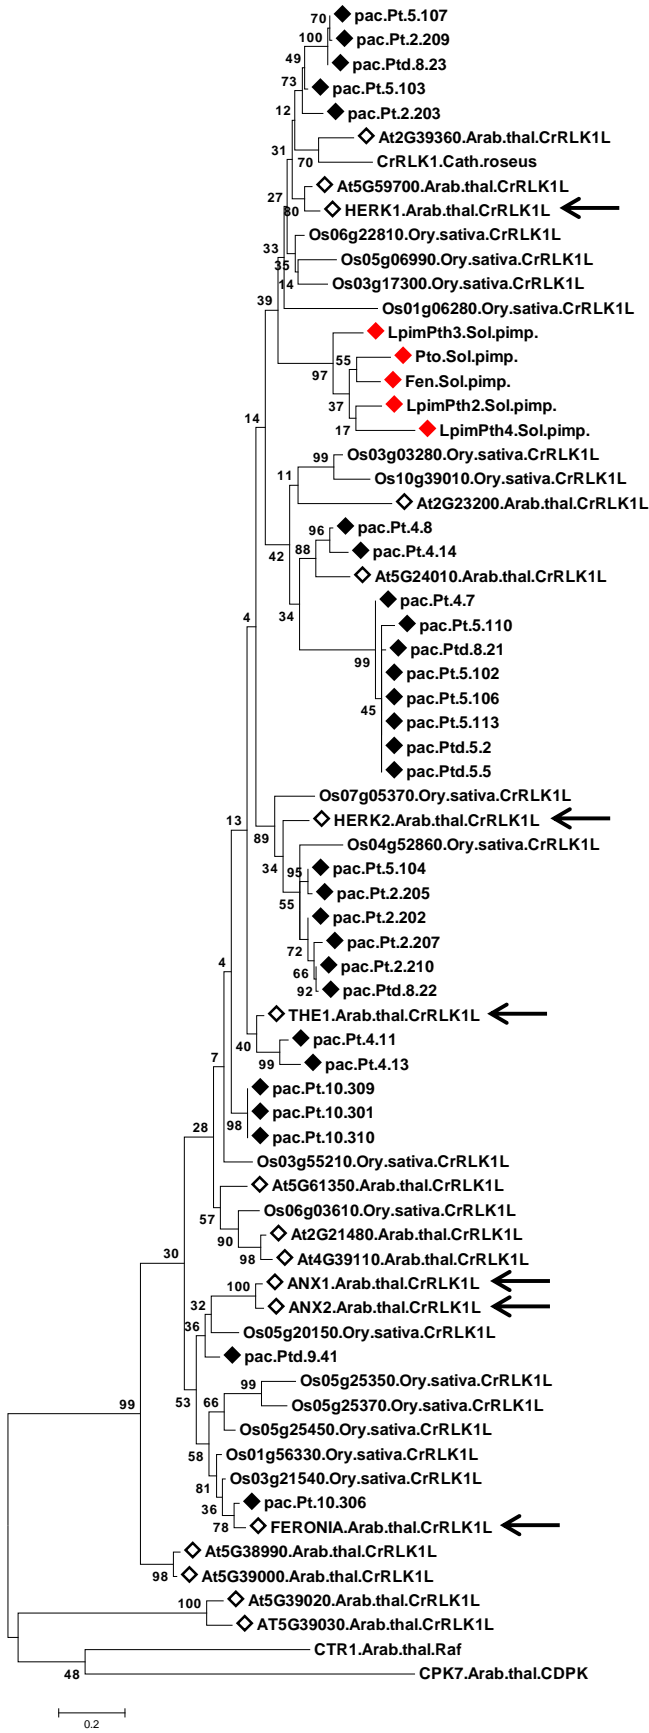

**T**

**CRPK1-like1 (Shiu and Bleecker 2003)**

**CRPK1-like2 (Shiu and Bleecker 2003)**

C

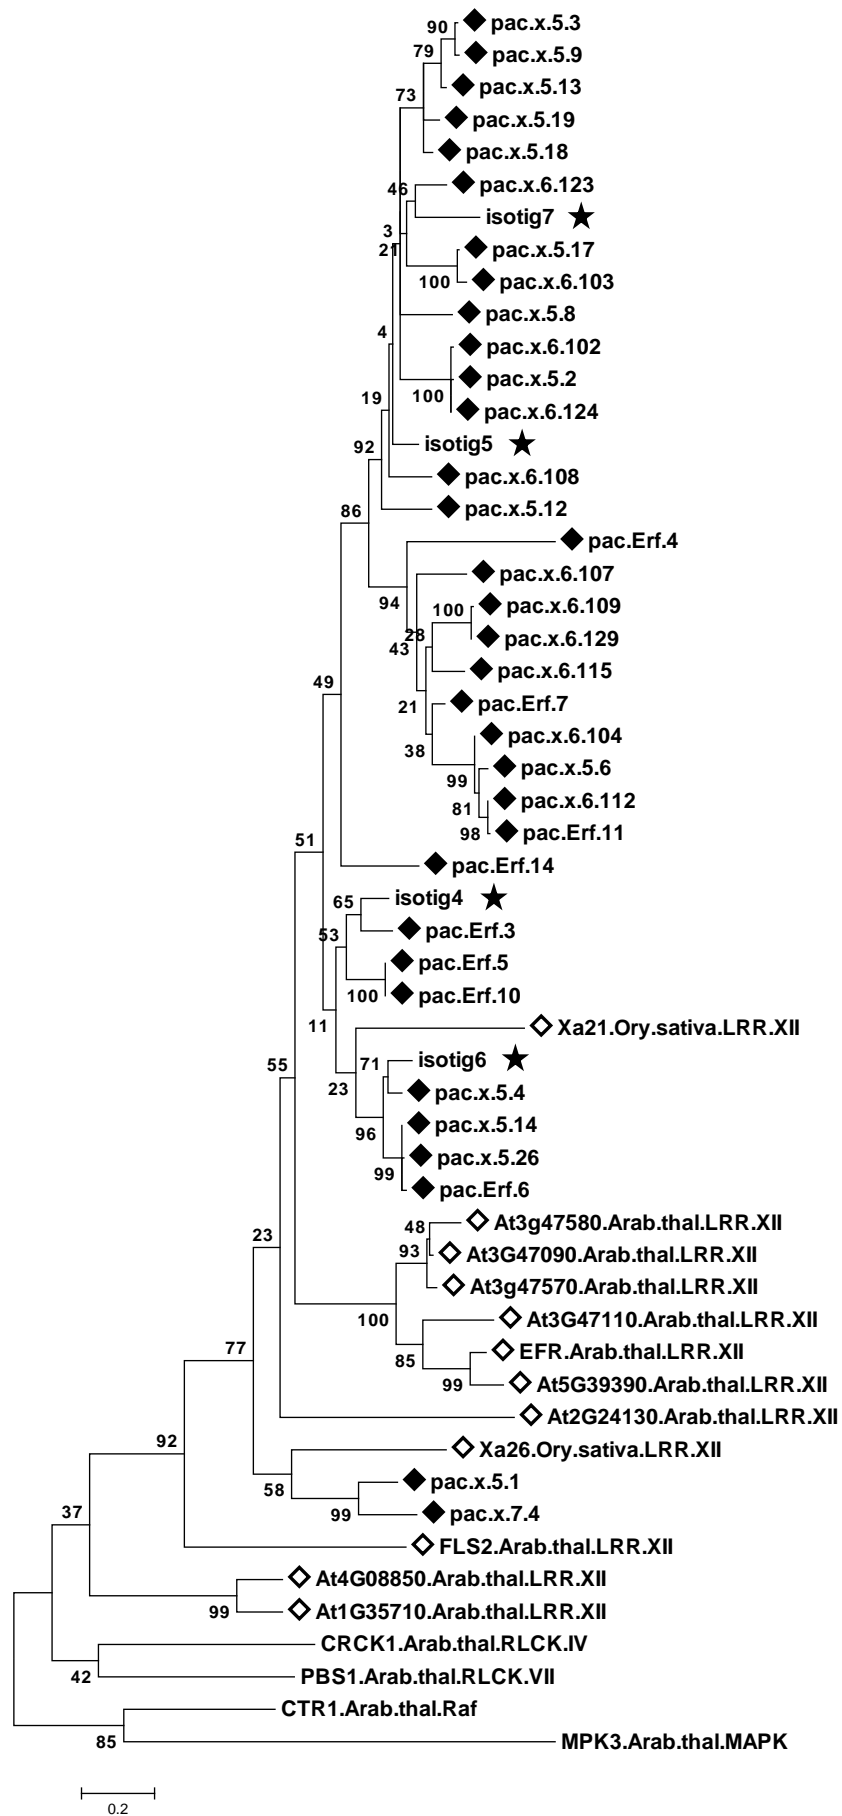

D

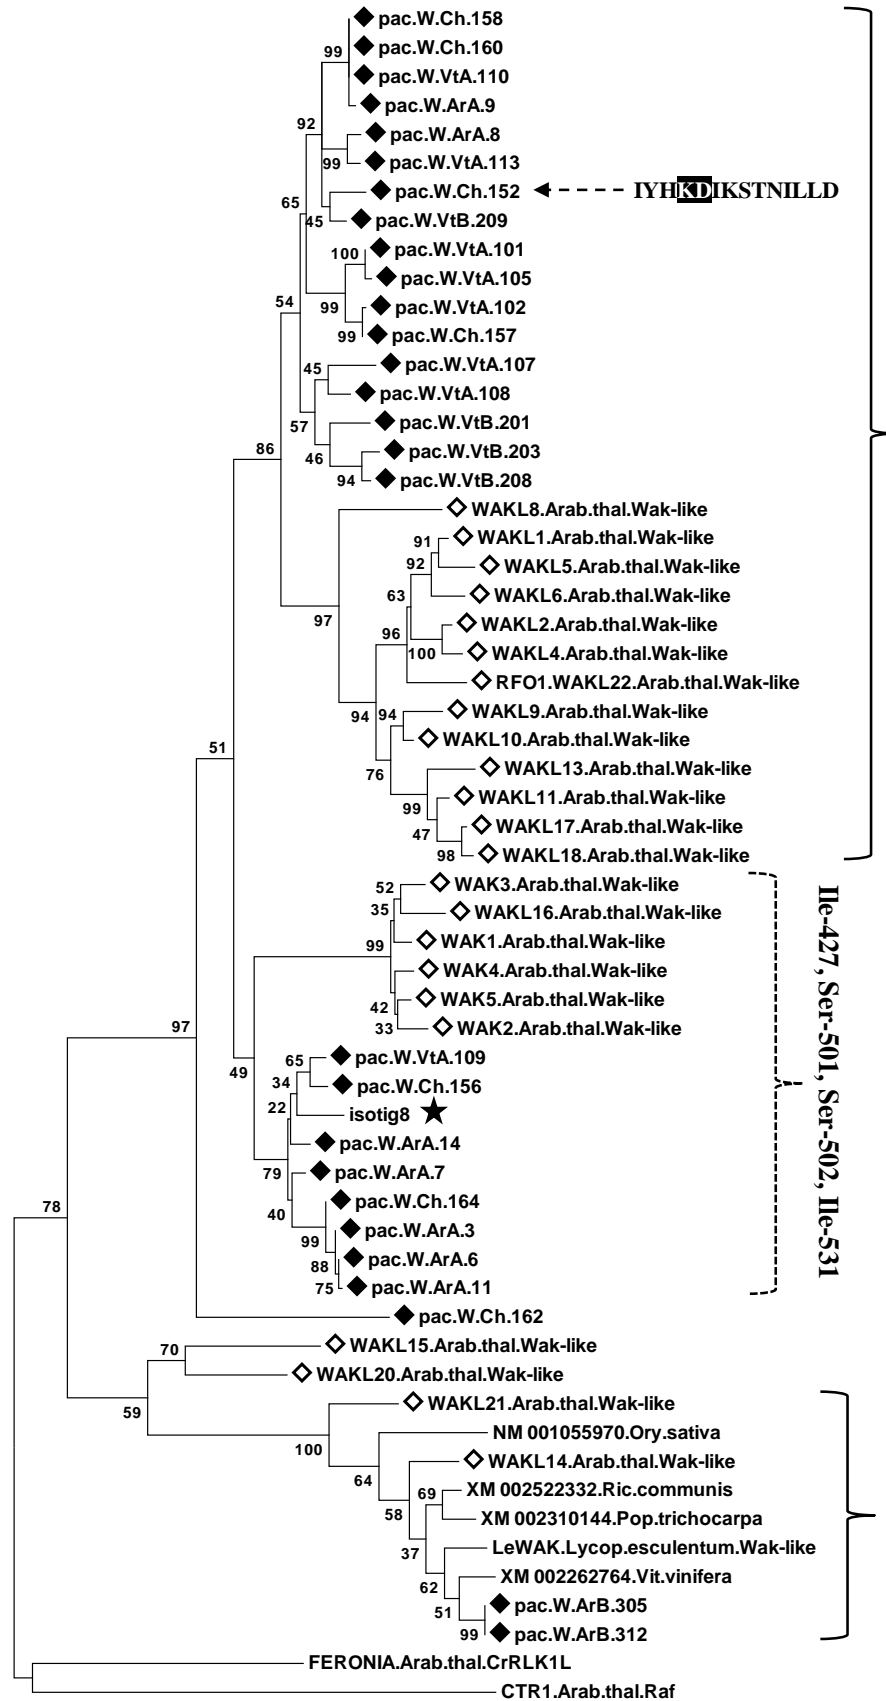

0.1

**E**

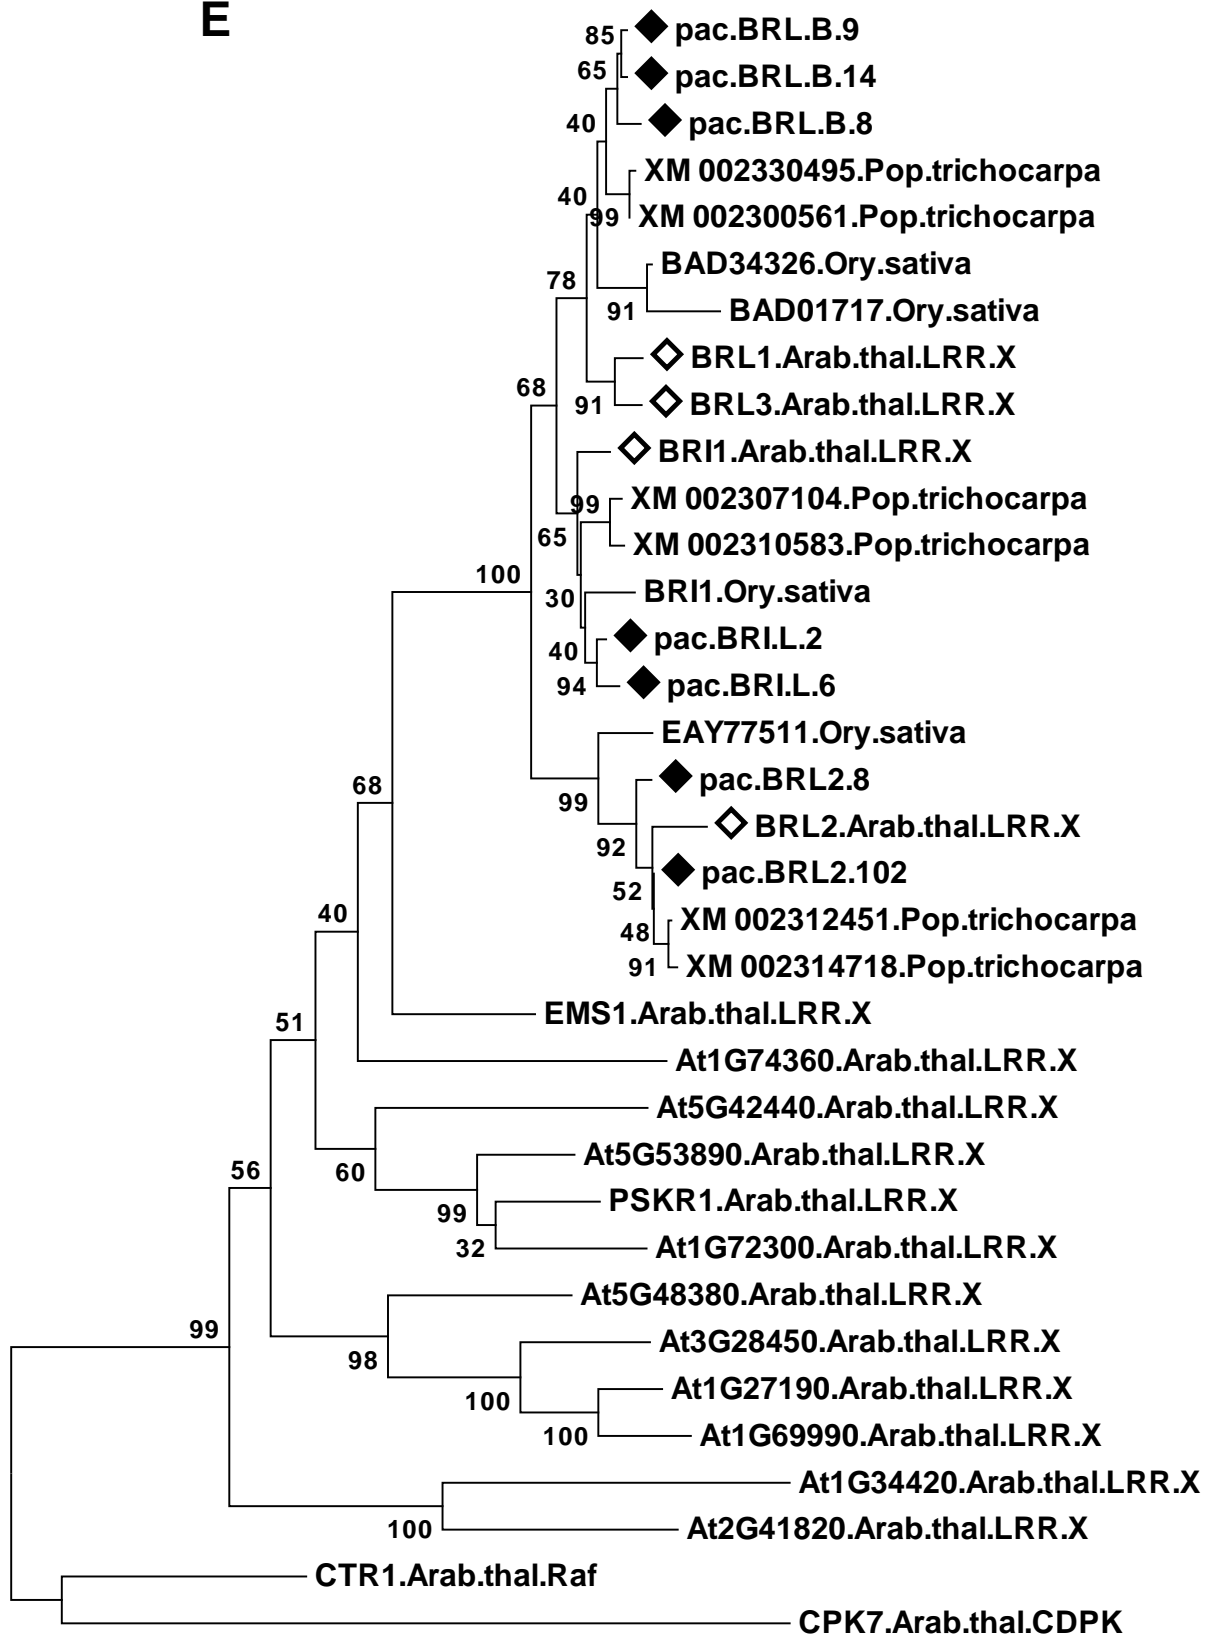

Supplement: 13104_2014_3456_MOESM10_ESM.pdf [file 13104_2014_3456_MOESM10_ESM.pdf]
