# Supplementary material for: Kinase domain-targeted isolation of defense-related receptor-like kinases (RLK/Pelle) in Platanus × acerifolia: phylogenetic and structural analysis
Source: PubMed Central journal article supplement (PMC4295470; doi:10.1186/1756-0500-7-884), 2014-12-08
Supplement: 13104_2014_3456_MOESM14_ESM.pdf [file 13104_2014_3456_MOESM14_ESM.pdf]

**Additional file 14. Serine, threonine and tyrosine phosphorylation specificity motifs of RLK/Pelles of *Platanus × acerifolia* (*Pac*) and *Arabidopsis*.** The motifs are compared with phosphorylation specificity motifs of protein kinase previously inferred [42]. Consensus was determined using MEME (a motif-based sequence analysis tool).

| Phosphorylation specificity | Subdom. VI B                                                          | Subdom. VIII<br>P+1 loop                                                      |           |
|-----------------------------|-----------------------------------------------------------------------|-------------------------------------------------------------------------------|-----------|
| Ser/Thr                     | DLKXXN                                                                | $\begin{matrix} S & F \\ \vdots & \vdots \\ G T X X Y X A P E \end{matrix}$   |           |
| Ser/Thr/Tyr                 | DLKSDN                                                                | GTYRWMAPE                                                                     |           |
| Tyr                         | $\begin{matrix} A & R \\ \vdots & \vdots \\ D L R A A N \end{matrix}$ | $\begin{matrix} V R & M \\ \vdots & \vdots \\ X P I K W T A P E \end{matrix}$ |           |
| <i>Pac</i>                  |                                                                       |                                                                               | CRLKIL    |
| <i>Arabidopsis</i>          |                                                                       |                                                                               |           |
| <i>Pac</i>                  |                                                                       |                                                                               | WAK-like  |
| <i>Arabidopsis</i>          |                                                                       |                                                                               |           |
| <i>Pac</i>                  |                                                                       |                                                                               | BRI1-like |
| <i>Arabidopsis</i>          |                                                                       |                                                                               |           |
| <i>Pac</i>                  |                                                                       | NA                                                                            | LRR XII   |
| <i>Arabidopsis</i>          |                                                                       |                                                                               |           |
