# Supplementary material for: Kinase domain-targeted isolation of defense-related receptor-like kinases (RLK/Pelle) in Platanus × acerifolia: phylogenetic and structural analysis
Source: PubMed Central journal article supplement (PMC4295470; doi:10.1186/1756-0500-7-884), 2014-12-08
Supplement: 13104_2014_3456_MOESM15_ESM.pdf [file 13104_2014_3456_MOESM15_ESM.pdf]

**Additional file 15. Crucial residues of the activation segments of Pto and BRI1.** The relevant literature is cited in the text.

| Pto residues <sup>a</sup><br>Functions        | T190 | T195  | S198  | T199  | V201  | K202 | G203 | T204  | L205 | G206 | Y207  | I208 | D209 | Y212  | F213 | I214 | K215 |
|-----------------------------------------------|------|-------|-------|-------|-------|------|------|-------|------|------|-------|------|------|-------|------|------|------|
| Pto/avrPto interaction                        |      |       |       | +     |       | +    |      | +     | +    |      | +     |      | +    |       |      |      |      |
| Pto/avrPtoB interaction                       |      |       |       | +     |       |      |      |       | +    |      |       |      |      |       | +    |      | +    |
| Elicitation of hypersensitive response        |      |       | +     | +     |       |      |      |       |      |      |       |      |      |       |      |      |      |
| Negative regulator of the resistance response | +    | +     |       | +     | +     |      | +    | +     | +    | +    | +     | +    |      |       |      |      |      |
| Autophosphorilation site                      |      |       | +     | +     |       |      |      |       |      |      |       |      |      |       |      |      |      |
| BRI1 residues <sup>a</sup><br>Functions       |      | T1039 | S1042 | S1044 | T1045 |      |      | T1049 |      |      | Y1052 |      |      | Y1057 |      |      |      |
| Auto/trans phosphorilation                    |      | +     | +     | +     | +     |      |      | +     |      |      |       |      |      |       |      |      |      |
| Required for BRI1 signalling                  |      | +     | +     | +     | +     |      |      | +     |      |      |       |      |      |       |      |      |      |
| Essential for kinase activity                 |      |       |       |       |       |      |      |       |      |      | +     |      |      | +     |      |      |      |

<sup>a</sup> Residues of Pto and BRI1 which have corresponding positions in the activation segment are reported in the same columns.
