# Supplementary material for: Kinase domain-targeted isolation of defense-related receptor-like kinases (RLK/Pelle) in Platanus × acerifolia: phylogenetic and structural analysis
Source: PubMed Central journal article supplement (PMC4295470; doi:10.1186/1756-0500-7-884), 2014-12-08

**Additional file 17. Important residues of Wak-like located in the kinase domain region spanning subdomains VIB to VIII.** The alignment shows the functional consensus derived from the Pto and BRI1 activation segment (subdomains VII and VIII) (Figure 6, Additional file 15) and its conservation in the WAK-like(-L) subfamilies of *Arabidopsis* and *Platanus × acerifolia* (*Pac*). Black-shaded residues define the Pto functional consensus and the identities with WAK-like(-L). BRI1 consensus residues shared with Pto consensus motif, are shaded black, the residue exclusive of BRI1 consensus is shaded grey. Shaded-grey gaps have been inserted in order to match sequences with BRI1 consensus. The figure also shows the RD and non-RD motif and the regions that are useful to infer the ser/thr, tyr and the dual phosphorylation specificities of protein kinases [42] (Additional file 14) [red-shaded residues (subdomain VIb) and the P+1 loop (subdomain VIII)].

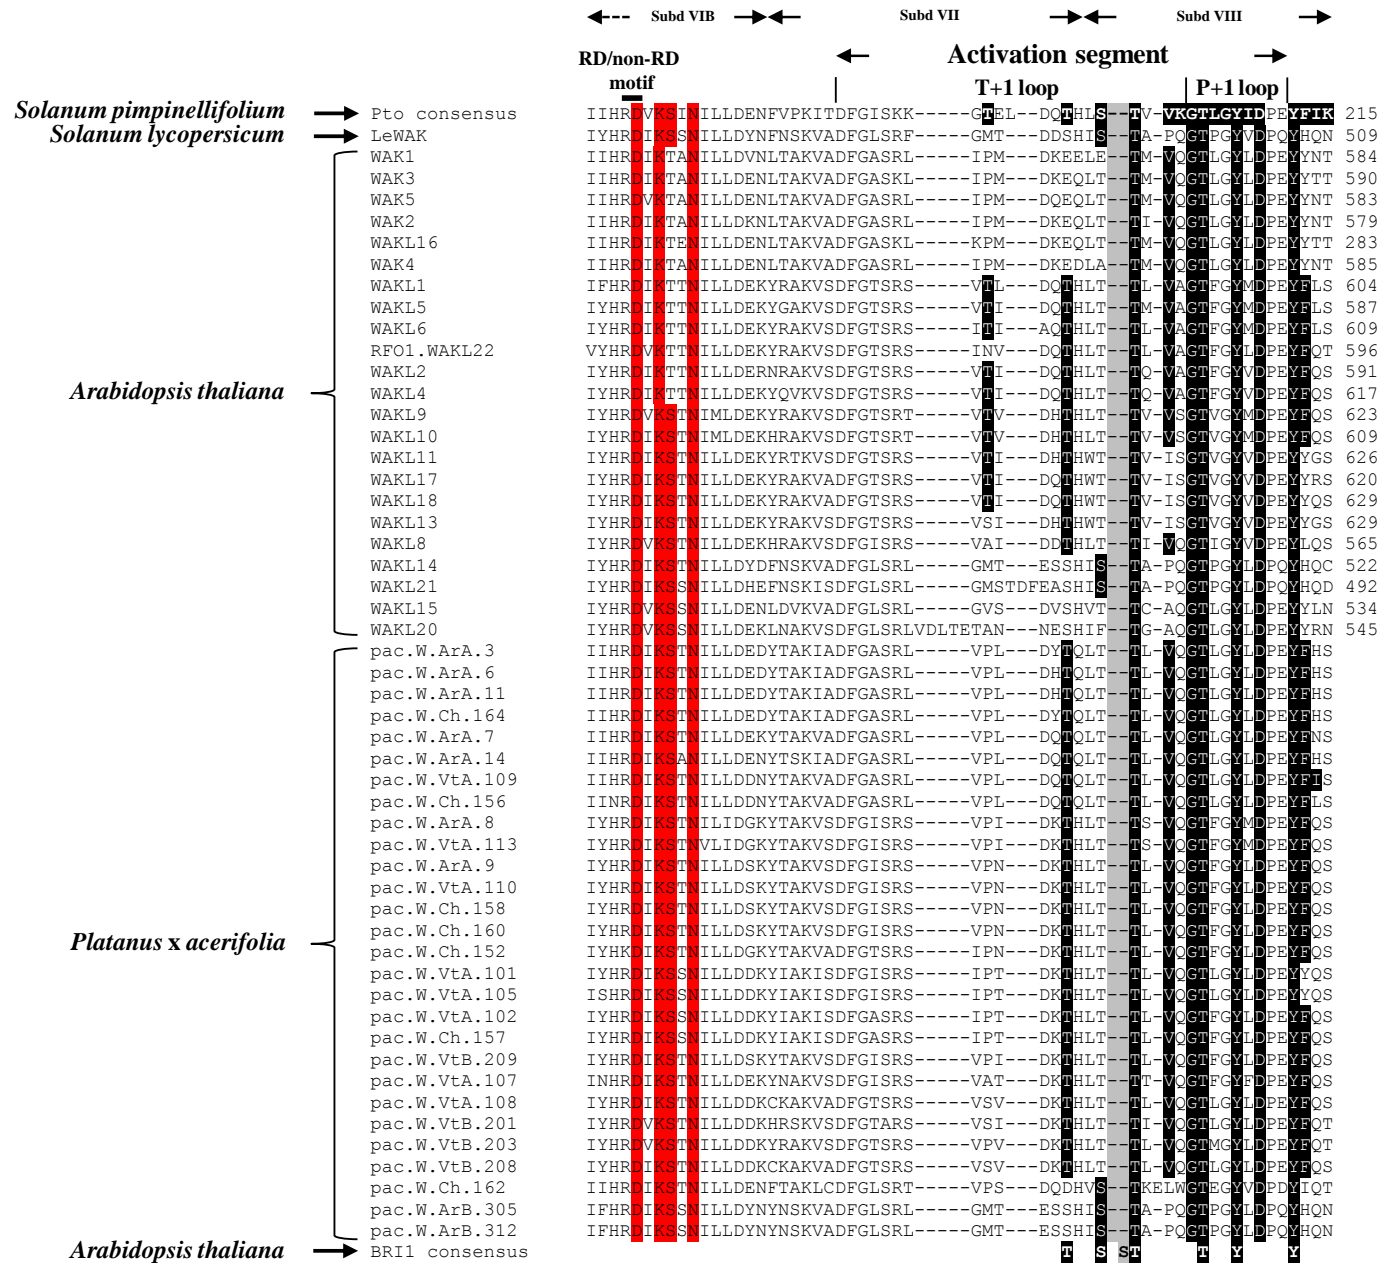

Supplement: 13104_2014_3456_MOESM17_ESM.pdf [file 13104_2014_3456_MOESM17_ESM.pdf]
