# Supplementary material for: Kinase domain-targeted isolation of defense-related receptor-like kinases (RLK/Pelle) in Platanus × acerifolia: phylogenetic and structural analysis
Source: PubMed Central journal article supplement (PMC4295470; doi:10.1186/1756-0500-7-884), 2014-12-08
Supplement: 13104_2014_3456_MOESM18_ESM.pdf [file 13104_2014_3456_MOESM18_ESM.pdf]

**Additional file 18. Important residues of LRR X-BRI1 group located in the kinase domain region spanning subdomains VIB to VIII.** The alignment shows the functional consensus derived from the Pto and BRI1 activation segment (subdomains VII and VIII) (Figure 6, Additional file 15) and its conservation in the LRR X-BRI1(-L) group of *Arabidopsis* and *Platanus × acerifolia* (*Pac*). Black-shaded residues define the Pto functional consensus and the identities with LRR X-BRI1(-L). BRI1 consensus residues shared with Pto consensus motif, are shaded black, the residue exclusive of BRI1 consensus is shaded grey. The figure also shows the RD motif and the regions that are useful to infer the ser/thr, tyr and the dual phosphorylation specificities of protein kinases [42] (Additional file 14) [red-shaded residues (subdomain VIb) and the P+1 loop (subdomain VIII)].
