# Supplementary material for: Kinase domain-targeted isolation of defense-related receptor-like kinases (RLK/Pelle) in Platanus × acerifolia: phylogenetic and structural analysis
Source: PubMed Central journal article supplement (PMC4295470; doi:10.1186/1756-0500-7-884), 2014-12-08
Supplement: 13104_2014_3456_MOESM19_ESM.pdf [file 13104_2014_3456_MOESM19_ESM.pdf]

**Additional file 19. Ka/Ks values obtained for each window in the sliding window analysis of *Platanus × acerifolia* (Pac) LRR XII-L. CrRLK1L-L of Pac and LRR XII of *Arabidopsis* are included for comparison.**

| Sequence Groups <sup>a</sup> | <i>Pac</i> I LRR XII-L |           |            | <i>Pac</i> II LRR XII-L |           |            | <i>Pac</i> IV+V LRR XII-L |           |            | <i>Arabidopsis</i> <sup>b</sup> LRR XII |           |            | <i>Pac</i> CrRLK1L-L |           |            |
|------------------------------|------------------------|-----------|------------|-------------------------|-----------|------------|---------------------------|-----------|------------|-----------------------------------------|-----------|------------|----------------------|-----------|------------|
|                              | Mean                   | count > 1 | max. value | Mean                    | count > 1 | max. value | Mean                      | count > 1 | max. value | Mean                                    | count > 1 | max. value | Mean                 | count > 1 | max. value |
| 1                            | 0.50                   | 8         | 1.36       | 0.96                    | 15        | 1.9        | 0.56                      | 4         | 1.08       | 0.17                                    | 0         | 0.57       | 0.04                 | 0         | 0.49       |
| 2                            | 0.39                   | 6         | 1.92       | 0.66                    | 5         | 1.26       | 0.22                      | 0         | 0.51       | 0.12                                    | 0         | 0.35       | 0.03                 | 0         | 0.42       |
| 3                            | 0.18                   | 0         | 0.42       | 0.41                    | 6         | 1.19       | 0.13                      | 0         | 0.26       | 0.11                                    | 0         | 0.21       | 0.04                 | 0         | 0.42       |
| 4                            | 0.13                   | 0         | 0.31       | 0.30                    | 0         | 0.91       | 0.10                      | 0         | 0.30       | 0.09                                    | 0         | 0.20       | 0.03                 | 0         | 0.40       |
| 5                            | 0.12                   | 0         | 0.3        | 0.22                    | 0         | 0.68       | 0.05                      | 0         | 0.13       | 0.04                                    | 0         | 0.11       | 0.05                 | 0         | 0.34       |
| 6                            | 0.18                   | 0         | 0.63       | 0.10                    | 0         | 0.25       | 0.09                      | 0         | 0.10       | 0.08                                    | 0         | 0.18       | 0.06                 | 0         | 0.32       |
| 7                            | 0.25                   | 0         | 0.68       | 0.17                    | 0         | 0.3        | 0.13                      | 0         | 0.21       | 0.06                                    | 0         | 0.19       | 0.05                 | 0         | 0.33       |
| 8                            | 0.24                   | 0         | 0.9        | 0.16                    | 0         | 0.3        | 0.14                      | 0         | 0.30       | 0.06                                    | 0         | 0.20       | 0.04                 | 0         | 0.32       |
| 9                            | 0.28                   | 0         | 0.94       | 0.15                    | 0         | 0.29       | 0.17                      | 0         | 0.39       | 0.13                                    | 0         | 0.38       | 0.06                 | 0         | 0.64       |
| 10                           | 0.39                   | 3         | 3          | 0.16                    | 0         | 0.75       | 0.13                      | 0         | 0.27       | 0.15                                    | 0         | 0.32       | 0.05                 | 1         | 1.16       |
| 11                           | 0.49                   | 3         | 6.61       | 0.24                    | 1         | 1.1        | 0.15                      | 0         | 0.44       | 0.13                                    | 0         | 0.29       | 0.06                 | 0         | 0.99       |
| 12                           | 0.57                   | 1         | 3.07       | 0.35                    | 0         | 0.71       | 0.21                      | 0         | 0.38       | 0.18                                    | 0         | 0.36       | 0.07                 | 1         | 1.03       |
| 13                           | 0.84                   | 25        | 3.03       | 0.96                    | 12        | 3.83       | 0.23                      | 0         | 0.97       | 0.34                                    | 0         | 0.85       | 0.07                 | 1         | 1.12       |
| 14                           | 0.91                   | 33        | 3.18       | 0.78                    | 5         | 2.52       | 0.23                      | 0         | 0.98       | 0.22                                    | 0         | 0.43       | 0.07                 | 1         | 1.46       |
| 15                           | 0.79                   | 21        | 2.44       | 0.50                    | 1         | 1.64       | 0.27                      | 0         | 0.91       | 0.23                                    | 0         | 0.50       | 0.05                 | 1         | 1.04       |
| 16                           | 0.71                   | 23        | 2.51       | 0.40                    | 0         | 0.64       | 0.15                      | 0         | 0.37       | 0.14                                    | 0         | 0.47       | 0.03                 | 0         | 0.20       |
| 17                           | 0.45                   | 6         | 4.72       | 0.35                    | 0         | 0.71       | 0.11                      | 0         | 0.26       | 0.20                                    | 0         | 0.45       | 0.03                 | 0         | 0.32       |
| 18                           | 0.30                   | 0         | 0.98       | 0.32                    | 0         | 0.81       | 0.15                      | 0         | 0.34       | 0.13                                    | 0         | 0.22       | 0.03                 | 0         | 0.92       |
| 19                           | 0.25                   | 3         | 1.33       | 0.19                    | 0         | 0.94       | 0.11                      | 0         | 0.22       | 0.18                                    | 0         | 0.37       | 0.03                 | 0         | 0.42       |
| 20                           | 0.48                   | 11        | 4.62       | 0.25                    | 0         | 0.64       | 0.13                      | 0         | 0.47       | 0.11                                    | 0         | 0.26       | 0.04                 | 0         | 0.40       |
| 21                           | 0.27                   | 4         | 3.03       | 0.30                    | 0         | 0.45       | 0.29                      | 0         | 0.92       | 0.16                                    | 0         | 0.53       | 0.04                 | 0         | 0.46       |
| 22                           | 0.24                   | 2         | 1.21       | 0.28                    | 0         | 0.36       | 0.82                      | 3         | 2.42       | 0.17                                    | 0         | 0.29       | 0.03                 | 0         | 0.19       |
| 23                           | 0.18                   | 0         | 1          | 0.36                    | 1         | 1.04       | 0.59                      | 0         | 1.00       | 0.09                                    | 0         | 0.22       | 0.06                 | 0         | 0.20       |
| 24                           | 0.18                   | 1         | 1.12       | 0.35                    | 0         | 0.99       | 0.34                      | 1         | 1.23       | 0.06                                    | 0         | 0.11       | 0.16                 | 0         | 0.36       |
| 25                           | 0.26                   | 2         | 1.03       | 0.28                    | 0         | 0.81       | 0.23                      | 0         | 0.47       | 0.06                                    | 0         | 0.19       | 0.12                 | 0         | 0.33       |
| 26                           | 0.47                   | 8         | 2.25       | 0.57                    | 8         | 2.12       | 0.18                      | 0         | 0.43       | 0.10                                    | 0         | 0.42       | 0.09                 | 0         | 0.31       |
| 27                           | 0.39                   | 4         | 1.76       | 0.49                    | 4         | 2.07       | 0.21                      | 0         | 0.59       | 0.06                                    | 0         | 0.48       | N.A.                 | N.A.      | N.A.       |
| 28                           | 0.63                   | 14        | 2.65       | 0.61                    | 8         | 1.95       | 0.24                      | 0         | 0.42       | 0.04                                    | 0         | 0.45       | N.A.                 | N.A.      | N.A.       |
| 29                           | 0.45                   | 2         | 2.46       | 0.77                    | 10        | 3.9        | N.A. <sup>d</sup>         | N.A.      | N.A.       | 0.05                                    | 0         | 0.32       | N.A.                 | N.A.      | N.A.       |

<sup>a</sup> I, II and IV+V refer to sequences of phylogenetic clades of LRR XII-L depicted in Figure 2. <sup>b</sup> Results of the comparison between AT4G08850 and AT1G35710 of *Arabidopsis* are not shown as they were analysed separately (see the text). For this couple, values for each window were similar to those obtained in the other pairwise comparisons (i.e. in the range: 0.01-0.33). <sup>c</sup> The numbers of the CrRLK1L-L windows do not precisely correspond to those of the other gene groups because of the presence of multiple gaps in the alignment between LRR XII and CrRLK1L.

<sup>d</sup> N.A. = Not available.
