# Supplementary material for: Kinase domain-targeted isolation of defense-related receptor-like kinases (RLK/Pelle) in Platanus × acerifolia: phylogenetic and structural analysis
Source: PubMed Central journal article supplement (PMC4295470; doi:10.1186/1756-0500-7-884), 2014-12-08
Supplement: 13104_2014_3456_MOESM20_ESM.pdf [file 13104_2014_3456_MOESM20_ESM.pdf]

**Additional file 20. Amino acid variability at the kinase domain positions subject to non-synonymous variation.**

Analysis focuses on phylogenetic clades of LRR-XII-L of *Platanus × acerifolia* (*Pac*) and LRR-XII of *Arabidopsis* (refer to Figure 2). The three distinct tables present the data regarding the sharing of the variable positions among four, three and two distinct group of sequences.

| Positions <sup>a</sup> | Amino acid variation <sup>b</sup>                                                             |
|------------------------|-----------------------------------------------------------------------------------------------|
| <b>1</b>               | I clade N<br>II clade M<br>IV/V clade T<br><i>Arabidopsis</i> F                               |
| <b>4</b>               | I clade R<br>II clade Y<br>IV/V clade N H<br><i>Arabidopsis</i> P L T S                       |
| <b>10</b>              | I clade F<br>II clade S T<br>IV/V clade N<br><i>Arabidopsis</i> L A                           |
| <b>19</b>              | I clade L<br>II clade L<br>IV/V clade L<br><i>Arabidopsis</i> L Q P C                         |
| <b>21</b>              | I clade H W C Y Q R<br>II clade H Y Q R<br>IV/V clade H Y Q R<br><i>Arabidopsis</i> H Y Q R   |
| <b>46</b>              | I clade L F<br>II clade L<br>IV/V clade L<br><i>Arabidopsis</i> L I Q V                       |
| <b>52</b>              | I clade T I V A<br>II clade T I V A<br>IV/V clade T I V A<br><i>Arabidopsis</i> T I V L S     |
| <b>55</b>              | I clade E Q K M<br>II clade E K M<br>IV/V clade E K A<br><i>Arabidopsis</i> E Q K             |
| <b>79</b>              | I clade S N T K<br>II clade S N T K<br>IV/V clade S N T K<br><i>Arabidopsis</i> S N T R G E D |

|            |                                                         |                                              |                                  |                                  |                      |                      |   |   |   |
|------------|---------------------------------------------------------|----------------------------------------------|----------------------------------|----------------------------------|----------------------|----------------------|---|---|---|
| <b>83</b>  | I clade<br>II clade<br>IV/V clade<br><i>Arabidopsis</i> | Y                                            | <b>N</b><br><b>N</b><br><b>D</b> | <b>D</b><br><b>D</b><br><b>D</b> | <b>E</b><br><b>E</b> | V                    | H | R | S |
| <b>84</b>  | I clade<br>II clade<br>IV/V clade<br><i>Arabidopsis</i> | <b>G</b><br><b>G</b>                         | <b>E</b><br><b>E</b>             | <b>A</b><br><b>A</b>             | <b>T</b><br><b>T</b> | V                    | I |   |   |
| <b>86</b>  | I clade<br>II clade<br>IV/V clade<br><i>Arabidopsis</i> | <b>H</b><br><b>H</b>                         | <b>N</b><br><b>N</b>             | L                                | V                    | <b>D</b><br><b>D</b> | R |   |   |
| <b>93</b>  | I clade<br>II clade<br>IV/V clade<br><i>Arabidopsis</i> | <b>F</b><br><b>F</b><br><b>F</b><br><b>F</b> | <b>L</b><br><b>L</b><br><b>L</b> | <b>I</b><br><b>I</b>             | P                    |                      |   |   |   |
| <b>113</b> | I clade<br>II clade<br>IV/V clade<br><i>Arabidopsis</i> | <b>Q</b><br><b>Q</b>                         | <b>H</b><br><b>H</b><br><b>H</b> | <b>N</b><br><b>N</b>             | Y                    |                      |   |   |   |
| <b>148</b> | I clade<br>II clade<br>IV/V clade<br><i>Arabidopsis</i> | <b>S</b><br><b>S</b>                         | <b>F</b><br><b>F</b>             | <b>Y</b><br><b>Y</b>             | P                    | <b>L</b><br><b>L</b> |   |   |   |
| <b>149</b> | I clade<br>II clade<br>IV/V clade<br><i>Arabidopsis</i> | <b>K</b><br><b>K</b>                         | <b>N</b><br><b>N</b>             | <b>M</b><br><b>M</b><br><b>M</b> | R                    | E                    |   |   |   |
| <b>153</b> | I clade<br>II clade<br>IV/V clade<br><i>Arabidopsis</i> | Y                                            | <b>N</b><br><b>N</b><br><b>N</b> | F                                | <b>D</b><br><b>D</b> | A                    | R | E |   |
| <b>157</b> | I clade<br>II clade<br>IV/V clade<br><i>Arabidopsis</i> | <b>N</b><br><b>N</b><br><b>N</b>             | F                                | D                                | <b>S</b><br><b>S</b> | G                    | I |   |   |
| <b>159</b> | I clade<br>II clade<br>IV/V clade<br><i>Arabidopsis</i> | <b>T</b><br><b>T</b>                         | <b>S</b><br><b>S</b>             | Y                                | H                    | F                    | L |   |   |

<sup>a</sup> Numbering of the positions refers to Fig. 8.

<sup>b</sup> Aligning and black shading highlight amino acid identity among the different sequence groups.

| Positions <sup>a</sup> | Amino acid variation <sup>b</sup>                                   |
|------------------------|---------------------------------------------------------------------|
| <b>3</b>               | I clade H P R C<br>IV/V clade N G D<br><i>Arabidopsis</i> P G Q L   |
| <b>13</b>              | I clade V I<br>II clade V L<br><i>Arabidopsis</i> V I               |
| <b>24</b>              | II clade S F<br>IV/V clade S Y<br><i>Arabidopsis</i> T M A          |
| <b>33</b>              | I clade A I<br>IV/V clade A S<br><i>Arabidopsis</i> A S T           |
| <b>36</b>              | I clade E A<br>II clade N K<br><i>Arabidopsis</i> G D               |
| <b>43</b>              | I clade L V<br>II clade L V<br><i>Arabidopsis</i> L V A             |
| <b>48</b>              | I clade S A C<br>IV/V clade S A T I I V<br><i>Arabidopsis</i> A I V |
| <b>58</b>              | I clade D F<br>II clade D E<br><i>Arabidopsis</i> D E               |
| <b>64</b>              | I clade F S Y<br>II clade F L<br>IV/V clade F Y                     |
| <b>66</b>              | I clade L F<br>II clade F Y<br><i>Arabidopsis</i> F Y               |
| <b>68</b>              | I clade P H<br>II clade P S T<br>IV/V clade P S                     |
| <b>71</b>              | II clade S N<br>IV/V clade S N<br><i>Arabidopsis</i> S N            |
| <b>74</b>              | I clade N R<br>IV/V clade R K<br><i>Arabidopsis</i> R K M           |
| <b>82</b>              | I clade T L I P<br>II clade T I V<br>IV/V clade E D Y               |

|            |                                              |                             |
|------------|----------------------------------------------|-----------------------------|
| <b>85</b>  | I clade<br>II clade<br><i>Arabidopsis</i>    | R G Q<br>R G H K<br>R G H N |
| <b>88</b>  | II clade<br>IV/V clade<br><i>Arabidopsis</i> | L S<br>L S Q P              |
| <b>90</b>  | I clade<br>II clade<br><i>Arabidopsis</i>    | Y N K D<br>Y C S T          |
| <b>92</b>  | I clade<br>II clade<br><i>Arabidopsis</i>    | N S R C<br>N S T G          |
| <b>99</b>  | I clade<br>II clade<br>IV/V clade            | I M<br>I M V<br>I T         |
| <b>105</b> | I clade<br>II clade<br>IV/V clade            | S F L<br>S F L<br>S C       |
| <b>108</b> | II clade<br>IV/V clade<br><i>Arabidopsis</i> | D N<br>D E<br>D E V         |
| <b>116</b> | II clade<br>IV/V clade<br><i>Arabidopsis</i> | T I<br>T I D E N            |
| <b>123</b> | I clade<br>II clade<br><i>Arabidopsis</i>    | L I<br>L I<br>L I           |
| <b>128</b> | I clade<br>IV/V clade<br><i>Arabidopsis</i>  | V I<br>V I<br>V I           |
| <b>135</b> | I clade<br>II clade<br>IV/V clade            | V I T A<br>V I T S          |
| <b>146</b> | I clade<br>II clade<br>IV/V clade            | F I<br>F I T<br>F I L       |
| <b>150</b> | I clade<br>IV/V clade<br><i>Arabidopsis</i>  | P L I D<br>I A<br>Y F       |
| <b>151</b> | I clade<br>II clade<br>IV/V clade            | T S D<br>T S P<br>T S I     |

|            |                    |          |          |          |   |   |   |     |
|------------|--------------------|----------|----------|----------|---|---|---|-----|
| <b>152</b> | I clade            | <b>K</b> | <b>N</b> | <b>S</b> |   |   |   |     |
|            | II clade           |          | <b>N</b> | <b>S</b> | D |   |   |     |
|            | <i>Arabidopsis</i> | <b>K</b> |          |          |   | R | E | Q   |
| <b>154</b> | I clade            | <b>S</b> | F        | <b>I</b> |   |   |   |     |
|            | II clade           | <b>S</b> |          |          | C |   |   |     |
|            | <i>Arabidopsis</i> | <b>S</b> |          | <b>I</b> |   |   |   |     |
| <b>156</b> | I clade            |          | N        | K        | E |   |   |     |
|            | IV/V clade         |          |          |          |   | R | Q |     |
|            | <i>Arabidopsis</i> |          |          |          |   |   | L | F H |

<sup>a</sup> Numbering of the positions refers to Fig. 8.

<sup>b</sup> Aligning and black shading highlight amino acid identity among the different sequence groups.

| Positions <sup>a</sup> | Amino acid variation <sup>b</sup>                                       |
|------------------------|-------------------------------------------------------------------------|
| <b>5</b>               | I clade      N D<br><i>Arabidopsis</i> E K                              |
| <b>6</b>               | I clade <b>E</b> D <b>K</b><br><i>Arabidopsis</i> <b>E</b> <b>K</b> S N |
| <b>11</b>              | I clade <b>I</b> <b>V</b><br>II clade <b>I</b> <b>V</b> F               |
| <b>16</b>              | I clade <b>F</b> <b>L</b> V<br>IV/V clade <b>F</b> <b>L</b>             |
| <b>18</b>              | II clade <b>L</b> V<br><i>Arabidopsis</i> <b>L</b> M                    |
| <b>23</b>              | II clade <b>A</b> G<br>IV/V clade <b>A</b> S                            |
| <b>29</b>              | I clade <b>T</b> <b>A</b><br>II clade <b>T</b> <b>A</b> V               |
| <b>37</b>              | II clade <b>I</b> V<br><i>Arabidopsis</i> <b>I</b> T                    |
| <b>38</b>              | I clade <b>R</b> <b>Q</b><br>IV/V clade <b>R</b> <b>Q</b>               |
| <b>54</b>              | I clade <b>F</b> I<br><i>Arabidopsis</i> <b>F</b> S                     |
| <b>63</b>              | II clade <b>V</b> <b>I</b><br><i>Arabidopsis</i> <b>V</b> <b>I</b>      |
| <b>67</b>              | I clade <b>M</b> <b>L</b> V<br><i>Arabidopsis</i> <b>M</b> <b>L</b>     |

|            |                                  |                                            |
|------------|----------------------------------|--------------------------------------------|
| <b>69</b>  | II clade<br><i>Arabidopsis</i>   | <b>N</b> S<br><b>N</b> K                   |
| <b>77</b>  | IV/V clade<br><i>Arabidopsis</i> | Y <b>H</b><br><b>H</b> Q                   |
| <b>78</b>  | I clade<br><i>Arabidopsis</i>    | Q <b>P</b><br><b>P</b> L                   |
| <b>89</b>  | I clade<br>IV/V clade            | N K<br>R M G                               |
| <b>94</b>  | I clade<br><i>Arabidopsis</i>    | D G R S<br>A L F                           |
| <b>95</b>  | I clade<br><i>Arabidopsis</i>    | Q K<br>E A                                 |
| <b>98</b>  | I clade<br>II clade              | <b>N</b> <b>D</b><br><b>N</b> <b>D</b>     |
| <b>100</b> | I clade<br><i>Arabidopsis</i>    | <b>A</b> S<br><b>A</b> V                   |
| <b>101</b> | I clade<br>II clade              | <b>I</b> L <b>M</b><br><b>I</b> <b>M</b>   |
| <b>103</b> | I clade<br>II clade              | <b>V</b> I<br><b>V</b> A                   |
| <b>106</b> | I clade<br><i>Arabidopsis</i>    | <b>A</b> T<br><b>A</b> V                   |
| <b>111</b> | I clade<br>II clade              | <b>H</b> <b>Q</b><br><b>H</b> <b>Q</b> K   |
| <b>112</b> | I clade<br><i>Arabidopsis</i>    | H Y<br>V T                                 |
| <b>114</b> | I clade<br>IV/V clade            | <b>C</b> N<br><b>C</b> S                   |
| <b>115</b> | II clade<br>IV/V clade           | <b>P</b> S <b>Q</b><br><b>P</b> <b>Q</b> K |
| <b>119</b> | II clade<br>IV/V clade           | <b>V</b> A<br><b>V</b> I                   |
| <b>131</b> | II clade<br><i>Arabidopsis</i>   | <b>D</b> N<br><b>D</b> E                   |
| <b>132</b> | IV/V clade<br><i>Arabidopsis</i> | <b>D</b> N<br><b>D</b> K                   |
| <b>133</b> | I clade<br>II clade              | <b>D</b> G N S<br><b>D</b> E               |

|            |                        |                      |                      |        |   |
|------------|------------------------|----------------------|----------------------|--------|---|
| <b>147</b> | I clade<br>IV/V clade  | <b>L</b><br><b>L</b> | I<br>H               |        |   |
| <b>155</b> | I clade<br>II clade    | <b>G</b><br><b>G</b> | R<br>S               | D<br>A |   |
| <b>158</b> | I clade<br>IV/V clade  |                      | K<br>E               | D<br>Q | H |
| <b>162</b> | II clade<br>IV/V clade |                      | I<br>A               | V<br>I | M |
| <b>163</b> | I clade<br>II clade    | V<br>A               | <b>A</b><br><b>A</b> | T      |   |
| <b>164</b> | I clade<br>II clade    | <b>I</b><br><b>I</b> | <b>L</b><br><b>L</b> |        |   |

<sup>a</sup> Numbering of the positions refers to Fig. 8.

<sup>b</sup> Aligning and black shading highlight amino acid identity among the different sequence groups.
